# Supplementary material for: Core Proteomic Analysis of Unique Metabolic Pathways of Salmonella enterica for the Identification of Potential Drug Targets
Source: PLoS One. 2016 Jan 22;11(1):e0146796. doi: 10.1371/journal.pone.0146796 (PMC4723313; doi:10.1371/journal.pone.0146796)
Supplement: S2 Table — (XLSX) [file pone.0146796.s003.xlsx]

## Sheet: S3 Table
S2 Table. Number of Genes present in Unique Metabolic Pathways of 42 strains of S. enterica
KEGG Pathway ID	KEGG Pathway Name	KEGG Organism Code
		sea	seb	sec	sed	see	seeb	seec	seeh	seen	seep	sef	seg	sega	she	sei	sej	sek	sel	sem	senb	send	sene	senh	senj	senn	senr	sent	seo	ses	set	setc	setu	sev	sew	sex	sey	shb	spq	spt	stm	stt	sty
253	Tetracycline biosynthesis	4	4	4	4	4	4	4	4	4	3	4	4	4	4	4	4	4	3	4	4	4	4	4	4	4	4	4	4	4	4	4	4	4	4	4	4	4	4	4	4	4	4
281	Geraniol degradation	4	4	4	4	4	4	4	4	4	3	4	4	4	4	4	4	4	4	4	4	4	4	4	4	4	4	4	4	4	4	4	4	4	4	4	4	4	4	4	4	4	4
312	β-Lactam resistance	-	-	2	-	2	-	-	1	-	-	-	-	-	1	-	-	-	-	1	-	1	-	-	-	1	-	-	-	-	-	-	1	-	1	-	-	-	-	-	-	-	1
361	Chlorocyclohexane and chlorobenzene degradation	2	2	2	1	2	2	2	2	2	2	2	2	2	1	2	2	1	2	2	2	2	2	1	1	2	2	1	2	1	2	2	2	2	1	1	2	1	2	1	2	1	1
362	Benzoate degradation	5	5	5	5	5	5	6	5	5	3	5	5	5	5	5	5	5	5	5	5	5	5	5	5	5	5	5	5	5	5	5	5	5	5	5	5	5	6	5	5	5	5
363	Bisphenol degradation	2	-	1	2	2	-	-	-	-	-	-	1	-	1	2	-	1	-	-	-	-	-	-	-	-	-	-	-	1	2	-	-	-	2	-	-	-	2	1	2	2	2
364	Fluorobenzoate degradation	1	1	1	-	1	1	1	1	1	1	1	1	1	1	1	1	1	1	1	1	1	1	1	1	1	1	1	1	1	1	1	1	1	1	1	1	1	1	1	1	1	1
401	Novobiocin biosynthesis	4	4	4	4	4	4	4	4	4	4	4	4	4	4	4	4	4	4	4	4	4	4	4	4	4	4	4	4	4	4	4	4	4	4	4	4	4	4	4	4	4	4
440	Phosphonate and phosphinate metabolism	4	4	4	4	4	4	5	4	4	3	4	4	4	4	4	4	4	4	4	4	4	4	4	4	4	4	4	4	9	4	4	4	4	4	4	4	4	5	4	4	4	4
473	D-Alanine metabolism	4	4	4	4	4	4	4	4	4	4	4	4	3	4	4	4	4	3	4	4	4	4	4	4	4	4	5	4	4	5	4	4	4	4	4	4	4	4	4	4	5	5
521	Streptomycin biosynthesis	10	10	5	8	8	7	7	8	10	8	9	8	8	8	5	10	9	8	10	11	10	7	8	7	8	10	9	10	6	8	10	10	10	9	9	10	8	11	9	10	9	9
540	Lipopolysaccharide biosynthesis	27	27	27	27	27	27	27	27	26	27	27	27	27	27	27	27	27	27	27	27	26	27	27	27	27	27	27	27	27	27	27	27	26	27	27	27	26	27	27	27	27	27
550	Peptidoglycan biosynthesis	24	24	23	24	24	24	24	24	24	22	24	24	23	24	24	24	22	22	24	24	24	24	24	24	24	24	22	24	24	24	24	24	24	24	23	24	24	24	22	24	22	22
621	Dioxin degradation	3	3	3	3	3	3	4	3	3	2	3	3	3	3	3	3	3	3	3	3	3	3	3	3	3	3	3	3	2	3	3	3	3	3	3	3	3	4	3	3	3	3
622	Xylene degradation	2	2	2	2	2	2	3	2	2	1	2	2	2	2	2	2	2	2	2	2	2	2	2	2	2	2	2	2	2	2	2	2	2	2	2	2	2	3	2	2	2	2
623	Toluene degradation	9	9	8	8	9	9	9	9	9	8	9	9	9	9	9	9	9	9	9	9	9	9	9	9	9	9	9	9	9	9	9	9	9	9	9	9	9	9	9	9	9	9
624	Polycyclic aromatic hydrocarbon degradation	1	1	2	1	1	1	1	1	1	1	1	1	1	1	1	1	1	1	1	1	1	1	1	1	1	1	1	1	-	1	1	1	1	1	1	1	1	1	1	2	1	1
625	Chloroalkane and chloroalkene degradation	5	4	5	5	5	4	5	4	4	4	4	5	4	4	6	4	3	4	4	4	4	4	3	4	4	4	2	4	5	6	4	4	4	5	2	4	3	6	3	6	4	4
626	Naphthalene degradation	4	4	5	4	4	4	5	4	4	4	4	4	4	4	5	4	4	4	4	4	4	4	4	5	4	4	3	4	5	5	4	4	4	5	3	4	4	5	4	5	4	4
627	Aminobenzoate degradation	3	3	3	3	3	3	3	3	3	3	3	3	3	3	2	3	3	3	3	3	3	3	3	3	3	2	3	3	2	3	3	3	3	3	3	3	3	3	3	3	3	3
633	Nitrotoluene degradation	9	8	5	9	9	9	9	9	9	9	8	8	9	9	9	9	8	9	9	9	9	9	9	9	9	9	7	9	9	8	9	9	9	8	7	8	9	8	8	9	7	7
642	Ethylbenzene degradation	2	2	2	2	2	2	2	2	2	1	2	2	2	2	2	2	2	2	2	2	2	2	2	2	2	2	2	2	2	2	2	2	2	2	2	2	2	2	2	2	2	2
643	Styrene degradation	1	1	1	1	1	1	1	1	1	1	1	1	1	1	-	1	1	1	1	1	1	1	1	1	1	1	1	1	1	1	1	1	1	1	1	1	1	1	1	1	1	1
680	Methane metabolism	27	33	25	27	26	31	29	31	30	24	34	31	26	29	27	30	28	25	33	28	29	30	32	31	30	33	27	33	27	31	32	30	33	26	27	33	32	28	28	32	28	28
791	Atrazine degradation	-	-	-	-	-	-	-	-	-	-	-	-	-	-	-	-	-	-	-	-	-	-	-	-	-	-	-	-	-	-	-	-	-	-	1	-	-	-	-	-	-	-
903	Limonene and pinene degradation	2	2	2	2	2	2	2	2	2	2	2	2	2	2	2	2	2	2	2	2	2	2	2	2	2	2	2	2	2	2	2	2	2	2	2	2	2	2	2	2	2	2
930	Caprolactam degradation	2	2	2	2	2	2	2	2	2	2	2	2	2	2	2	2	2	2	2	2	2	2	2	2	2	2	2	2	2	2	2	2	2	2	2	2	2	2	2	2	2	2
1053	Biosynthesis of siderophore group nonribosomal peptides	6	6	6	6	6	6	6	6	6	3	6	6	6	6	6	6	6	6	6	6	6	6	6	5	6	6	6	6	6	6	11	6	6	6	6	6	6	6	6	6	6	6
1054	Nonribosomal peptide structures	1	1	1	1	1	1	1	1	1	1	1	1	1	1	1	1	1	1	1	1	1	1	1	1	1	1	1	1	1	1	1	1	1	1	1	1	1	1	1	1	1	1
2020	Two-component system	158	162	157	154	161	156	161	156	155	135	156	153	144	160	157	161	145	145	161	152	154	155	164	158	156	153	148	162	138	161	155	160	159	161	151	160	156	162	148	165	148	149
2030	Bacterial chemotaxis	23	23	24	23	24	21	21	21	21	19	23	22	21	24	24	23	22	23	23	21	21	21	21	24	21	21	21	23	23	24	21	22	23	24	20	23	23	24	22	24	21	21
2040	Flagellar assembly	36	37	36	36	37	36	36	37	36	31	37	32	34	37	37	37	37	34	37	35	37	37	37	37	37	37	36	37	36	36	37	37	37	37	36	37	36	37	37	37	36	36
2060	Phosphotransferase system (PTS)	45	55	49	45	55	50	49	60	48	42	55	44	45	58	49	50	45	43	56	50	55	51	60	51	54	55	46	50	47	47	55	55	55	51	46	55	60	51	45	58	46	45
3070	Bacterial secretion system	52	45	43	57	43	39	49	55	45	44	44	45	45	44	44	45	46	45	45	39	45	45	55	39	44	45	45	45	49	39	45	45	45	54	42	45	54	39	46	45	43	43
