# Supplementary material for: Core Proteomic Analysis of Unique Metabolic Pathways of Salmonella enterica for the Identification of Potential Drug Targets
Source: PLoS One. 2016 Jan 22;11(1):e0146796. doi: 10.1371/journal.pone.0146796 (PMC4723313; doi:10.1371/journal.pone.0146796)
Supplement: S5 Table — (XLSX) [file pone.0146796.s006.xlsx]

## Sheet: S6 Table
S5 Table. NCBI-Gis of Non-homologous Essential Enzymes of S. enterica 42 strains as drug targets
COP #	stm	sty	stt	spt	sec	ses	spq	seeh	seh	sew	sek	sea	sed	sega	setc	sei	sey	sel	sex	sev	seo	seb	sem	sej	sef	shb	senj	setu	sent	seec	senh	set	seeb	seen	see	senn	seep	seg	senb	sene	senr	send
4	16765105	16760122	29142107	56413314	62180328	161503125	161613744	194445229	194450899	194736654	197362239	197247994	198243056	205352568	207856729	224583746	378699640	378955271	378959839	378445171	378450332	379700935	378984325	378989104	383496455	386591598	452120046	482903576	488654188	525817650	525826499	525838085	525857818	526220370	525947147	528819558	529219838	537436847	538362354	549479521	549724386	550901119
23	16763604	16759204	29140754	56412487	62178784	161504668	161612584	194443587	194448092	194736783	197361422	197248735	198245098	205351551	207855731	224582062	378698193	378954022	378958361	378443667	378448525	379699435	378982756	378987619	383495037	386590106	452121478	482902765	488652776	525816087	525827744	525839325	525856628	526219162	525948329	528817923	529218945	537435588	538360794	549478322	549722938	550899635
29	16767384	16762323	29143811	56415957	62182579	161505390	161617263	194443060	194448821	194737003	197364884	449785080	198245978	205354304	207859309	224585933	378701977	378957137	378961666	378447456	378453046	379703366	378986807	378991401	383498718	386589462	452122107	482906671	488655942	525815421	525828270	525839878	525856032	526218070	525948851	528821276	529221265	537438703	538364708	549481316	549726647	550903479
31	228960702	541470441	229220623	459642605	229037903	228879514	161616530	194446165	194448739	194734007	197364338	197250545	198244536	205354883	207858733	224585287	378701387	378957659	378962194	378446869	378452331	379702753	378986088	378990798	383498135	386593168	452122695	482906060	488656452	525814764	525828764	525840378	525859182	526218571	525945842	528817110	529221642	537439226	538364088	549480819	549726047	550902837
33	16763580	16759189	29140739	56412466	62178760	161504685	161612551	194442340	194450105	194738399	197361402	197251303	198242626	205351529	207855706	224582037	378698169	378953998	378958345	378443643	378448498	379699411	378982732	378987595	383495013	386590083	452121496	482902741	488652760	525816064	525830382	525841103	525859633	526221953	525949706	528817895	529221992	537435565	538360768	549481699	549722914	550899611
40	16766305	16761780	29143264	56414950	62181512	161506453	161615939	194444522	194449217	194734275	197363879	197249676	198243829	205353943	207858266	224584792	378700913	378956631	378961082	378446358	378451765	379702260	378985593	378990324	383497671	386592694	452123179	482905565	488655379	525814275	525829164	525837115	525858769	526221393	525946255	528820826	529220855	537438195	538363586	549480415	549725571	550902366
43	16765665	16761263	29141041	56412765	62180909	161502518	161612930	194443880	194448796	194737608	197361699	197248002	198243957	205353453	207857756	224583174	378700248	378954314	378958672	378445765	378451059	379701570	378984900	378989724	383497039	386592146	452123837	482904153	488653075	525818225	525829629	525837570	525858333	526220884	525946696	528820157	529219171	537435883	538362953	549479974	549724994	550901772
49	16765263	16760870	29141438	56413160	62180498	161502957	161613519	194445685	194448904	194734522	197362086	197250190	198243368	205352376	207856558	224583575	378699793	378955484	378959111	378445312	378450530	379701106	378984487	378989267	383496600	386591758	452119880	482903742	488653491	525817817	559997190	525837958	525857998	526220497	525947020	528819734	529219979	537437051	538362544	549479649	549724546	550901320
50	16766970	16762624	29144113	56415577	62182179	161505779	161616759	194442311	194449488	194737376	197364504	197247504	198244431	205354711	207858922	224585484	378701572	378957460	378962001	378447054	378452563	379702946	378986282	378990987	383498319	386593358	452122517	482906250	488656272	525814957	525830578	525841293	525860394	526221798	525949069	528816914	529222682	537439028	538364293	549482311	549726236	550903027
65	16763512	16759117	29140667	56412394	62178689	161504756	161612466	194446375	194450364	194734823	197361330	197249986	198245181	205351461	207855636	224581965	378698102	378953926	378958269	378443576	378448422	379699343	378982663	378987528	383494944	386590001	452121573	482902671	488652687	525815979	525827830	525839411	525856542	526219075	525948415	528817821	529218873	537435492	538360693	549478236	549722847	550899547
67	16765177	16760725	29141517	56413245	62180400	161503040	161613654	194442429	194447947	194735872	197362171	197247470	198244061	205352500	207856658	224583674	378699712	378955342	378959199	378445242	378450418	379701012	378984397	378989176	383496524	386591665	452119974	482903647	488653576	525817722	525830030	525838019	525857884	526220436	525947081	528819634	529219894	537436919	538362430	549479587	549724456	550901191
74	16765534	16761145	29141161	56412884	62180790	161502634	161613096	194444019	194448283	194738383	197361815	197248030	198244051	205353338	207857638	224583298	378700117	378954435	378958801	378445639	378450901	379701434	378984766	378989591	383496912	386592014	452119591	482904020	488653199	525818094	525829731	525837673	525858237	526220780	525946792	528820030	529219256	537436004	538362829	549479877	549724869	550901642
93	16766989	541470439	161486772	459642608	62182197	161505761	161616782	194446578	194450570	194733987	197364521	197250579	198245019	205354693	207858941	224585504	378701592	378957441	378961982	378447073	378452584	379702965	378986301	378991006	383498339	386593377	452122502	482906268	488656254	525814976	525828589	525840209	525859352	526218402	525945675	528816892	529221497	537439010	538364314	549480987	549726256	550903046
98	16764922, 16765104	16760123, 16760301	29141934, 29142106	56413315, 56413475	62180147, 62180327	161503126	161613745, 161613976	194445816, 194444066	194450643, 194450438	194736461, 194737276	197362240, 197362399	197249326, 197251245	198243341, 198245547	205352569, 205352736	207856730, 207856927	224583747, 224583930	378699458, 378699639	378955098, 378955270	378959648, 378959838	378444992, 378445170	378450114, 378450331	379700749, 379700934	378984138, 378984324	378988918, 378989103	383496279, 383496454	386591597	452120047, 452120243	482903389, 482903575	488654004, 488654187	525817464, 525817649	525826651, 525826500	525838086, 525838235	525857661, 525857817	526220220, 526220369	525947148, 525947298	528819366, 528819557	529219837	537436672, 537436846	538362163, 538362353	549479370, 549479520	549724203, 549724385	550900938, 550901118
113	16763513	16759118	29140668	56412395	62178690	161504755	161612467	194443335	194449143	194737109	197361331	197251914	198245705	205351462	207855637	224581966	378698103	378953927	378958270	378443577	378448423	379699344	378982664	378987529	383494945	386590002	452121572	482902672	488652688	525815980	525827829	525839410	525856543	526219076	525948414	528817822	529218874	537435493	538360694	549478237	549722848	550899548
119	16764558	16760079	29142150	56413811	62179723	161503704	161614570	194443206	194450871	194735242	197362734	197249202	198244688	205353062	207857290	224584290	378699096	378954743	378959884	378444636	378449601	379700373	378983763	378988547	383495925	386591065	452120629	482903014	488654231	525817091	525826955	525838534	525857361	526219920	525947600	528818985	529219469	537436313	538361709	549479070	549723843	550900580
121	16763519	16759124	29140674	56412401	62178696	161504749	161612473	194445444	194450712	194734645	197361337	197247646	198242404	205351468	207855643	224581972	378698109	378953933	378958276	378443583	378448429	379699350	378982670	378987535	383494951	386590008	452121566	482902678	488652694	525815986	525827824	525839405	525856548	526219081	525948409	528817828	529218877	537435499	538360700	549478242	549722854	550899554
123	16764585	16760105	29142124	56413784	62179751	161503676	161614535	194444857	194449089	194735519	197362707	197248978	198245737	205353036	207857263	224584262	378699123	378954771	378959856	378444663	378449631	379700401	378983790	378988574	383495952	386591092	452120601	482903042	488654205	525817118	525826930	525838509	525857386	526219945	525947576	528819012	529219493	537436342	538361800	549479095	549723871	550900606
127	16766596	16762062	29143551	56415229	62181808	161506137	161616308	194446146	194450548	194734972	197364159	197248961	198245882	205354201	207858548	224585096	378701200	378956913	378961392	378446686	378452119	379702560	378985896	378990611	383497954	386592984	452122882	482905867	488655674	525814576	525828923	525836869	525859024	526221635	525946002	528821135	529221084	537438479	538363898	549480661	549725860	550902655
139	16763740	16759338	29142890	56414483	62178971	161504450	161615466	194445894	194447398	194736276	197363404	197248698	198244899	205351675	207855842	224582197	378698324	378956257	378960681	378443864	378448679	379699574	378982963	378987761	383495170	386590294	452121377	482905055	488654999	525816291	525827603	525839178	525856731	526219266	525948245	528818070	529220535	537437825	538360908	549478427	549723074	550899814
140	16765460	16761059	29141244	56412970	62180702	161502713	161613185	194445990	194449300	194737114	197361900	197248256	198244518	205353272	207857566	224583380	378700043	378954511	378958891	378445566	378450810	379701356	378984694	378989517	383496839	386591943	452119672	482903947	488653280	525818021	525829796	525837739	525858170	526220714	525946858	528819952	529219316	537436080	538362753	549479811	549724796	550901569
152	16767324	16762376	29143864	56415904	62182519	161505431	161617189	194444500	194447690	194737962	197364833	197251368	198245079	205354364	207859246	224585871	378701917	378957202	378961722	378447396	378452974	379703304	378986745	378991340	383498659	386589411	452122165	482906609	488656000	525815322	525828317	525839931	525855985	526218123	525948904	528821380	529221310	537438769	538364645	549481263	549726585	550903419
157	16763514	16759119	29140669	56412396	62178691	161504754	161612468	194444164	194448592	194736510	197361332	197251461	198246066	205351463	207855638	224581967	378698104	378953928	378958271	378443578	378448424	379699345	378982665	378987530	383494946	386590003	452121571	482902673	488652689	525815981	525827828	525839409	525856544	526219077	525948413	528817823	529218875	537435494	538360695	549478238	549722849	550899549
160	16766789	16762786	29144273	56415416	62182003	161505933	161616541	194446263	194450163	194734811	449784991	197250086	198243010	205354875	207858741	224585295	378701395	378957651	378962185	378446877	378452342	379702761	378986096	378990806	383498143	386593176	452122687	482906068	488656444	525814772	525828756	525840370	525859190	526218563	525945834	528817102	529221635	537439217	538364097	549480827	549726055	550902845
166	16766998	16762597	29144086	56415603	62182206	161505752	161616791	194443618	194450945	194737936	197364530	197251849	198245607	205354684	207858950	224585513	378701601	378957432	378961973	378447082	378452594	379702974	378986310	378991015	383498348	386593386	452122493	482906277	488656245	525814985	525828581	525840201	525859360	526218394	525945667	528816883	529221489	537439001	538364323	549480995	549726266	550903056
174	16765637	16761236	29141068	56412792	62180880	161502545	161612965	194443736	194450238	194737064	197361726	197247503	198242217	205353425	207857728	224583205	378700220	378954342	378958701	378445739	378451025	379701541	378984872	378989696	383497011	386592119	452123863	482904124	488653102	525818199	525829650	525837592	525858311	526220862	525946717	528820128	529219193	537435911	538362923	549479952	549724966	550901746
177	16763516	16759121	29140671	56412398	62178693	161504752	161612470	194442341	194448105	194736856	197361334	197248149	198243206	205351465	207855640	224581969	378698106	378953930	378958273	378443580	378448426	379699347	378982667	378987532	383494948	386590005	452121569	482902675	488652691	525815983	525830400	525841107	525859613	526221950	525949724	528817825	529221985	537435496	538360697	549481680	549722851	550899551
179	16764817	16760444	409994508	56413563	62180058	161503432	161614109	194442422	194448686	194738016	197362487	197251835	198245106	205352818	207857027	224584021	378699354	378955006	378959497	378444894	378449985	379700640	378984025	378988807	383496173	386591316	452120355	482903278	488653859	525817356	525826741	525838324	525857575	526220132	525947386	528819252	529219664	537436579	538362050	549479282	549724103	550900834
186	16763778	16759375	29142854	56414447	62179009	161504417	161615420	194442327	194448403	194737079	197363368	197250186	198243538	205351710	207855880	224582235	378698362	378956218	378960639	378443902	378448728	379699616	378983003	378987799	383495207	386590331	452121337	482905015	488654960	525816331	525827569	525839144	525856765	526219300	525948211	528818111	529220505	537437786	538360950	549478461	549723112	550899852
190	16764014	16759596	29142631	56414228	62179236	161504189	161615147	194442745	194448720	194736722	197363151	197250303	198245247	205351925	207856103	224582473	378698590	378955979	378960397	378444131	378448993	379699855	378983240	378988035	383495437	386590565	452121131	482904777	488654727	525816570	525827369	525838944	525856969	526219500	525948009	528818357	529220329	537437546	538361182	549478658	549723339	550900070
192	16767009	16762585	29144074	56415614	62182217	161505740	161616804	194443187	194449972	194736070	449784995	197247988	198245637	205354674	207858961	224585524	378701612	378957421	378961960	378447093	378452606	379702985	378986321	378991026	383498359	386593396	452122482	482906288	488656234	525814996	525828572	525840192	525859369	526218385	525945658	528816871	529221480	537438990	538364334	549481004	549726277	550903067
194	16766602	16762069	29143558	56415236	62181815	161506130	161616316	194446526	194447912	194736799	197364166	197248851	198243198	205354208	207858555	224585104	378701207	378956921	378961400	378446693	378452126	379702568	378985905	378990618	383497961	386592992	452122876	482905876	488655681	525814583	525828918	525836864	525859029	526221640	525945997	528821142	529221089	537438487	538363906	549480666	549725867	550902662
205	16765664	16761262	29141042	56412766	62180908	161502519	161612931	194443104	194448091	194736648	449784916	197247514	198244863	205353452	207857755	224583175	378700247	378954315	378958673	378445764	378451058	379701569	378984899	378989723	383497038	386592145	452123838	482904152	488653076	525818224	525829630	525837571	525858332	526220883	525946697	528820156	529219172	537435884	538362952	549479973	549724993	550901771
218	16763619	16759219	29140769	56412502	62178799	161504652	161612602	194443198	194450186	194736847	197361437	197249560	198242586	205351566	207855747	224582077	378698208	378954038	378958376	378443682	378448542	379699450	378982771	378987634	383495052	386590121	452121464	482902780	488652791	525816102	525827729	525839310	525856643	526219177	525948314	528817939	529218960	537435604	538360809	549478337	549722953	550899650
221	16764111	16759680	29142547	56414142	62179315	161504097	161615026	194443845	194450450	194734408	197363064	197247810	198244832	205352005	207856185	224582560	378698684	378955890	378960298	378444225	378449103	379699954	378983339	378988131	383495528	386590657	452121041	482904679	488654638	525816668	525827295	525838870	525857038	526219574	525947940	528818458	529220271	537437457	538361269	549478727	549723433	550900166
226	16767007	16762587	29144076	56415612	62182215	161505743	161616800	194446741	194449220	194737226	197364539	197250020	198243128	205354676	207858959	224585522	378701610	378957423	378961964	378447091	378452603	379702983	378986319	378991024	383498357	386593394	452122484	482906286	488656236	525814994	525828574	525840194	525859367	526218387	525945660	528816874	529221482	537438992	538364332	549481002	549726275	550903065
230	16766450	16761928	29143415	56415091	62181661	161506279	161616130	194446655	194450897	194735997	197364020	197248842	198244463	205354068	207858409	224584946	378701056	378956768	378961246	378446501	378451953	379702408	378985745	378990468	383497810	386592849	452123029	482905717	488655534	525814435	525829040	525836993	525858904	526221514	525946125	528820989	529220973	537438333	538363747	549480537	549725713	550902510
242	16763515	16759120	29140670	56412397	62178692	161504753	161612469	194442805	194448066	194735332	197361333	197248344	198244846	205351464	207855639	224581968	378698105	378953929	378958272	378443579	378448425	379699346	378982666	378987531	383494947	386590004	452121570	482902674	488652690	525815982	525827827	525839408	525856545	526219078	525948412	528817824	529218876	537435495	538360696	549478239	549722850	550899550
244	16766369	16761850	29143337	56415014	162139549	161506380	229307086	194444299	194451269	194735008	197363943	197248963	198243554	205353992	207858331	224584861	378700976	378956685	378961160	378446422	378451851	379702325	378985661	378990388	383497732	386592772	452123115	482905632	488655454	525814349	525829111	525837064	525858819	526221444	525946196	528820896	529220905	537438249	538363658	549480466	549725633	550902431
245	16767497	16762928	29144415	56416047	62182696	161505290	161617376	194444595	194448214	194735891	197364974	197249755	198244007	205355019	207859401	224586012	378702090	378957803	378962337	378447566	378453180	379703487	378986923	378991516	383498827	386589573	452122019	482906787	488656590	525815534	525828177	525839785	525856177	526218702	525948775	528817280	529221748	537439371	538364827	549481409	549726761	550903591
246	16767541	16762973	29144460	56416090	62182740	161505228	161617434	194443672	194451298	194733917	197365016	197250751	198244901	205355062	207859445	224586056	378702134	378957847	378962383	378447610	378453238	379703533	378986967	378991559	383498869	386589617	452121972	482906829	488656634	525815580	559996976	525841187	525859486	526221874	525949827	528817325	529222760	537439415	538364874	549482407	549726805	550903635
250	16767008	16762586	29144075	56415613	62182216	161505742	161616801	194443756	194449746	194735337	197364540	197251087	198246122	205354675	207858960	224585523	378701611	378957422	378961963	378447092	378452604	379702984	378986320	378991025	383498358	386593395	452122483	482906287	488656235	525814995	525828573	525840193	525859368	526218386	525945659	528816873	529221481	537438991	538364333	549481003	549726276	550903066
259	16765259	16760866	29141442	56413163	62180494	161502967	161613523	194442838	194448548	194736588	197362089	197251203	198242380	205352379	207856562	224583579	378699789	378955479	378959116	378445308	378450526	379701102	378984483	378989263	383496596	386591754	452119884	482903738	488653495	525817813	525829972	525837962	525857994	526220493	525947024	528819730	529219975	537437046	538362539	549479645	549724542	550901316
260	16767271	16762426	29143914	56415852	62182468	161505494	161617129	194444506	194450587	194736166	197364782	197249594	198243097	205354411	207859198	224585816	378701864	378957256	378961773	378447343	378452911	379703248	378986690	378991287	383498606	386589363	452122221	482906556	488656052	525815271	525828358	525839977	525855940	526218169	525948949	528821437	529221352	537438825	538364584	549481217	549726531	550903368
261	16766996	16762599	29144088	56415601	62182204	161505754	161616789	194443073	194447352	194737811	197364528	197250450	198243825	205354686	207858948	224585511	378701599	378957434	378961975	378447080	378452592	379702972	378986308	378991013	383498346	386593384	452122495	482906275	488656247	525814983	525830575	525841290	525860397	526221795	525949066	528816885	529222679	537439003	538364321	549482314	549726264	550903054
263	16767396	16762311	29143799	56415969	62182595	161505376	161617277	194443092	194447663	194737386	197364896	197248269	198244381	205354454	207859321	224585684	378701989	378957046	378961653	378447468	378453060	379703378	378986819	378991413	383498730	386589474	452122095	482906683	488655930	525815433	525828259	525839867	525856043	526218059	525948840	528821264	529221189	537438611	538364720	549481327	549726659	550903491
265	16763616	16759216	29140766	56412499	62178796	161504655	161612598	194446270	194449850	194737345	197361434	197251563	198245250	205351563	207855744	224582074	378698205	378954035	378958373	378443679	378448539	379699447	378982768	378987631	383495049	386590118	452121467	482902777	488652788	525816099	525827732	525839313	525856640	526219174	525948317	528817936	529218957	537435601	538360806	549478334	549722950	550899647
271	16767003	16762592	29144081	56415608	62182211	161505747	161616796	194442386	194451361	194737566	197364535	197249176	198245583	205354680	207858955	224585518	378701606	378957427	378961968	378447087	378452599	379702979	378986315	378991020	383498353	386593391	452122488	482906282	488656240	525814990	525828577	525840197	525859364	526218390	525945663	528816878	529221485	537438996	538364328	549480999	549726271	550903061
272	16767002	16762593	29144082	56415607	62182210	161505748	161616795	194446313	194450584	194734939	197364534	197248675	198242856	205354681	207858954	224585517	378701605	378957428	378961969	378447086	378452598	379702978	378986314	378991019	383498352	386593390	452122489	482906281	488656241	525814989	525828578	525840198	525859363	526218391	525945664	528816879	529221486	537438997	538364327	549480998	549726270	550903060
273	16763741	16759339	29142889	56414482	62178972	161504449	161615465	194443076	194448054	194737263	197363403	197251858	198244418	205351676	207855843	224582198	378698325	378956256	378960680	378443865	378448680	379699575	378982964	378987762	383495171	386590295	452121376	482905054	488654998	525816292	525827602	525839177	525856732	526219267	525948244	528818071	529220534	537437824	538360909	549478428	549723075	550899815
280	16764511	16760032	29142197	56413857	162139596	161503758	161614626	194445518	194449360	194733926	197362780	197249376	198242211	205353106	207857337	224584342	378699048	378954694	378959931	378444588	378449548	379700325	378983714	378988499	383495878	386591019	452120683	482902966	488654279	525817042	525826996	525838575	525857320	526219879	525947641	528818936	529219432	537436264	538361658	549479029	549723794	550900531
282	16764345	16759855	29142372	56413966	62179512	161503887	161614777	194446364	194448026	194737504	197362889	197250560	198245269	205352192	207856376	224582795	378698880	378955691	378960114	378444422	378449345	379700151	378983543	378988329	383495724	386590850	452120852	482904475	488654463	525816866	525827128	525838699	525857208	526219745	525947775	528818712	529220117	537437258	538361476	549478896	549723628	550900359
285	16765171	16760719	29141523	56413251	62180394	161503046	161613660	194446658	194448000	194738274	197362177	197248916	198243985	205352505	207856664	224583679	378699706	378955337	378959205	378445236	378450412	379701006	378984391	378989171	383496518	386591659	452119980	482903641	488653582	525817716	525830035	525838024	525857879	526220431	525947086	528819628	529219889	537436914	538362424	549479582	549724450	550901185
291	16766997	16762598	29144087	56415602	62182205	161505753	161616790	194446473	194450269	194737435	197364529	197248164	198243192	205354685	207858949	224585512	378701600	378957433	378961974	378447081	378452593	379702973	378986309	378991014	383498347	386593385	452122494	482906276	488656246	525814984	525828582	525840202	525859359	526218395	525945668	528816884	529221490	537439002	538364322	549480994	549726265	550903055
301	16763524	16759129	29140679	56412406	62178701	161504744	161612478	194442525	194448520	194737789	197361342	197249844	198244953	205351473	207855648	224581977	378698114	378953937	378958281	378443588	378448434	379699355	378982675	378987540	383494956	386590013	452121561	482902683	488652699	525815991	525827819	525839400	525856553	526219086	525948404	528817833	529218881	537435503	538360705	549478247	549722859	550899559
321	16765260	16760867	29141441	56413162	62180495	161502966	161613522	194446749	194449073	194737081	197362088	197247581	198245186	205352378	207856561	224583578	378699790	378955480	378959115	378445309	378450527	379701103	378984484	378989264	383496597	386591755	452119883	482903739	488653494	525817814	525829971	525837961	525857995	526220494	525947023	528819731	529219976	537437047	538362540	549479646	549724543	550901317
326	16763974	16759556	29142671	56414266	62179198	161504232	161615198	194446405	194449735	194736615	197363189	197250442	198243224	205351886	207856063	224582430	378698550	378956023	378960443	378444091	378448944	379699814	378983200	378987996	383495397	386590527	452121171	482904817	488654769	525816530	525830292	525841006	525859714	526222021	525949615	528818315	529222388	537437590	538361140	549481780	549723300	550900030
328	16765113	16760665	29141576	56413307	62180336	161503116	161613732	194446013	194451824	194737901	197362232	197248417	198243566	205352560	207856721	224583738	378699648	378955277	378959269	378445179	378450342	379700943	378984333	378989112	383496463	386591605	452120038	482903584	488653639	525817658	525826491	525838077	525857826	526220378	525947139	528819566	529219844	537436854	538362363	549479529	549724393	550901128
333	308065956	16761979	29143466	56415145	62181722	161506231	161616197	194442478	194450721	194734602	197364074	197250608	198245722	205354120	207858463	224585008	378701110	378956827	378961304	378446556	378452020	379702467	378985803	378990524	383497864	386592901	452122974	482905775	488655589	525814491	525828993	525836946	525858952	526221561	525946078	528821047	529221018	537438394	538363806	549480584	549725767	550902565
339	16767006	16762588	29144077	56415611	62182214	161505744	161616799	194442879	194451054	194736857	197364538	197251670	198244597	205354677	207858958	224585521	378701609	378957424	378961965	378447090	378452602	379702982	378986318	378991023	383498356	386593393	452122485	482906285	488656237	525814993	525828575	525840195	525859366	526218388	525945661	528816875	529221483	537438993	538364331	549481001	549726274	550903064
342	16763618	16759218	29140768	56412501	62178798	161504653	161612601	194445739	194449417	194736191	197361436	197249032	198244535	205351565	207855746	224582076	378698207	378954037	378958375	378443681	378448541	379699449	378982770	378987633	383495051	386590120	452121465	482902779	488652790	525816101	525827730	525839311	525856642	526219176	525948315	528817938	529218959	537435603	538360808	549478336	549722952	550899649
361	16764348	16759857	29142370	56413963	62179515	161503885	161614774	194445731	194449889	194736600	197362886	197247444	198244722	205352195	207856379	224582798	378698883	378955689	378960112	378444425	378449348	379700154	378983546	378988332	383495727	386590853	452120849	482904472	488654461	525816869	525827125	525838696	525857211	526219748	525947772	528818715	529220115	537437256	538361479	549478899	549723631	550900362
369	16766621	16762088	29143577	56415255	62181834	161506111	161616336	194444547	194449991	194735750	197364185	197250015	198242333	205354227	207858574	224585123	378701226	378956940	378961419	378446712	378452146	379702587	378985924	378990637	383497980	386593011	452122857	482905895	488655700	525814602	525828902	525836848	525859044	526221656	525945981	528821161	529221103	537438506	538363925	549480682	549725886	550902681
372	16763915	16759510	29142718	56414314	62179144	161504309	161615260	194443705	194449150	194738196	197363234	197247729	198246044	205351836	207856013	224582372	378698495	378956078	378960496	378444035	378448879	379699756	378983140	378987937	383495341	386590469	452121222	482904878	488654821	525816469	525827452	525839026	525856884	526219418	525948093	528818255	529220398	537437644	538361087	549478579	549723245	550899973
384	16767001	16762594	29144083	56415606	62182209	161505749	161616794	194444773	194448518	194735458	197364533	197250700	198246101	205354682	207858953	224585516	378701604	378957429	378961970	378447085	378452597	379702977	378986313	378991018	383498351	386593389	452122490	482906280	488656242	525814988	525830574	525841289	525860398	526221794	525949065	528816880	529222678	537438998	538364326	549482315	549726269	550903059
447	16765753	16761352	29140951	56412680	62181001	161502420	161612822	194444099	194450251	194736672	197361614	197248954	198244114	205353540	207857846	224583033	378700337	378954222	378958569	378445854	378451160	379701664	378984993	378989814	383497127	386592247	452123741	482904246	488652978	525818330	525829544	525837490	525858411	526220964	525946616	528820252	529219098	537435790	538363050	549480054	549725083	550901860
452	16766617	16762084	29143573	56415251	62181830	161506115	161616332	194443058	194449560	194735866	197364181	197248355	198244865	205354223	207858570	224585119	378701222	378956936	378961415	378446708	378452142	379702583	378985920	378990633	383497976	386593007	452122861	482905891	488655696	525814598	525828905	525836851	525859041	526221653	525945984	528821157	529221100	537438502	538363921	549480679	549725882	550902677
460	16767631	16763202	29144681	56416176	62182829	161505115	161617656	194446193	194450378	194736274	197365099	197248476	198242612	205355140	207859530	224586224	378702223	378957929	378962617	378447696	378453338	379703623	378987054	378991649	383498954	386589704	452121883	482906920	488656868	525815670	525828081	525839687	525856274	526218800	525948677	528817486	529221842	537439500	538364965	549481506	549726895	550903721
465	16765671	16761269	29141035	56412759	62180915	161502511	161612923	194443648	194448944	194736612	197361693	197251639	198245350	205353459	207857762	224583168	378700254	378954310	378958666	378445771	378451065	379701576	378984906	378989730	383497045	386592152	452123831	482904159	488653069	525818231	525829626	525837567	525858336	526220887	525946693	528820163	529219168	537435878	538362959	549479977	549725000	550901778
496	16764665	16760581	29141658	56413700	62179905	161503585	161614281	194444735	194449994	194737684	197362623	197249987	198245752	205352961	207857177	224584171	378699203	378954861	378959360	378444744	378449812	379700487	378983872	378988655	383496028	386591167	452120515	482903124	488653720	525817201	525826866	525838445	525857450	526220009	525947510	528819102	529219552	537436433	538361896	549479159	549723952	550900683
498	16767539	16762971	29144458	56416088	62182738	161505231	161617431	194444767	194448085	194735822	197365014	197249113	198243014	205355060	207859443	224586054	378702132	378957845	378962381	378447608	378453234	379703531	378986964	378991557	383498867	386589615	452121975	482906826	488656631	525815577	525828145	525839753	525856209	526218734	525948743	528817323	529221780	537439413	538364872	549481441	549726803	550903633
499	16764663	16760583	29141656	56413702	62179903	161503587	161614283	194445760	194451273	194738060	197362625	197248713	198241867	205352963	207857179	224584173	378699201	378954859	378959358	378444742	378449810	379700485	378983870	378988653	383496026	386591165	452120517	482903122	488653718	525817199	525826868	525838447	525857448	526220007	525947512	528819100	529219550	537436431	538361894	549479157	549723950	550900681
505	16764000	16759583	29142644	56414241	62179222	161504205	161615169	194446422	194450567	194737133	197363164	197250205	198244857	205351911	207856089	224582456	378698576	378955996	378960413	378444117	378448973	379699841	378983226	378988021	383495423	386590551	452121145	482904791	488654741	525816556	525827382	525838957	525856956	526219487	525948022	528818342	529220342	537437563	538361167	549478645	549723326	550900056
