# Supplementary material for: Core Proteomic Analysis of Unique Metabolic Pathways of Salmonella enterica for the Identification of Potential Drug Targets
Source: PLoS One. 2016 Jan 22;11(1):e0146796. doi: 10.1371/journal.pone.0146796 (PMC4723313; doi:10.1371/journal.pone.0146796)
Supplement: S6 Table — (XLSX) [file pone.0146796.s007.xlsx]

## Sheet: S8 Table
S6 Table. Protein Identifiers and Names of 73 COPs
COP #	NCBI RefSeq ID	NCBI GI	NCBI Accession	Enzyme and Strain name
4	NC_003197	16765105	NP_460720.1	nitrate reductase 1 alpha subunit [Salmonella enterica subsp. enterica serovar Typhimurium str. LT2]
4	NC_003198	16760122	NP_455739.1	respiratory nitrate reductase 1 alpha chain [Salmonella enterica subsp. enterica serovar Typhi str. CT18]
4	NC_004631	29142107	NP_805449.1	respiratory nitrate reductase 1 subunit alpha [Salmonella enterica subsp. enterica serovar Typhi str. Ty2]
4	NC_006511	56413314	YP_150389.1	respiratory nitrate reductase 1 subunit alpha [Salmonella enterica subsp. enterica serovar Paratyphi A str. ATCC 9150]
4	NC_006905	62180328	YP_216745.1	nitrate reductase 1 subunit alpha [Salmonella enterica subsp. enterica serovar Choleraesuis str. SC-B67]
4	NC_010067	161503125	YP_001570237.1	hypothetical protein SARI_01190 [Salmonella enterica subsp. arizonae serovar 62:z4,z23:- str. RSK2980]
4	NC_010102	161613744	YP_001587709.1	hypothetical protein SPAB_01469 [Salmonella enterica subsp. enterica serovar Paratyphi B str. SPB7]
4	NC_011080	194445229	YP_002041014.1	nitrate reductase 1 subunit alpha [Salmonella enterica subsp. enterica serovar Newport str. SL254]
4	NC_011083	194450899	YP_002045807.1	nitrate reductase 1 subunit alpha [Salmonella enterica subsp. enterica serovar Heidelberg str. SL476]
4	NC_011094	194736654	YP_002114793.1	nitrate reductase 1 subunit alpha [Salmonella enterica subsp. enterica serovar Schwarzengrund str. CVM19633]
4	NC_011147	197362239	YP_002141876.1	respiratory nitrate reductase 1 subunit alpha [Salmonella enterica subsp. enterica serovar Paratyphi A str. AKU_12601]
4	NC_011149	197247994	YP_002146266.1	nitrate reductase 1 subunit alpha [Salmonella enterica subsp. enterica serovar Agona str. SL483]
4	NC_011205	198243056	YP_002215381.1	nitrate reductase 1 subunit alpha [Salmonella enterica subsp. enterica serovar Dublin str. CT_02021853]
4	NC_011274	205352568	YP_002226369.1	respiratory nitrate reductase 1 subunit alpha [Salmonella enterica subsp. enterica serovar Gallinarum str. 287/91]
4	NC_011294	207856729	YP_002243380.1	respiratory nitrate reductase 1 subunit alpha [Salmonella enterica subsp. enterica serovar Enteritidis str. P125109]
4	NC_012125	224583746	YP_002637544.1	respiratory nitrate reductase 1 subunit alpha [Salmonella enterica subsp. enterica serovar Paratyphi C strain RKS4594]
4	NC_016810	378699640	YP_005181597.1	respiratory nitrate reductase 1 subunit alpha [Salmonella enterica subsp. enterica serovar Typhimurium str. SL1344]
4	NC_016831	378955271	YP_005212758.1	respiratory nitrate reductase 1 subunit alpha [Salmonella enterica subsp. enterica serovar Gallinarum/pullorum str. RKS5078]
4	NC_016832	378959839	YP_005217325.1	Respiratory nitrate reductase 1 alpha chain [Salmonella enterica subsp. enterica serovar Typhi str. P-stx-12]
4	NC_016854	378445171	YP_005232803.1	respiratory nitrate reductase 1 subunit alpha [Salmonella enterica subsp. enterica serovar Typhimurium str. D23580]
4	NC_016856	378450332	YP_005237691.1	nitrate reductase 1 subunit alpha [Salmonella enterica subsp. enterica serovar Typhimurium str. 14028S]
4	NC_016857	379700935	YP_005242663.1	nitrate reductase 1 subunit alpha [Salmonella enterica subsp. enterica serovar Typhimurium str. ST4/74]
4	NC_016860	378984325	YP_005247480.1	nitrate reductase 1 subunit alpha [Salmonella enterica subsp. enterica serovar Typhimurium str. T000240]
4	NC_016863	378989104	YP_005252268.1	nitrate reductase 1 subunit alpha [Salmonella enterica subsp. enterica serovar Typhimurium str. UK-1]
4	NC_017046	383496455	YP_005397144.1	respiratory nitrate reductase 1 subunit alpha [Salmonella enterica subsp. enterica serovar Typhimurium str. 798]
4	NC_017623	386591598	YP_006087998.1	respiratory nitrate reductase subunit alpha [Salmonella enterica subsp. enterica serovar Heidelberg str. B182]
4	NC_020307	452120046	YP_007470294.1	nitrate reductase A subunit alpha [Salmonella enterica subsp. enterica serovar Javiana str. CFSAN001992]
4	NC_021151	482903576	YP_007902136.1	nitrate reductase A subunit alpha [Salmonella enterica subsp. enterica serovar Typhimurium str. U288]
4	NC_021176	488654188	YP_007925991.1	respiratory nitrate reductase 1 alpha chain [Salmonella enterica subsp. enterica serovar Typhi str. Ty21a]
4	NC_021810	525817650	YP_008247668.1	nitrate reductase A subunit alpha [Salmonella enterica subsp. enterica serovar Heidelberg str. 41578]
4	NC_021812	525826499	YP_008248891.1	nitrate reductase A subunit alpha [Salmonella enterica subsp. enterica serovar Heidelberg str. CFSAN002069]
4	NC_021814	525838085	YP_008255033.1	nitrate reductase A subunit alpha [Salmonella enterica subsp. enterica serovar Typhimurium var. 5- str. CFSAN001921]
4	NC_021818	525857818	YP_008260964.1	nitrate reductase A subunit alpha [Salmonella enterica subsp. enterica serovar Cubana str. CFSAN002050]
4	NC_021820	526220370	YP_008265972.1	nitrate reductase A subunit alpha [Salmonella enterica subsp. enterica serovar 4,[5],12:i:- str. 08-1736]
4	NC_021844	525947147	YP_008308456.1	nitrate reductase A subunit alpha [Salmonella enterica subsp. enterica serovar Bareilly str. CFSAN000189]
4	NC_021902	528819558	YP_008360761.1	reductase [Salmonella enterica subsp. enterica serovar Newport str. USMARC-S3124.1]
4	NC_021984	529219838	YP_008380913.1	nitrate reductase A subunit alpha [Salmonella enterica subsp. enterica serovar Pullorum str. S06004]
4	NC_022221	537436847	YP_008481224.1	respiratory nitrate reductase 1 alpha chain [Salmonella enterica subsp. enterica serovar Gallinarum/pullorum str. CDC1983-67]
4	NC_022241	538362354	YP_008505639.1	nitrate reductase 1, alpha subunit [Salmonella enterica subsp. enterica serovar Bovismorbificans str. 3114]
4	NC_022525	549479521	YP_008613547.1	nitrate reductase A subunit alpha [Salmonella enterica subsp. enterica serovar Thompson str. RM6836]
4	NC_022544	549724386	YP_008644576.1	respiratory nitrate reductase 1 alpha chain [Salmonella enterica subsp. enterica serovar Typhimurium str. DT2]
4	NC_022569	550901119	YP_008670211.1	respiratory nitrate reductase 1 alpha chain [Salmonella enterica subsp. enterica serovar Typhimurium str. DT104]
23	NC_003197	16763604	NP_459219.1	PII uridylyl-transferase [Salmonella enterica subsp. enterica serovar Typhimurium str. LT2]
23	NC_003198	16759204	NP_454821.1	[protein-PII] uridylyltransferase [Salmonella enterica subsp. enterica serovar Typhi str. CT18]
23	NC_004631	29140754	NP_804096.1	PII uridylyl-transferase [Salmonella enterica subsp. enterica serovar Typhi str. Ty2]
23	NC_006511	56412487	YP_149562.1	[protein-PII] uridylyltransferase [Salmonella enterica subsp. enterica serovar Paratyphi A str. ATCC 9150]
23	NC_006905	62178784	YP_215201.1	PII uridylyl-transferase [Salmonella enterica subsp. enterica serovar Choleraesuis str. SC-B67]
23	NC_010067	161504668	YP_001571780.1	PII uridylyl-transferase [Salmonella enterica subsp. arizonae serovar 62:z4,z23:- str. RSK2980]
23	NC_010102	161612584	YP_001586548.1	PII uridylyl-transferase [Salmonella enterica subsp. enterica serovar Paratyphi B str. SPB7]
23	NC_011080	194443587	YP_002039454.1	PII uridylyl-transferase [Salmonella enterica subsp. enterica serovar Newport str. SL254]
23	NC_011083	194448092	YP_002044204.1	PII uridylyl-transferase [Salmonella enterica subsp. enterica serovar Heidelberg str. SL476]
23	NC_011094	194736783	YP_002113237.1	PII uridylyl-transferase [Salmonella enterica subsp. enterica serovar Schwarzengrund str. CVM19633]
23	NC_011147	197361422	YP_002141058.1	PII uridylyl-transferase [Salmonella enterica subsp. enterica serovar Paratyphi A str. AKU_12601]
23	NC_011149	197248735	YP_002145219.1	PII uridylyl-transferase [Salmonella enterica subsp. enterica serovar Agona str. SL483]
23	NC_011205	198245098	YP_002214175.1	PII uridylyl-transferase [Salmonella enterica subsp. enterica serovar Dublin str. CT_02021853]
23	NC_011274	205351551	YP_002225352.1	PII uridylyl-transferase [Salmonella enterica subsp. enterica serovar Gallinarum str. 287/91]
23	NC_011294	207855731	YP_002242382.1	PII uridylyl-transferase [Salmonella enterica subsp. enterica serovar Enteritidis str. P125109]
23	NC_012125	224582062	YP_002635860.1	PII uridylyl-transferase [Salmonella enterica subsp. enterica serovar Paratyphi C strain RKS4594]
23	NC_016810	378698193	YP_005180150.1	[protein-PII] uridylyltransferase [Salmonella enterica subsp. enterica serovar Typhimurium str. SL1344]
23	NC_016831	378954022	YP_005211509.1	[protein-PII] uridylyltransferase [Salmonella enterica subsp. enterica serovar Gallinarum/pullorum str. RKS5078]
23	NC_016832	378958361	YP_005215847.1	[Protein-PII] uridylyltransferase [Salmonella enterica subsp. enterica serovar Typhi str. P-stx-12]
23	NC_016854	378443667	YP_005231299.1	PII uridylyl-transferase [Salmonella enterica subsp. enterica serovar Typhimurium str. D23580]
23	NC_016856	378448525	YP_005235884.1	PII uridylyl-transferase [Salmonella enterica subsp. enterica serovar Typhimurium str. 14028S]
23	NC_016857	379699435	YP_005241163.1	PII uridylyl-transferase [Salmonella enterica subsp. enterica serovar Typhimurium str. ST4/74]
23	NC_016860	378982756	YP_005245911.1	protein PII uridylyl-transferase [Salmonella enterica subsp. enterica serovar Typhimurium str. T000240]
23	NC_016863	378987619	YP_005250783.1	PII uridylyl-transferase [Salmonella enterica subsp. enterica serovar Typhimurium str. UK-1]
23	NC_017046	383495037	YP_005395726.1	uridylyltransferase [Salmonella enterica subsp. enterica serovar Typhimurium str. 798]
23	NC_017623	386590106	YP_006086506.1	[protein-PII] uridylyltransferase [Salmonella enterica subsp. enterica serovar Heidelberg str. B182]
23	NC_020307	452121478	YP_007471726.1	PII uridylyl-transferase [Salmonella enterica subsp. enterica serovar Javiana str. CFSAN001992]
23	NC_021151	482902765	YP_007901325.1	PII uridylyl-transferase [Salmonella enterica subsp. enterica serovar Typhimurium str. U288]
23	NC_021176	488652776	YP_007924579.1	PII uridylyl-transferase [Salmonella enterica subsp. enterica serovar Typhi str. Ty21a]
23	NC_021810	525816087	YP_008246105.1	PII uridylyl-transferase [Salmonella enterica subsp. enterica serovar Heidelberg str. 41578]
23	NC_021812	525827744	YP_008250443.1	PII uridylyl-transferase [Salmonella enterica subsp. enterica serovar Heidelberg str. CFSAN002069]
23	NC_021814	525839325	YP_008256606.1	PII uridylyl-transferase [Salmonella enterica subsp. enterica serovar Typhimurium var. 5- str. CFSAN001921]
23	NC_021818	525856628	YP_008259464.1	PII uridylyl-transferase [Salmonella enterica subsp. enterica serovar Cubana str. CFSAN002050]
23	NC_021820	526219162	YP_008264474.1	PII uridylyl-transferase [Salmonella enterica subsp. enterica serovar 4,[5],12:i:- str. 08-1736]
23	NC_021844	525948329	YP_008309931.1	PII uridylyl-transferase [Salmonella enterica subsp. enterica serovar Bareilly str. CFSAN000189]
23	NC_021902	528817923	YP_008359126.1	[Protein-PII] uridylyltransferase [Salmonella enterica subsp. enterica serovar Newport str. USMARC-S3124.1]
23	NC_021984	529218945	YP_008379792.1	PII uridylyl-transferase [Salmonella enterica subsp. enterica serovar Pullorum str. S06004]
23	NC_022221	537435588	YP_008479965.1	uridylyltransferase [Salmonella enterica subsp. enterica serovar Gallinarum/pullorum str. CDC1983-67]
23	NC_022241	538360794	YP_008504079.1	protein-P-II uridylyltransferase [Salmonella enterica subsp. enterica serovar Bovismorbificans str. 3114]
23	NC_022525	549478322	YP_008612064.1	PII uridylyl-transferase [Salmonella enterica subsp. enterica serovar Thompson str. RM6836]
23	NC_022544	549722938	YP_008643128.1	[Protein-PII] uridylyltransferase [Salmonella enterica subsp. enterica serovar Typhimurium str. DT2]
23	NC_022569	550899635	YP_008668727.1	[Protein-PII] uridylyltransferase [Salmonella enterica subsp. enterica serovar Typhimurium str. DT104]
29	NC_003197	16767384	NP_462999.1	phosphoenolpyruvate carboxylase [Salmonella enterica subsp. enterica serovar Typhimurium str. LT2]
29	NC_003198	16762323	NP_457940.1	phosphoenolpyruvate carboxylase [Salmonella enterica subsp. enterica serovar Typhi str. CT18]
29	NC_004631	29143811	NP_807153.1	phosphoenolpyruvate carboxylase [Salmonella enterica subsp. enterica serovar Typhi str. Ty2]
29	NC_006511	56415957	YP_153032.1	phosphoenolpyruvate carboxylase [Salmonella enterica subsp. enterica serovar Paratyphi A str. ATCC 9150]
29	NC_006905	62182579	YP_218996.1	phosphoenolpyruvate carboxylase [Salmonella enterica subsp. enterica serovar Choleraesuis str. SC-B67]
29	NC_010067	161505390	YP_001572502.1	phosphoenolpyruvate carboxylase [Salmonella enterica subsp. arizonae serovar 62:z4,z23:- str. RSK2980]
29	NC_010102	161617263	YP_001591228.1	phosphoenolpyruvate carboxylase [Salmonella enterica subsp. enterica serovar Paratyphi B str. SPB7]
29	NC_011080	194443060	YP_002043383.1	phosphoenolpyruvate carboxylase [Salmonella enterica subsp. enterica serovar Newport str. SL254]
29	NC_011083	194448821	YP_002048118.1	phosphoenolpyruvate carboxylase [Salmonella enterica subsp. enterica serovar Heidelberg str. SL476]
29	NC_011094	194737003	YP_002117033.1	phosphoenolpyruvate carboxylase [Salmonella enterica subsp. enterica serovar Schwarzengrund str. CVM19633]
29	NC_011147	197364884	YP_002144521.1	phosphoenolpyruvate carboxylase [Salmonella enterica subsp. enterica serovar Paratyphi A str. AKU_12601]
29	NC_011149	449785080	YP_002149042.2	phosphoenolpyruvate carboxylase [Salmonella enterica subsp. enterica serovar Agona str. SL483]
29	NC_011205	198245978	YP_002218048.1	phosphoenolpyruvate carboxylase [Salmonella enterica subsp. enterica serovar Dublin str. CT_02021853]
29	NC_011274	205354304	YP_002228105.1	phosphoenolpyruvate carboxylase [Salmonella enterica subsp. enterica serovar Gallinarum str. 287/91]
29	NC_011294	207859309	YP_002245960.1	phosphoenolpyruvate carboxylase [Salmonella enterica subsp. enterica serovar Enteritidis str. P125109]
29	NC_012125	224585933	YP_002639732.1	phosphoenolpyruvate carboxylase [Salmonella enterica subsp. enterica serovar Paratyphi C strain RKS4594]
29	NC_016810	378701977	YP_005183935.1	phosphoenolpyruvate carboxylase [Salmonella enterica subsp. enterica serovar Typhimurium str. SL1344]
29	NC_016831	378957137	YP_005214624.1	phosphoenolpyruvate carboxylase [Salmonella enterica subsp. enterica serovar Gallinarum/pullorum str. RKS5078]
29	NC_016832	378961666	YP_005219152.1	Phosphoenolpyruvate carboxylase [Salmonella enterica subsp. enterica serovar Typhi str. P-stx-12]
29	NC_016854	378447456	YP_005235088.1	phosphoenolpyruvate carboxylase [Salmonella enterica subsp. enterica serovar Typhimurium str. D23580]
29	NC_016856	378453046	YP_005240406.1	phosphoenolpyruvate carboxylase [Salmonella enterica subsp. enterica serovar Typhimurium str. 14028S]
29	NC_016857	379703366	YP_005245094.1	phosphoenolpyruvate carboxylase [Salmonella enterica subsp. enterica serovar Typhimurium str. ST4/74]
29	NC_016860	378986807	YP_005249963.1	phosphoenolpyruvate carboxylase [Salmonella enterica subsp. enterica serovar Typhimurium str. T000240]
29	NC_016863	378991401	YP_005254565.1	phosphoenolpyruvate carboxylase [Salmonella enterica subsp. enterica serovar Typhimurium str. UK-1]
29	NC_017046	383498718	YP_005399407.1	phosphoenolpyruvate carboxylase [Salmonella enterica subsp. enterica serovar Typhimurium str. 798]
29	NC_017623	386589462	YP_006085862.1	phosphoenolpyruvate carboxylase [Salmonella enterica subsp. enterica serovar Heidelberg str. B182]
29	NC_020307	452122107	YP_007472355.1	phosphoenolpyruvate carboxylase [Salmonella enterica subsp. enterica serovar Javiana str. CFSAN001992]
29	NC_021151	482906671	YP_007905231.1	phosphoenolpyruvate carboxylase [Salmonella enterica subsp. enterica serovar Typhimurium str. U288]
29	NC_021176	488655942	YP_007927745.1	phosphoenolpyruvate carboxylase [Salmonella enterica subsp. enterica serovar Typhi str. Ty21a]
29	NC_021810	525815421	YP_008245439.1	phosphoenolpyruvate carboxylase [Salmonella enterica subsp. enterica serovar Heidelberg str. 41578]
29	NC_021812	525828270	YP_008251097.1	phosphoenolpyruvate carboxylase [Salmonella enterica subsp. enterica serovar Heidelberg str. CFSAN002069]
29	NC_021814	525839878	YP_008257280.1	phosphoenolpyruvate carboxylase [Salmonella enterica subsp. enterica serovar Typhimurium var. 5- str. CFSAN001921]
29	NC_021818	525856032	YP_008258657.1	phosphoenolpyruvate carboxylase [Salmonella enterica subsp. enterica serovar Cubana str. CFSAN002050]
29	NC_021820	526218070	YP_008263149.1	phosphoenolpyruvate carboxylase [Salmonella enterica subsp. enterica serovar 4,[5],12:i:- str. 08-1736]
29	NC_021844	525948851	YP_008310607.1	phosphoenolpyruvate carboxylase [Salmonella enterica subsp. enterica serovar Bareilly str. CFSAN000189]
29	NC_021902	528821276	YP_008362479.1	Phosphoenolpyruvate carboxylase [Salmonella enterica subsp. enterica serovar Newport str. USMARC-S3124.1]
29	NC_021984	529221265	YP_008382746.1	phosphoenolpyruvate carboxylase [Salmonella enterica subsp. enterica serovar Pullorum str. S06004]
29	NC_022221	537438703	YP_008483080.1	phosphoenolpyruvate carboxylase [Salmonella enterica subsp. enterica serovar Gallinarum/pullorum str. CDC1983-67]
29	NC_022241	538364708	YP_008507993.1	phosphoenolpyruvate carboxylase [Salmonella enterica subsp. enterica serovar Bovismorbificans str. 3114]
29	NC_022525	549481316	YP_008615730.1	phosphoenolpyruvate carboxylase [Salmonella enterica subsp. enterica serovar Thompson str. RM6836]
29	NC_022544	549726647	YP_008646837.1	phosphoenolpyruvate carboxylase [Salmonella enterica subsp. enterica serovar Typhimurium str. DT2]
29	NC_022569	550903479	YP_008672571.1	phosphoenolpyruvate carboxylase [Salmonella enterica subsp. enterica serovar Typhimurium str. DT104]
31	NC_003197	228960702	NP_462396.2	peptidoglycan synthetase [Salmonella enterica subsp. enterica serovar Typhimurium str. LT2]
31	NC_003198	541470441	NP_458411.3	penicillin-binding protein 1A [Salmonella enterica subsp. enterica serovar Typhi str. CT18]
31	NC_004631	229220623	NP_807623.2	peptidoglycan synthetase [Salmonella enterica subsp. enterica serovar Typhi str. Ty2]
31	NC_006511	459642605	YP_152483.3	penicillin-binding protein 1A [Salmonella enterica subsp. enterica serovar Paratyphi A str. ATCC 9150]
31	NC_006905	229037903	YP_218412.2	peptidoglycan synthetase [Salmonella enterica subsp. enterica serovar Choleraesuis str. SC-B67]
31	NC_010067	228879514	YP_001573053.2	peptidoglycan synthetase [Salmonella enterica subsp. arizonae serovar 62:z4,z23:- str. RSK2980]
31	NC_010102	161616530	YP_001590495.1	peptidoglycan synthetase [Salmonella enterica subsp. enterica serovar Paratyphi B str. SPB7]
31	NC_011080	194446165	YP_002042743.1	peptidoglycan synthetase [Salmonella enterica subsp. enterica serovar Newport str. SL254]
31	NC_011083	194448739	YP_002047516.1	peptidoglycan synthetase [Salmonella enterica subsp. enterica serovar Heidelberg str. SL476]
31	NC_011094	194734007	YP_002116434.1	peptidoglycan synthetase [Salmonella enterica subsp. enterica serovar Schwarzengrund str. CVM19633]
31	NC_011147	197364338	YP_002143975.1	peptidoglycan synthetase [Salmonella enterica subsp. enterica serovar Paratyphi A str. AKU_12601]
31	NC_011149	197250545	YP_002148414.1	peptidoglycan synthetase [Salmonella enterica subsp. enterica serovar Agona str. SL483]
31	NC_011205	198244536	YP_002217452.1	peptidoglycan synthetase [Salmonella enterica subsp. enterica serovar Dublin str. CT_02021853]
31	NC_011274	205354883	YP_002228684.1	peptidoglycan synthetase [Salmonella enterica subsp. enterica serovar Gallinarum str. 287/91]
31	NC_011294	207858733	YP_002245384.1	peptidoglycan synthetase [Salmonella enterica subsp. enterica serovar Enteritidis str. P125109]
31	NC_012125	224585287	YP_002639086.1	peptidoglycan synthetase [Salmonella enterica subsp. enterica serovar Paratyphi C strain RKS4594]
31	NC_016810	378701387	YP_005183345.1	penicillin-binding protein 1A [Salmonella enterica subsp. enterica serovar Typhimurium str. SL1344]
31	NC_016831	378957659	YP_005215146.1	penicillin-binding protein 1A [Salmonella enterica subsp. enterica serovar Gallinarum/pullorum str. RKS5078]
31	NC_016832	378962194	YP_005219680.1	Penicillin-sensitive transpeptidase [Salmonella enterica subsp. enterica serovar Typhi str. P-stx-12]
31	NC_016854	378446869	YP_005234501.1	penicillin-binding protein 1A [Salmonella enterica subsp. enterica serovar Typhimurium str. D23580]
31	NC_016856	378452331	YP_005239691.1	peptidoglycan synthetase [Salmonella enterica subsp. enterica serovar Typhimurium str. 14028S]
31	NC_016857	379702753	YP_005244481.1	penicillin-binding protein 1A [Salmonella enterica subsp. enterica serovar Typhimurium str. ST4/74]
31	NC_016860	378986088	YP_005249244.1	peptidoglycan synthetase [Salmonella enterica subsp. enterica serovar Typhimurium str. T000240]
31	NC_016863	378990798	YP_005253962.1	peptidoglycan synthetase [Salmonella enterica subsp. enterica serovar Typhimurium str. UK-1]
31	NC_017046	383498135	YP_005398824.1	penicillin-binding protein 1A [Salmonella enterica subsp. enterica serovar Typhimurium str. 798]
31	NC_017623	386593168	YP_006089568.1	Multimodular transpeptidase-transglycosylase [Salmonella enterica subsp. enterica serovar Heidelberg str. B182]
31	NC_020307	452122695	YP_007472943.1	penicillin-binding protein 1a [Salmonella enterica subsp. enterica serovar Javiana str. CFSAN001992]
31	NC_021151	482906060	YP_007904620.1	penicillin-binding protein 1a [Salmonella enterica subsp. enterica serovar Typhimurium str. U288]
31	NC_021176	488656452	YP_007928255.1	peptidoglycan synthetase [Salmonella enterica subsp. enterica serovar Typhi str. Ty21a]
31	NC_021810	525814764	YP_008244782.1	penicillin-binding protein 1a [Salmonella enterica subsp. enterica serovar Heidelberg str. 41578]
31	NC_021812	525828764	YP_008251720.1	penicillin-binding protein 1a [Salmonella enterica subsp. enterica serovar Heidelberg str. CFSAN002069]
31	NC_021814	525840378	YP_008257891.1	penicillin-binding protein 1a [Salmonella enterica subsp. enterica serovar Typhimurium var. 5- str. CFSAN001921]
31	NC_021818	525859182	YP_008262739.1	penicillin-binding protein 1a [Salmonella enterica subsp. enterica serovar Cubana str. CFSAN002050]
31	NC_021820	526218571	YP_008263759.1	penicillin-binding protein 1a [Salmonella enterica subsp. enterica serovar 4,[5],12:i:- str. 08-1736]
31	NC_021844	525945842	YP_008306848.1	penicillin-binding protein 1a [Salmonella enterica subsp. enterica serovar Bareilly str. CFSAN000189]
31	NC_021902	528817110	YP_008358313.1	Penicillin-binding protein 1A [Salmonella enterica subsp. enterica serovar Newport str. USMARC-S3124.1]
31	NC_021984	529221642	YP_008383216.1	penicillin-binding protein 1a [Salmonella enterica subsp. enterica serovar Pullorum str. S06004]
31	NC_022221	537439226	YP_008483603.1	penicillin-binding protein 1A [Salmonella enterica subsp. enterica serovar Gallinarum/pullorum str. CDC1983-67]
31	NC_022241	538364088	YP_008507373.1	penicillin-binding protein 1A [Salmonella enterica subsp. enterica serovar Bovismorbificans str. 3114]
31	NC_022525	549480819	YP_008615130.1	penicillin-binding protein 1a [Salmonella enterica subsp. enterica serovar Thompson str. RM6836]
31	NC_022544	549726047	YP_008646237.1	penicillin-binding protein 1A [Salmonella enterica subsp. enterica serovar Typhimurium str. DT2]
31	NC_022569	550902837	YP_008671929.1	penicillin-binding protein 1A [Salmonella enterica subsp. enterica serovar Typhimurium str. DT104]
33	NC_003197	16763580	NP_459195.1	penicillin-binding protein 1b [Salmonella enterica subsp. enterica serovar Typhimurium str. LT2]
33	NC_003198	16759189	NP_454806.1	penicillin-binding protein 1b; peptidoglycan synthetase [Salmonella enterica subsp. enterica serovar Typhi str. CT18]
33	NC_004631	29140739	NP_804081.1	penicillin-binding protein 1b [Salmonella enterica subsp. enterica serovar Typhi str. Ty2]
33	NC_006511	56412466	YP_149541.1	penicillin-binding protein 1b; peptidoglycan synthetase [Salmonella enterica subsp. enterica serovar Paratyphi A str. ATCC 9150]
33	NC_006905	62178760	YP_215177.1	penicillin-binding protein 1b [Salmonella enterica subsp. enterica serovar Choleraesuis str. SC-B67]
33	NC_010067	161504685	YP_001571797.1	penicillin-binding protein 1b [Salmonella enterica subsp. arizonae serovar 62:z4,z23:- str. RSK2980]
33	NC_010102	161612551	YP_001586517.1	penicillin-binding protein 1b [Salmonella enterica subsp. enterica serovar Paratyphi B str. SPB7]
33	NC_011080	194442340	YP_002039426.1	penicillin-binding protein 1b [Salmonella enterica subsp. enterica serovar Newport str. SL254]
33	NC_011083	194450105	YP_002044175.1	penicillin-binding protein 1b [Salmonella enterica subsp. enterica serovar Heidelberg str. SL476]
33	NC_011094	194738399	YP_002113218.1	penicillin-binding protein 1b [Salmonella enterica subsp. enterica serovar Schwarzengrund str. CVM19633]
33	NC_011147	197361402	YP_002141037.1	penicillin-binding protein 1b [Salmonella enterica subsp. enterica serovar Paratyphi A str. AKU_12601]
33	NC_011149	197251303	YP_002145192.1	penicillin-binding protein 1b [Salmonella enterica subsp. enterica serovar Agona str. SL483]
33	NC_011205	198242626	YP_002214147.1	penicillin-binding protein 1b [Salmonella enterica subsp. enterica serovar Dublin str. CT_02021853]
33	NC_011274	205351529	YP_002225330.1	penicillin-binding protein 1b [Salmonella enterica subsp. enterica serovar Gallinarum str. 287/91]
33	NC_011294	207855706	YP_002242357.1	penicillin-binding protein 1b [Salmonella enterica subsp. enterica serovar Enteritidis str. P125109]
33	NC_012125	224582037	YP_002635835.1	penicillin-binding protein 1b [Salmonella enterica subsp. enterica serovar Paratyphi C strain RKS4594]
33	NC_016810	378698169	YP_005180126.1	penicillin-binding protein 1b; peptidoglycan synthetase [Salmonella enterica subsp. enterica serovar Typhimurium str. SL1344]
33	NC_016831	378953998	YP_005211485.1	penicillin-binding protein 1b, peptidoglycan synthetase [Salmonella enterica subsp. enterica serovar Gallinarum/pullorum str. RKS5078]
33	NC_016832	378958345	YP_005215831.1	Penicillin-sensitive transpeptidase [Salmonella enterica subsp. enterica serovar Typhi str. P-stx-12]
33	NC_016854	378443643	YP_005231275.1	penicillin-binding protein 1B [Salmonella enterica subsp. enterica serovar Typhimurium str. D23580]
33	NC_016856	378448498	YP_005235857.1	penicillin-binding protein 1b [Salmonella enterica subsp. enterica serovar Typhimurium str. 14028S]
33	NC_016857	379699411	YP_005241139.1	penicillin-binding protein 1b [Salmonella enterica subsp. enterica serovar Typhimurium str. ST4/74]
33	NC_016860	378982732	YP_005245887.1	penicillin-binding protein 1b [Salmonella enterica subsp. enterica serovar Typhimurium str. T000240]
33	NC_016863	378987595	YP_005250759.1	penicillin-binding protein 1b [Salmonella enterica subsp. enterica serovar Typhimurium str. UK-1]
33	NC_017046	383495013	YP_005395702.1	penicillin-binding protein 1b, peptidoglycan synthetase [Salmonella enterica subsp. enterica serovar Typhimurium str. 798]
33	NC_017623	386590083	YP_006086483.1	Multimodular transpeptidase-transglycosylase [Salmonella enterica subsp. enterica serovar Heidelberg str. B182]
33	NC_020307	452121496	YP_007471744.1	bifunctional glycosyl transferase/transpeptidase [Salmonella enterica subsp. enterica serovar Javiana str. CFSAN001992]
33	NC_021151	482902741	YP_007901301.1	bifunctional glycosyl transferase/transpeptidase [Salmonella enterica subsp. enterica serovar Typhimurium str. U288]
33	NC_021176	488652760	YP_007924563.1	penicillin-binding protein 1b [Salmonella enterica subsp. enterica serovar Typhi str. Ty21a]
33	NC_021810	525816064	YP_008246082.1	bifunctional glycosyl transferase/transpeptidase [Salmonella enterica subsp. enterica serovar Heidelberg str. 41578]
33	NC_021812	525830382	YP_008250467.1	bifunctional glycosyl transferase/transpeptidase [Salmonella enterica subsp. enterica serovar Heidelberg str. CFSAN002069]
33	NC_021814	525841103	YP_008256631.1	bifunctional glycosyl transferase/transpeptidase [Salmonella enterica subsp. enterica serovar Typhimurium var. 5- str. CFSAN001921]
33	NC_021818	525859633	YP_008259439.1	bifunctional glycosyl transferase/transpeptidase [Salmonella enterica subsp. enterica serovar Cubana str. CFSAN002050]
33	NC_021820	526221953	YP_008264450.1	bifunctional glycosyl transferase/transpeptidase [Salmonella enterica subsp. enterica serovar 4,[5],12:i:- str. 08-1736]
33	NC_021844	525949706	YP_008309955.1	bifunctional glycosyl transferase/transpeptidase [Salmonella enterica subsp. enterica serovar Bareilly str. CFSAN000189]
33	NC_021902	528817895	YP_008359098.1	Penicillin-binding protein 1B [Salmonella enterica subsp. enterica serovar Newport str. USMARC-S3124.1]
33	NC_021984	529221992	YP_008379774.1	bifunctional glycosyl transferase/transpeptidase [Salmonella enterica subsp. enterica serovar Pullorum str. S06004]
33	NC_022221	537435565	YP_008479942.1	penicillin-binding protein 1b, peptidoglycan synthetase [Salmonella enterica subsp. enterica serovar Gallinarum/pullorum str. CDC1983-67]
33	NC_022241	538360768	YP_008504053.1	penicillin-binding protein 1B [Salmonella enterica subsp. enterica serovar Bovismorbificans str. 3114]
33	NC_022525	549481699	YP_008612040.1	bifunctional glycosyl transferase/transpeptidase [Salmonella enterica subsp. enterica serovar Thompson str. RM6836]
33	NC_022544	549722914	YP_008643104.1	penicillin-binding protein 1b; peptidoglycan synthetase [Salmonella enterica subsp. enterica serovar Typhimurium str. DT2]
33	NC_022569	550899611	YP_008668703.1	penicillin-binding protein 1b; peptidoglycan synthetase [Salmonella enterica subsp. enterica serovar Typhimurium str. DT104]
40	NC_003197	16766305	NP_461920.1	fused phosphoenolpyruvate-protein phosphotransferase PtsP/GAF domain [Salmonella enterica subsp. enterica serovar Typhimurium str. LT2]
40	NC_003198	16761780	NP_457397.1	phosphoenolpyruvate-protein phosphotransferase [Salmonella enterica subsp. enterica serovar Typhi str. CT18]
40	NC_004631	29143264	NP_806606.1	fused phosphoenolpyruvate-protein phosphotransferase PtsP/GAF domain-containing protein [Salmonella enterica subsp. enterica serovar Typhi str. Ty2]
40	NC_006511	56414950	YP_152025.1	phosphoenolpyruvate-protein phosphotransferase [Salmonella enterica subsp. enterica serovar Paratyphi A str. ATCC 9150]
40	NC_006905	62181512	YP_217929.1	fused phosphoenolpyruvate-protein phosphotransferase PtsP/GAF domain [Salmonella enterica subsp. enterica serovar Choleraesuis str. SC-B67]
40	NC_010067	161506453	YP_001573565.1	fused phosphoenolpyruvate-protein phosphotransferase PtsP/GAF domain [Salmonella enterica subsp. arizonae serovar 62:z4,z23:- str. RSK2980]
40	NC_010102	161615939	YP_001589904.1	fused phosphoenolpyruvate-protein phosphotransferase PtsP/GAF domain [Salmonella enterica subsp. enterica serovar Paratyphi B str. SPB7]
40	NC_011080	194444522	YP_002042253.1	fused phosphoenolpyruvate-protein phosphotransferase PtsP/GAF domain-containing protein [Salmonella enterica subsp. enterica serovar Newport str. SL254]
40	NC_011083	194449217	YP_002046973.1	fused phosphoenolpyruvate-protein phosphotransferase PtsP/GAF domain-containing protein [Salmonella enterica subsp. enterica serovar Heidelberg str. SL476]
40	NC_011094	194734275	YP_002115953.1	fused phosphoenolpyruvate-protein phosphotransferase PtsP/GAF domain-containing protein [Salmonella enterica subsp. enterica serovar Schwarzengrund str. CVM19633]
40	NC_011147	197363879	YP_002143516.1	fused phosphoenolpyruvate-protein phosphotransferase PtsP/GAF domain-containing protein [Salmonella enterica subsp. enterica serovar Paratyphi A str. AKU_12601]
40	NC_011149	197249676	YP_002147912.1	fused phosphoenolpyruvate-protein phosphotransferase PtsP/GAF domain-containing protein [Salmonella enterica subsp. enterica serovar Agona str. SL483]
40	NC_011205	198243829	YP_002216976.1	fused phosphoenolpyruvate-protein phosphotransferase PtsP/GAF domain [Salmonella enterica subsp. enterica serovar Dublin str. CT_02021853]
40	NC_011274	205353943	YP_002227744.1	fused phosphoenolpyruvate-protein phosphotransferase PtsP/GAF domain [Salmonella enterica subsp. enterica serovar Gallinarum str. 287/91]
40	NC_011294	207858266	YP_002244917.1	fused phosphoenolpyruvate-protein phosphotransferase PtsP/GAF domain [Salmonella enterica subsp. enterica serovar Enteritidis str. P125109]
40	NC_012125	224584792	YP_002638590.1	fused phosphoenolpyruvate-protein phosphotransferase PtsP/GAF domain [Salmonella enterica subsp. enterica serovar Paratyphi C strain RKS4594]
40	NC_016810	378700913	YP_005182870.1	phosphoenolpyruvate-protein phosphotransferase [Salmonella enterica subsp. enterica serovar Typhimurium str. SL1344]
40	NC_016831	378956631	YP_005214118.1	phosphoenolpyruvate-protein phosphotransferase [Salmonella enterica subsp. enterica serovar Gallinarum/pullorum str. RKS5078]
40	NC_016832	378961082	YP_005218568.1	Phosphoenolpyruvate-protein phosphotransferase ptsP [Salmonella enterica subsp. enterica serovar Typhi str. P-stx-12]
40	NC_016854	378446358	YP_005233990.1	phosphoenolpyruvate-protein phosphotransferase [Salmonella enterica subsp. enterica serovar Typhimurium str. D23580]
40	NC_016856	378451765	YP_005239125.1	fused phosphoenolpyruvate-protein phosphotransferase PtsP/GAF domain-containing protein [Salmonella enterica subsp. enterica serovar Typhimurium str. 14028S]
40	NC_016857	379702260	YP_005243988.1	fused phosphoenolpyruvate-protein phosphotransferase PtsP/GAF domain-containing protein [Salmonella enterica subsp. enterica serovar Typhimurium str. ST4/74]
40	NC_016860	378985593	YP_005248749.1	PTS system EI protein [Salmonella enterica subsp. enterica serovar Typhimurium str. T000240]
40	NC_016863	378990324	YP_005253488.1	fused phosphoenolpyruvate-protein phosphotransferase PtsP/GAF domain-containing protein [Salmonella enterica subsp. enterica serovar Typhimurium str. UK-1]
40	NC_017046	383497671	YP_005398360.1	phosphoenolpyruvate-protein phosphotransferase [Salmonella enterica subsp. enterica serovar Typhimurium str. 798]
40	NC_017623	386592694	YP_006089094.1	Phosphocarrier protein kinase/phosphorylase, nitrogen regulation associated [Salmonella enterica subsp. enterica serovar Heidelberg str. B182]
40	NC_020307	452123179	YP_007473427.1	phosphoenolpyruvate-protein phosphotransferase [Salmonella enterica subsp. enterica serovar Javiana str. CFSAN001992]
40	NC_021151	482905565	YP_007904125.1	phosphoenolpyruvate-protein phosphotransferase [Salmonella enterica subsp. enterica serovar Typhimurium str. U288]
40	NC_021176	488655379	YP_007927182.1	fused phosphoenolpyruvate-protein phosphotransferase PtsP/GAF domain protein [Salmonella enterica subsp. enterica serovar Typhi str. Ty21a]
40	NC_021810	525814275	YP_008244293.1	phosphoenolpyruvate-protein phosphotransferase [Salmonella enterica subsp. enterica serovar Heidelberg str. 41578]
40	NC_021812	525829164	YP_008252202.1	phosphoenolpyruvate-protein phosphotransferase [Salmonella enterica subsp. enterica serovar Heidelberg str. CFSAN002069]
40	NC_021814	525837115	YP_008253821.1	phosphoenolpyruvate-protein phosphotransferase [Salmonella enterica subsp. enterica serovar Typhimurium var. 5- str. CFSAN001921]
40	NC_021818	525858769	YP_008262144.1	phosphoenolpyruvate-protein phosphotransferase [Salmonella enterica subsp. enterica serovar Cubana str. CFSAN002050]
40	NC_021820	526221393	YP_008267207.1	phosphoenolpyruvate-protein phosphotransferase [Salmonella enterica subsp. enterica serovar 4,[5],12:i:- str. 08-1736]
40	NC_021844	525946255	YP_008307374.1	phosphoenolpyruvate-protein phosphotransferase [Salmonella enterica subsp. enterica serovar Bareilly str. CFSAN000189]
40	NC_021902	528820826	YP_008362029.1	phosphotransferase [Salmonella enterica subsp. enterica serovar Newport str. USMARC-S3124.1]
40	NC_021984	529220855	YP_008382259.1	phosphoenolpyruvate-protein phosphotransferase [Salmonella enterica subsp. enterica serovar Pullorum str. S06004]
40	NC_022221	537438195	YP_008482572.1	phosphoenolpyruvate-protein phosphotransferase [Salmonella enterica subsp. enterica serovar Gallinarum/pullorum str. CDC1983-67]
40	NC_022241	538363586	YP_008506871.1	general PTS system enzyme I, transcriptional regulator with NPR and NTR proteins [Salmonella enterica subsp. enterica serovar Bovismorbificans str. 3114]
40	NC_022525	549480415	YP_008614650.1	phosphoenolpyruvate-protein phosphotransferase [Salmonella enterica subsp. enterica serovar Thompson str. RM6836]
40	NC_022544	549725571	YP_008645761.1	phosphoenolpyruvate-protein phosphotransferase [Salmonella enterica subsp. enterica serovar Typhimurium str. DT2]
40	NC_022569	550902366	YP_008671458.1	phosphoenolpyruvate-protein phosphotransferase [Salmonella enterica subsp. enterica serovar Typhimurium str. DT104]
43	NC_003197	16765665	NP_461280.1	phosphate acetyltransferase [Salmonella enterica subsp. enterica serovar Typhimurium str. LT2]
43	NC_003198	16761263	NP_456880.1	phosphate acetyltransferase [Salmonella enterica subsp. enterica serovar Typhi str. CT18]
43	NC_004631	29141041	NP_804383.1	phosphate acetyltransferase [Salmonella enterica subsp. enterica serovar Typhi str. Ty2]
43	NC_006511	56412765	YP_149840.1	phosphate acetyltransferase [Salmonella enterica subsp. enterica serovar Paratyphi A str. ATCC 9150]
43	NC_006905	62180909	YP_217326.1	phosphate acetyltransferase [Salmonella enterica subsp. enterica serovar Choleraesuis str. SC-B67]
43	NC_010067	161502518	YP_001569630.1	phosphate acetyltransferase [Salmonella enterica subsp. arizonae serovar 62:z4,z23:- str. RSK2980]
43	NC_010102	161612930	YP_001586895.1	phosphate acetyltransferase [Salmonella enterica subsp. enterica serovar Paratyphi B str. SPB7]
43	NC_011080	194443880	YP_002041600.1	phosphate acetyltransferase [Salmonella enterica subsp. enterica serovar Newport str. SL254]
43	NC_011083	194448796	YP_002046393.1	phosphate acetyltransferase [Salmonella enterica subsp. enterica serovar Heidelberg str. SL476]
43	NC_011094	194737608	YP_002115408.1	phosphate acetyltransferase [Salmonella enterica subsp. enterica serovar Schwarzengrund str. CVM19633]
43	NC_011147	197361699	YP_002141335.1	phosphate acetyltransferase [Salmonella enterica subsp. enterica serovar Paratyphi A str. AKU_12601]
43	NC_011149	197248002	YP_002147298.1	phosphate acetyltransferase [Salmonella enterica subsp. enterica serovar Agona str. SL483]
43	NC_011205	198243957	YP_002216409.1	phosphate acetyltransferase [Salmonella enterica subsp. enterica serovar Dublin str. CT_02021853]
43	NC_011274	205353453	YP_002227254.1	phosphate acetyltransferase [Salmonella enterica subsp. enterica serovar Gallinarum str. 287/91]
43	NC_011294	207857756	YP_002244407.1	phosphate acetyltransferase [Salmonella enterica subsp. enterica serovar Enteritidis str. P125109]
43	NC_012125	224583174	YP_002636972.1	phosphate acetyltransferase [Salmonella enterica subsp. enterica serovar Paratyphi C strain RKS4594]
43	NC_016810	378700248	YP_005182205.1	phosphate acetyltransferase [Salmonella enterica subsp. enterica serovar Typhimurium str. SL1344]
43	NC_016831	378954314	YP_005211801.1	phosphate acetyltransferase [Salmonella enterica subsp. enterica serovar Gallinarum/pullorum str. RKS5078]
43	NC_016832	378958672	YP_005216158.1	Phosphate acetyltransferase [Salmonella enterica subsp. enterica serovar Typhi str. P-stx-12]
43	NC_016854	378445765	YP_005233397.1	phosphate acetyltransferase [Salmonella enterica subsp. enterica serovar Typhimurium str. D23580]
43	NC_016856	378451059	YP_005238418.1	phosphate acetyltransferase [Salmonella enterica subsp. enterica serovar Typhimurium str. 14028S]
43	NC_016857	379701570	YP_005243298.1	phosphate acetyltransferase [Salmonella enterica subsp. enterica serovar Typhimurium str. ST4/74]
43	NC_016860	378984900	YP_005248055.1	phosphate acetyltransferase [Salmonella enterica subsp. enterica serovar Typhimurium str. T000240]
43	NC_016863	378989724	YP_005252888.1	phosphate acetyltransferase [Salmonella enterica subsp. enterica serovar Typhimurium str. UK-1]
43	NC_017046	383497039	YP_005397728.1	phosphate acetyltransferase [Salmonella enterica subsp. enterica serovar Typhimurium str. 798]
43	NC_017623	386592146	YP_006088546.1	phosphate acetyltransferase [Salmonella enterica subsp. enterica serovar Heidelberg str. B182]
43	NC_020307	452123837	YP_007474085.1	phosphate acetyltransferase [Salmonella enterica subsp. enterica serovar Javiana str. CFSAN001992]
43	NC_021151	482904153	YP_007902713.1	phosphate acetyltransferase [Salmonella enterica subsp. enterica serovar Typhimurium str. U288]
43	NC_021176	488653075	YP_007924878.1	phosphate acetyltransferase [Salmonella enterica subsp. enterica serovar Typhi str. Ty21a]
43	NC_021810	525818225	YP_008248243.1	phosphate acetyltransferase [Salmonella enterica subsp. enterica serovar Heidelberg str. 41578]
43	NC_021812	525829629	YP_008252773.1	phosphate acetyltransferase [Salmonella enterica subsp. enterica serovar Heidelberg str. CFSAN002069]
43	NC_021814	525837570	YP_008254411.1	phosphate acetyltransferase [Salmonella enterica subsp. enterica serovar Typhimurium var. 5- str. CFSAN001921]
43	NC_021818	525858333	YP_008261615.1	phosphate acetyltransferase [Salmonella enterica subsp. enterica serovar Cubana str. CFSAN002050]
43	NC_021820	526220884	YP_008266584.1	phosphate acetyltransferase [Salmonella enterica subsp. enterica serovar 4,[5],12:i:- str. 08-1736]
43	NC_021844	525946696	YP_008307911.1	phosphate acetyltransferase [Salmonella enterica subsp. enterica serovar Bareilly str. CFSAN000189]
43	NC_021902	528820157	YP_008361360.1	Phosphate acetyltransferase [Salmonella enterica subsp. enterica serovar Newport str. USMARC-S3124.1]
43	NC_021984	529219171	YP_008380058.1	phosphate acetyltransferase [Salmonella enterica subsp. enterica serovar Pullorum str. S06004]
43	NC_022221	537435883	YP_008480260.1	phosphate acetyltransferase [Salmonella enterica subsp. enterica serovar Gallinarum/pullorum str. CDC1983-67]
43	NC_022241	538362953	YP_008506238.1	hypothetical protein BN855_24210 [Salmonella enterica subsp. enterica serovar Bovismorbificans str. 3114]
43	NC_022525	549479974	YP_008614109.1	phosphate acetyltransferase [Salmonella enterica subsp. enterica serovar Thompson str. RM6836]
43	NC_022544	549724994	YP_008645184.1	phosphate acetyltransferase [Salmonella enterica subsp. enterica serovar Typhimurium str. DT2]
43	NC_022569	550901772	YP_008670864.1	phosphate acetyltransferase [Salmonella enterica subsp. enterica serovar Typhimurium str. DT104]
49	NC_003197	16765263	NP_460878.1	chemotaxis protein CheA [Salmonella enterica subsp. enterica serovar Typhimurium str. LT2]
49	NC_003198	16760870	NP_456487.1	chemotaxis protein CheA [Salmonella enterica subsp. enterica serovar Typhi str. CT18]
49	NC_004631	29141438	NP_804780.1	chemotaxis protein CheA [Salmonella enterica subsp. enterica serovar Typhi str. Ty2]
49	NC_006511	56413160	YP_150235.1	chemotaxis protein CheA [Salmonella enterica subsp. enterica serovar Paratyphi A str. ATCC 9150]
49	NC_006905	62180498	YP_216915.1	chemotaxis protein CheA [Salmonella enterica subsp. enterica serovar Choleraesuis str. SC-B67]
49	NC_010067	161502957	YP_001570069.1	chemotaxis protein CheA [Salmonella enterica subsp. arizonae serovar 62:z4,z23:- str. RSK2980]
49	NC_010102	161613519	YP_001587484.1	chemotaxis protein CheA [Salmonella enterica subsp. enterica serovar Paratyphi B str. SPB7]
49	NC_011080	194445685	YP_002041188.1	chemotaxis protein CheA [Salmonella enterica subsp. enterica serovar Newport str. SL254]
49	NC_011083	194448904	YP_002045976.1	chemotaxis protein CheA [Salmonella enterica subsp. enterica serovar Heidelberg str. SL476]
49	NC_011094	194734522	YP_002114958.1	chemotaxis protein CheA [Salmonella enterica subsp. enterica serovar Schwarzengrund str. CVM19633]
49	NC_011147	197362086	YP_002141723.1	chemotaxis protein CheA [Salmonella enterica subsp. enterica serovar Paratyphi A str. AKU_12601]
49	NC_011149	197250190	YP_002146099.1	chemotaxis protein CheA [Salmonella enterica subsp. enterica serovar Agona str. SL483]
49	NC_011205	198243368	YP_002215161.1	chemotaxis protein CheA [Salmonella enterica subsp. enterica serovar Dublin str. CT_02021853]
49	NC_011274	205352376	YP_002226177.1	chemotaxis protein CheA [Salmonella enterica subsp. enterica serovar Gallinarum str. 287/91]
49	NC_011294	207856558	YP_002243209.1	chemotaxis protein CheA [Salmonella enterica subsp. enterica serovar Enteritidis str. P125109]
49	NC_012125	224583575	YP_002637373.1	chemotaxis protein CheA [Salmonella enterica subsp. enterica serovar Paratyphi C strain RKS4594]
49	NC_016810	378699793	YP_005181750.1	chemotaxis protein CheA [Salmonella enterica subsp. enterica serovar Typhimurium str. SL1344]
49	NC_016831	378955484	YP_005212971.1	chemotaxis protein CheA [Salmonella enterica subsp. enterica serovar Gallinarum/pullorum str. RKS5078]
49	NC_016832	378959111	YP_005216597.1	hypothetical protein STBHUCCB_10250 [Salmonella enterica subsp. enterica serovar Typhi str. P-stx-12]
49	NC_016854	378445312	YP_005232944.1	chemotaxis protein CheA [Salmonella enterica subsp. enterica serovar Typhimurium str. D23580]
49	NC_016856	378450530	YP_005237889.1	chemotaxis protein CheA [Salmonella enterica subsp. enterica serovar Typhimurium str. 14028S]
49	NC_016857	379701106	YP_005242834.1	chemotaxis protein CheA [Salmonella enterica subsp. enterica serovar Typhimurium str. ST4/74]
49	NC_016860	378984487	YP_005247642.1	chemotaxis protein CheA [Salmonella enterica subsp. enterica serovar Typhimurium str. T000240]
49	NC_016863	378989267	YP_005252431.1	chemotaxis protein CheA [Salmonella enterica subsp. enterica serovar Typhimurium str. UK-1]
49	NC_017046	383496600	YP_005397289.1	chemotaxis protein CheA [Salmonella enterica subsp. enterica serovar Typhimurium str. 798]
49	NC_017623	386591758	YP_006088158.1	signal transduction histidine kinase [Salmonella enterica subsp. enterica serovar Heidelberg str. B182]
49	NC_020307	452119880	YP_007470128.1	chemotaxis protein CheA [Salmonella enterica subsp. enterica serovar Javiana str. CFSAN001992]
49	NC_021151	482903742	YP_007902302.1	chemotaxis protein CheA [Salmonella enterica subsp. enterica serovar Typhimurium str. U288]
49	NC_021176	488653491	YP_007925294.1	chemotaxis protein CheA [Salmonella enterica subsp. enterica serovar Typhi str. Ty21a]
49	NC_021810	525817817	YP_008247835.1	chemotaxis protein CheA [Salmonella enterica subsp. enterica serovar Heidelberg str. 41578]
49	NC_021812	559997190	YP_008253173.2	chemotaxis protein CheA [Salmonella enterica subsp. enterica serovar Heidelberg str. CFSAN002069]
49	NC_021814	525837958	YP_008254871.1	chemotaxis protein CheA [Salmonella enterica subsp. enterica serovar Typhimurium var. 5- str. CFSAN001921]
49	NC_021818	525857998	YP_008261190.1	chemotaxis protein CheA [Salmonella enterica subsp. enterica serovar Cubana str. CFSAN002050]
49	NC_021820	526220497	YP_008266130.1	chemotaxis protein CheA [Salmonella enterica subsp. enterica serovar 4,[5],12:i:- str. 08-1736]
49	NC_021844	525947020	YP_008308295.1	chemotaxis protein CheA [Salmonella enterica subsp. enterica serovar Bareilly str. CFSAN000189]
49	NC_021902	528819734	YP_008360937.1	Chemotaxis protein CheA [Salmonella enterica subsp. enterica serovar Newport str. USMARC-S3124.1]
49	NC_021984	529219979	YP_008381117.1	chemotaxis protein CheA [Salmonella enterica subsp. enterica serovar Pullorum str. S06004]
49	NC_022221	537437051	YP_008481428.1	chemotaxis protein CheA [Salmonella enterica subsp. enterica serovar Gallinarum/pullorum str. CDC1983-67]
49	NC_022241	538362544	YP_008505829.1	hypothetical protein BN855_20090 [Salmonella enterica subsp. enterica serovar Bovismorbificans str. 3114]
49	NC_022525	549479649	YP_008613704.1	chemotaxis protein CheA [Salmonella enterica subsp. enterica serovar Thompson str. RM6836]
49	NC_022544	549724546	YP_008644736.1	chemotaxis protein CheA [Salmonella enterica subsp. enterica serovar Typhimurium str. DT2]
49	NC_022569	550901320	YP_008670412.1	chemotaxis protein CheA [Salmonella enterica subsp. enterica serovar Typhimurium str. DT104]
50	NC_003197	16766970	NP_462585.1	mannitol-specific enzyme IIABC component [Salmonella enterica subsp. enterica serovar Typhimurium str. LT2]
50	NC_003198	16762624	NP_458241.1	mannitol-specific enzyme II of phosphotransferase system [Salmonella enterica subsp. enterica serovar Typhi str. CT18]
50	NC_004631	29144113	NP_807455.1	PTS system mannitol-specific transporter subunit II [Salmonella enterica subsp. enterica serovar Typhi str. Ty2]
50	NC_006511	56415577	YP_152652.1	mannitol-specific enzyme II of phosphotransferase system [Salmonella enterica subsp. enterica serovar Paratyphi A str. ATCC 9150]
50	NC_006905	62182179	YP_218596.1	PTS family, mannitol-specific enzyme IIABC components [Salmonella enterica subsp. enterica serovar Choleraesuis str. SC-B67]
50	NC_010067	161505779	YP_001572891.1	hypothetical protein SARI_03955 [Salmonella enterica subsp. arizonae serovar 62:z4,z23:- str. RSK2980]
50	NC_010102	161616759	YP_001590724.1	hypothetical protein SPAB_04578 [Salmonella enterica subsp. enterica serovar Paratyphi B str. SPB7]
50	NC_011080	194442311	YP_002042933.1	PTS system mannitol-specific transporter subunit IICBA [Salmonella enterica subsp. enterica serovar Newport str. SL254]
50	NC_011083	194449488	YP_002047714.1	PTS system mannitol-specific transporter subunit IICBA [Salmonella enterica subsp. enterica serovar Heidelberg str. SL476]
50	NC_011094	194737376	YP_002116621.1	PTS system mannitol-specific transporter subunit IICBA [Salmonella enterica subsp. enterica serovar Schwarzengrund str. CVM19633]
50	NC_011147	197364504	YP_002144141.1	mannitol-specific enzyme II of phosphotransferase system [Salmonella enterica subsp. enterica serovar Paratyphi A str. AKU_12601]
50	NC_011149	197247504	YP_002148616.1	PTS system mannitol-specific transporter subunit IICBA [Salmonella enterica subsp. enterica serovar Agona str. SL483]
50	NC_011205	198244431	YP_002217646.1	PTS system mannitol-specific transporter subunit EIICBA [Salmonella enterica subsp. enterica serovar Dublin str. CT_02021853]
50	NC_011274	205354711	YP_002228512.1	mannitol-specific enzyme II of phosphotransferase system [Salmonella enterica subsp. enterica serovar Gallinarum str. 287/91]
50	NC_011294	207858922	YP_002245573.1	mannitol-specific enzyme II of phosphotransferase system [Salmonella enterica subsp. enterica serovar Enteritidis str. P125109]
50	NC_012125	224585484	YP_002639283.1	mannitol-specific enzyme II of phosphotransferase system [Salmonella enterica subsp. enterica serovar Paratyphi C strain RKS4594]
50	NC_016810	378701572	YP_005183530.1	mannitol-specific enzyme II of phosphotransferase system [Salmonella enterica subsp. enterica serovar Typhimurium str. SL1344]
50	NC_016831	378957460	YP_005214947.1	mannitol-specific enzyme II of phosphotransferase system [Salmonella enterica subsp. enterica serovar Gallinarum/pullorum str. RKS5078]
50	NC_016832	378962001	YP_005219487.1	Mannitol-specific phosphotransferase enzyme IIA component [Salmonella enterica subsp. enterica serovar Typhi str. P-stx-12]
50	NC_016854	378447054	YP_005234686.1	mannitol-specific enzyme II of phosphotransferase system [Salmonella enterica subsp. enterica serovar Typhimurium str. D23580]
50	NC_016856	378452563	YP_005239923.1	mannitol-specific enzyme IIABC component [Salmonella enterica subsp. enterica serovar Typhimurium str. 14028S]
50	NC_016857	379702946	YP_005244674.1	PTS system mannitol-specific EIICBA component [Salmonella enterica subsp. enterica serovar Typhimurium str. ST4/74]
50	NC_016860	378986282	YP_005249438.1	mannitol-specific PTS system EIICBA protein [Salmonella enterica subsp. enterica serovar Typhimurium str. T000240]
50	NC_016863	378990987	YP_005254151.1	mannitol-specific enzyme IIABC component [Salmonella enterica subsp. enterica serovar Typhimurium str. UK-1]
50	NC_017046	383498319	YP_005399008.1	mannitol-specific enzyme II of phosphotransferase system [Salmonella enterica subsp. enterica serovar Typhimurium str. 798]
50	NC_017623	386593358	YP_006089758.1	PTS system mannitol-specific transporter subunit IIC [Salmonella enterica subsp. enterica serovar Heidelberg str. B182]
50	NC_020307	452122517	YP_007472765.1	PTS system mannitol-specific transporter subunit IICBA [Salmonella enterica subsp. enterica serovar Javiana str. CFSAN001992]
50	NC_021151	482906250	YP_007904810.1	PTS system mannitol-specific transporter subunit IICBA [Salmonella enterica subsp. enterica serovar Typhimurium str. U288]
50	NC_021176	488656272	YP_007928075.1	pts system mannitol-specific eiicba component [Salmonella enterica subsp. enterica serovar Typhi str. Ty21a]
50	NC_021810	525814957	YP_008244975.1	PTS system mannitol-specific transporter subunit IICBA [Salmonella enterica subsp. enterica serovar Heidelberg str. 41578]
50	NC_021812	525830578	YP_008251503.1	PTS mannitol transporter subunit IIABC [Salmonella enterica subsp. enterica serovar Heidelberg str. CFSAN002069]
50	NC_021814	525841293	YP_008257701.1	PTS mannitol transporter subunit IIABC [Salmonella enterica subsp. enterica serovar Typhimurium var. 5- str. CFSAN001921]
50	NC_021818	525860394	YP_008262929.1	PTS mannitol transporter subunit IIABC [Salmonella enterica subsp. enterica serovar Cubana str. CFSAN002050]
50	NC_021820	526221798	YP_008263572.1	PTS mannitol transporter subunit IIABC [Salmonella enterica subsp. enterica serovar 4,[5],12:i:- str. 08-1736]
50	NC_021844	525949069	YP_008306658.1	PTS mannitol transporter subunit IIABC [Salmonella enterica subsp. enterica serovar Bareilly str. CFSAN000189]
50	NC_021902	528816914	YP_008358117.1	PTS system mannitol-specific EIICBA component [Salmonella enterica subsp. enterica serovar Newport str. USMARC-S3124.1]
50	NC_021984	529222682	YP_008383048.1	PTS mannitol transporter subunit IIABC [Salmonella enterica subsp. enterica serovar Pullorum str. S06004]
50	NC_022221	537439028	YP_008483405.1	mannitol-specific enzyme II of phosphotransferase system [Salmonella enterica subsp. enterica serovar Gallinarum/pullorum str. CDC1983-67]
50	NC_022241	538364293	YP_008507578.1	pts system mannitol-specific eiicba component [Salmonella enterica subsp. enterica serovar Bovismorbificans str. 3114]
50	NC_022525	549482311	YP_008615322.1	PTS mannitol transporter subunit IIABC [Salmonella enterica subsp. enterica serovar Thompson str. RM6836]
50	NC_022544	549726236	YP_008646426.1	mannitol-specific enzyme II of phosphotransferase system [Salmonella enterica subsp. enterica serovar Typhimurium str. DT2]
50	NC_022569	550903027	YP_008672119.1	mannitol-specific enzyme II of phosphotransferase system [Salmonella enterica subsp. enterica serovar Typhimurium str. DT104]
65	NC_003197	16763512	NP_459127.1	division specific transpeptidase [Salmonella enterica subsp. enterica serovar Typhimurium str. LT2]
65	NC_003198	16759117	NP_454734.1	penicillin-binding protein 3 precursor [Salmonella enterica subsp. enterica serovar Typhi str. CT18]
65	NC_004631	29140667	NP_804009.1	penicillin-binding protein 3 [Salmonella enterica subsp. enterica serovar Typhi str. Ty2]
65	NC_006511	56412394	YP_149469.1	penicillin-binding protein 3 [Salmonella enterica subsp. enterica serovar Paratyphi A str. ATCC 9150]
65	NC_006905	62178689	YP_215106.1	division specific transpeptidase, penicillin-binding protein 3 re [Salmonella enterica subsp. enterica serovar Choleraesuis str. SC-B67]
65	NC_010067	161504756	YP_001571868.1	hypothetical protein SARI_02879 [Salmonella enterica subsp. arizonae serovar 62:z4,z23:- str. RSK2980]
65	NC_010102	161612466	YP_001586431.1	hypothetical protein SPAB_00156 [Salmonella enterica subsp. enterica serovar Paratyphi B str. SPB7]
65	NC_011080	194446375	YP_002039354.1	peptidoglycan synthetase FtsI [Salmonella enterica subsp. enterica serovar Newport str. SL254]
65	NC_011083	194450364	YP_002044092.1	peptidoglycan synthetase FtsI [Salmonella enterica subsp. enterica serovar Heidelberg str. SL476]
65	NC_011094	194734823	YP_002113140.1	peptidoglycan synthetase FtsI [Salmonella enterica subsp. enterica serovar Schwarzengrund str. CVM19633]
65	NC_011147	197361330	YP_002140965.1	penicillin-binding protein 3 [Salmonella enterica subsp. enterica serovar Paratyphi A str. AKU_12601]
65	NC_011149	197249986	YP_002145108.1	peptidoglycan synthetase FtsI [Salmonella enterica subsp. enterica serovar Agona str. SL483]
65	NC_011205	198245181	YP_002214074.1	peptidoglycan synthetase FtsI [Salmonella enterica subsp. enterica serovar Dublin str. CT_02021853]
65	NC_011274	205351461	YP_002225262.1	penicillin-binding protein 3 [Salmonella enterica subsp. enterica serovar Gallinarum str. 287/91]
65	NC_011294	207855636	YP_002242287.1	penicillin-binding protein 3 [Salmonella enterica subsp. enterica serovar Enteritidis str. P125109]
65	NC_012125	224581965	YP_002635763.1	penicillin-binding protein 3 [Salmonella enterica subsp. enterica serovar Paratyphi C strain RKS4594]
65	NC_016810	378698102	YP_005180059.1	penicillin-binding protein 3 [Salmonella enterica subsp. enterica serovar Typhimurium str. SL1344]
65	NC_016831	378953926	YP_005211413.1	penicillin-binding protein 3 [Salmonella enterica subsp. enterica serovar Gallinarum/pullorum str. RKS5078]
65	NC_016832	378958269	YP_005215755.1	Division-specific transpeptidase [Salmonella enterica subsp. enterica serovar Typhi str. P-stx-12]
65	NC_016854	378443576	YP_005231208.1	penicillin-binding protein 3 [Salmonella enterica subsp. enterica serovar Typhimurium str. D23580]
65	NC_016856	378448422	YP_005235781.1	division specific transpeptidase [Salmonella enterica subsp. enterica serovar Typhimurium str. 14028S]
65	NC_016857	379699343	YP_005241071.1	penicillin-binding protein 3 [Salmonella enterica subsp. enterica serovar Typhimurium str. ST4/74]
65	NC_016860	378982663	YP_005245818.1	peptidoglycan synthetase FtsI [Salmonella enterica subsp. enterica serovar Typhimurium str. T000240]
65	NC_016863	378987528	YP_005250692.1	division specific transpeptidase [Salmonella enterica subsp. enterica serovar Typhimurium str. UK-1]
65	NC_017046	383494944	YP_005395633.1	penicillin-binding protein 3 [Salmonella enterica subsp. enterica serovar Typhimurium str. 798]
65	NC_017623	386590001	YP_006086401.1	cell division protein FtsI [Salmonella enterica subsp. enterica serovar Heidelberg str. B182]
65	NC_020307	452121573	YP_007471821.1	peptidoglycan synthase FtsI [Salmonella enterica subsp. enterica serovar Javiana str. CFSAN001992]
65	NC_021151	482902671	YP_007901231.1	peptidoglycan synthase FtsI [Salmonella enterica subsp. enterica serovar Typhimurium str. U288]
65	NC_021176	488652687	YP_007924490.1	peptidoglycan synthetase FtsI [Salmonella enterica subsp. enterica serovar Typhi str. Ty21a]
65	NC_021810	525815979	YP_008245997.1	peptidoglycan synthase FtsI [Salmonella enterica subsp. enterica serovar Heidelberg str. 41578]
65	NC_021812	525827830	YP_008250550.1	cell division protein FtsI [Salmonella enterica subsp. enterica serovar Heidelberg str. CFSAN002069]
65	NC_021814	525839411	YP_008256701.1	cell division protein FtsI [Salmonella enterica subsp. enterica serovar Typhimurium var. 5- str. CFSAN001921]
65	NC_021818	525856542	YP_008259354.1	cell division protein FtsI [Salmonella enterica subsp. enterica serovar Cubana str. CFSAN002050]
65	NC_021820	526219075	YP_008264381.1	cell division protein FtsI [Salmonella enterica subsp. enterica serovar 4,[5],12:i:- str. 08-1736]
65	NC_021844	525948415	YP_008310039.1	cell division protein FtsI [Salmonella enterica subsp. enterica serovar Bareilly str. CFSAN000189]
65	NC_021902	528817821	YP_008359024.1	Transpeptidase involved in septal peptidoglycan synthesis (Penicillin-binding protein 3) [Salmonella enterica subsp. enterica serovar Newport str. USMARC-S3124.1]
65	NC_021984	529218873	YP_008379710.1	cell division protein FtsI [Salmonella enterica subsp. enterica serovar Pullorum str. S06004]
65	NC_022221	537435492	YP_008479869.1	penicillin-binding protein 3 precursor [Salmonella enterica subsp. enterica serovar Gallinarum/pullorum str. CDC1983-67]
65	NC_022241	538360693	YP_008503978.1	peptidoglycan synthetase FtsI [Salmonella enterica subsp. enterica serovar Bovismorbificans str. 3114]
65	NC_022525	549478236	YP_008611955.1	cell division protein FtsI [Salmonella enterica subsp. enterica serovar Thompson str. RM6836]
65	NC_022544	549722847	YP_008643037.1	penicillin-binding protein 3 precursor [Salmonella enterica subsp. enterica serovar Typhimurium str. DT2]
65	NC_022569	550899547	YP_008668639.1	penicillin-binding protein 3 precursor [Salmonella enterica subsp. enterica serovar Typhimurium str. DT104]
67	NC_003197	16765177	NP_460792.1	penicillin-binding protein 3 [Salmonella enterica subsp. enterica serovar Typhimurium str. LT2]
67	NC_003198	16760725	NP_456342.1	penicillin-binding protein [Salmonella enterica subsp. enterica serovar Typhi str. CT18]
67	NC_004631	29141517	NP_804859.1	penicillin-binding protein [Salmonella enterica subsp. enterica serovar Typhi str. Ty2]
67	NC_006511	56413245	YP_150320.1	penicillin-binding protein [Salmonella enterica subsp. enterica serovar Paratyphi A str. ATCC 9150]
67	NC_006905	62180400	YP_216817.1	penicillin-binding protein-3 [Salmonella enterica subsp. enterica serovar Choleraesuis str. SC-B67]
67	NC_010067	161503040	YP_001570152.1	hypothetical protein SARI_01104 [Salmonella enterica subsp. arizonae serovar 62:z4,z23:- str. RSK2980]
67	NC_010102	161613654	YP_001587619.1	hypothetical protein SPAB_01378 [Salmonella enterica subsp. enterica serovar Paratyphi B str. SPB7]
67	NC_011080	194442429	YP_002041092.1	peptidoglycan synthetase FtsI [Salmonella enterica subsp. enterica serovar Newport str. SL254]
67	NC_011083	194447947	YP_002045882.1	peptidoglycan synthetase FtsI [Salmonella enterica subsp. enterica serovar Heidelberg str. SL476]
67	NC_011094	194735872	YP_002114870.1	peptidoglycan synthetase FtsI [Salmonella enterica subsp. enterica serovar Schwarzengrund str. CVM19633]
67	NC_011147	197362171	YP_002141808.1	penicillin-binding protein [Salmonella enterica subsp. enterica serovar Paratyphi A str. AKU_12601]
67	NC_011149	197247470	YP_002146188.1	peptidoglycan synthetase FtsI [Salmonella enterica subsp. enterica serovar Agona str. SL483]
67	NC_011205	198244061	YP_002215304.1	peptidoglycan synthetase FtsI [Salmonella enterica subsp. enterica serovar Dublin str. CT_02021853]
67	NC_011274	205352500	YP_002226301.1	penicillin-binding protein [Salmonella enterica subsp. enterica serovar Gallinarum str. 287/91]
67	NC_011294	207856658	YP_002243309.1	penicillin-binding protein [Salmonella enterica subsp. enterica serovar Enteritidis str. P125109]
67	NC_012125	224583674	YP_002637472.1	penicillin-binding protein [Salmonella enterica subsp. enterica serovar Paratyphi C strain RKS4594]
67	NC_016810	378699712	YP_005181669.1	penicillin-binding protein [Salmonella enterica subsp. enterica serovar Typhimurium str. SL1344]
67	NC_016831	378955342	YP_005212829.1	penicillin-binding protein [Salmonella enterica subsp. enterica serovar Gallinarum/pullorum str. RKS5078]
67	NC_016832	378959199	YP_005216685.1	Division-specific transpeptidase [Salmonella enterica subsp. enterica serovar Typhi str. P-stx-12]
67	NC_016854	378445242	YP_005232874.1	penicillin-binding protein [Salmonella enterica subsp. enterica serovar Typhimurium str. D23580]
67	NC_016856	378450418	YP_005237777.1	putative penicillin-binding protein 3 [Salmonella enterica subsp. enterica serovar Typhimurium str. 14028S]
67	NC_016857	379701012	YP_005242740.1	penicillin-binding protein [Salmonella enterica subsp. enterica serovar Typhimurium str. ST4/74]
67	NC_016860	378984397	YP_005247552.1	penicillin-binding protein [Salmonella enterica subsp. enterica serovar Typhimurium str. T000240]
67	NC_016863	378989176	YP_005252340.1	putative penicillin-binding protein 3 [Salmonella enterica subsp. enterica serovar Typhimurium str. UK-1]
67	NC_017046	383496524	YP_005397213.1	penicillin-binding protein [Salmonella enterica subsp. enterica serovar Typhimurium str. 798]
67	NC_017623	386591665	YP_006088065.1	cell division protein FtsI [Salmonella enterica subsp. enterica serovar Heidelberg str. B182]
67	NC_020307	452119974	YP_007470222.1	penicillin-binding protein [Salmonella enterica subsp. enterica serovar Javiana str. CFSAN001992]
67	NC_021151	482903647	YP_007902207.1	penicillin-binding protein [Salmonella enterica subsp. enterica serovar Typhimurium str. U288]
67	NC_021176	488653576	YP_007925379.1	penicillin-binding protein [Salmonella enterica subsp. enterica serovar Typhi str. Ty21a]
67	NC_021810	525817722	YP_008247740.1	penicillin-binding protein [Salmonella enterica subsp. enterica serovar Heidelberg str. 41578]
67	NC_021812	525830030	YP_008253260.1	cell division protein FtsI [Salmonella enterica subsp. enterica serovar Heidelberg str. CFSAN002069]
67	NC_021814	525838019	YP_008254962.1	cell division protein FtsI [Salmonella enterica subsp. enterica serovar Typhimurium var. 5- str. CFSAN001921]
67	NC_021818	525857884	YP_008261037.1	cell division protein FtsI [Salmonella enterica subsp. enterica serovar Cubana str. CFSAN002050]
67	NC_021820	526220436	YP_008266044.1	cell division protein FtsI [Salmonella enterica subsp. enterica serovar 4,[5],12:i:- str. 08-1736]
67	NC_021844	525947081	YP_008308384.1	cell division protein FtsI [Salmonella enterica subsp. enterica serovar Bareilly str. CFSAN000189]
67	NC_021902	528819634	YP_008360837.1	Division-specific transpeptidase [Salmonella enterica subsp. enterica serovar Newport str. USMARC-S3124.1]
67	NC_021984	529219894	YP_008380977.1	cell division protein FtsI [Salmonella enterica subsp. enterica serovar Pullorum str. S06004]
67	NC_022221	537436919	YP_008481296.1	penicillin-binding protein [Salmonella enterica subsp. enterica serovar Gallinarum/pullorum str. CDC1983-67]
67	NC_022241	538362430	YP_008505715.1	hypothetical protein BN855_18930 [Salmonella enterica subsp. enterica serovar Bovismorbificans str. 3114]
67	NC_022525	549479587	YP_008613619.1	cell division protein FtsI [Salmonella enterica subsp. enterica serovar Thompson str. RM6836]
67	NC_022544	549724456	YP_008644646.1	penicillin-binding protein [Salmonella enterica subsp. enterica serovar Typhimurium str. DT2]
67	NC_022569	550901191	YP_008670283.1	penicillin-binding protein [Salmonella enterica subsp. enterica serovar Typhimurium str. DT104]
74	NC_003197	16765534	NP_461149.1	PTS system fructose-specific transporter subunit IIBC [Salmonella enterica subsp. enterica serovar Typhimurium str. LT2]
74	NC_003198	16761145	NP_456762.1	PTS system, fructose-specific IIBC component [Salmonella enterica subsp. enterica serovar Typhi str. CT18]
74	NC_004631	29141161	NP_804503.1	PTS system fructose-specific transporter subunits IIBC [Salmonella enterica subsp. enterica serovar Typhi str. Ty2]
74	NC_006511	56412884	YP_149959.1	PTS system fructose-specific transporter subunit IIBC [Salmonella enterica subsp. enterica serovar Paratyphi A str. ATCC 9150]
74	NC_006905	62180790	YP_217207.1	PTS system fructose-specific transporter subunit IIBC [Salmonella enterica subsp. enterica serovar Choleraesuis str. SC-B67]
74	NC_010067	161502634	YP_001569746.1	PTS system fructose-specific transporter subunits IIBC [Salmonella enterica subsp. arizonae serovar 62:z4,z23:- str. RSK2980]
74	NC_010102	161613096	YP_001587061.1	PTS system fructose-specific transporter subunits IIBC [Salmonella enterica subsp. enterica serovar Paratyphi B str. SPB7]
74	NC_011080	194444019	YP_002041477.1	PTS system fructose-specific transporter subunit IIBC [Salmonella enterica subsp. enterica serovar Newport str. SL254]
74	NC_011083	194448283	YP_002046258.1	PTS system fructose-specific transporter subunit IIBC [Salmonella enterica subsp. enterica serovar Heidelberg str. SL476]
74	NC_011094	194738383	YP_002115293.1	PTS system fructose-specific transporter subunit IIBC [Salmonella enterica subsp. enterica serovar Schwarzengrund str. CVM19633]
74	NC_011147	197361815	YP_002141451.1	PTS system fructose-specific transporter subunit IIBC [Salmonella enterica subsp. enterica serovar Paratyphi A str. AKU_12601]
74	NC_011149	197248030	YP_002147177.1	PTS system fructose-specific transporter subunit IIBC [Salmonella enterica subsp. enterica serovar Agona str. SL483]
74	NC_011205	198244051	YP_002216287.1	PTS system fructose-specific transporter subunits IIBC [Salmonella enterica subsp. enterica serovar Dublin str. CT_02021853]
74	NC_011274	205353338	YP_002227139.1	PTS system fructose-specific transporter subunits IIBC [Salmonella enterica subsp. enterica serovar Gallinarum str. 287/91]
74	NC_011294	207857638	YP_002244289.1	PTS system fructose-specific transporter subunit IIBC [Salmonella enterica subsp. enterica serovar Enteritidis str. P125109]
74	NC_012125	224583298	YP_002637096.1	PTS system fructose-specific transporter subunits IIBC [Salmonella enterica subsp. enterica serovar Paratyphi C strain RKS4594]
74	NC_016810	378700117	YP_005182074.1	PTS system fructose-specific transporter subunit IIBC [Salmonella enterica subsp. enterica serovar Typhimurium str. SL1344]
74	NC_016831	378954435	YP_005211922.1	PTS system fructose-specific transporter subunit IIBC [Salmonella enterica subsp. enterica serovar Gallinarum/pullorum str. RKS5078]
74	NC_016832	378958801	YP_005216287.1	Fructose permease IIC component [Salmonella enterica subsp. enterica serovar Typhi str. P-stx-12]
74	NC_016854	378445639	YP_005233271.1	pts system, fructose-specific IIbc component [Salmonella enterica subsp. enterica serovar Typhimurium str. D23580]
74	NC_016856	378450901	YP_005238260.1	PTS system fructose-specific transporter subunit IIBC [Salmonella enterica subsp. enterica serovar Typhimurium str. 14028S]
74	NC_016857	379701434	YP_005243162.1	PTS system fructose-specific transporter subunit IIBC [Salmonella enterica subsp. enterica serovar Typhimurium str. ST4/74]
74	NC_016860	378984766	YP_005247921.1	fructose-specific PTS system IIBC protein [Salmonella enterica subsp. enterica serovar Typhimurium str. T000240]
74	NC_016863	378989591	YP_005252755.1	PTS system fructose-specific transporter subunit IIBC [Salmonella enterica subsp. enterica serovar Typhimurium str. UK-1]
74	NC_017046	383496912	YP_005397601.1	PTS system fructose-specific transporter subunit IIBC [Salmonella enterica subsp. enterica serovar Typhimurium str. 798]
74	NC_017623	386592014	YP_006088414.1	PTS system fructose-specific transporter subunit IIB [Salmonella enterica subsp. enterica serovar Heidelberg str. B182]
74	NC_020307	452119591	YP_007469839.1	PTS system fructose-specific transporter subunits IIBC [Salmonella enterica subsp. enterica serovar Javiana str. CFSAN001992]
74	NC_021151	482904020	YP_007902580.1	PTS system fructose-specific transporter subunits IIBC [Salmonella enterica subsp. enterica serovar Typhimurium str. U288]
74	NC_021176	488653199	YP_007925002.1	fructose-specific PTS system IIBC component [Salmonella enterica subsp. enterica serovar Typhi str. Ty21a]
74	NC_021810	525818094	YP_008248112.1	PTS system fructose-specific transporter subunits IIBC [Salmonella enterica subsp. enterica serovar Heidelberg str. 41578]
74	NC_021812	525829731	YP_008252901.1	PTS fructose transporter subunit IIBC [Salmonella enterica subsp. enterica serovar Heidelberg str. CFSAN002069]
74	NC_021814	525837673	YP_008254541.1	PTS fructose transporter subunit IIBC [Salmonella enterica subsp. enterica serovar Typhimurium var. 5- str. CFSAN001921]
74	NC_021818	525858237	YP_008261498.1	PTS fructose transporter subunit IIBC [Salmonella enterica subsp. enterica serovar Cubana str. CFSAN002050]
74	NC_021820	526220780	YP_008266453.1	PTS fructose transporter subunit IIBC [Salmonella enterica subsp. enterica serovar 4,[5],12:i:- str. 08-1736]
74	NC_021844	525946792	YP_008308029.1	PTS fructose transporter subunit IIBC [Salmonella enterica subsp. enterica serovar Bareilly str. CFSAN000189]
74	NC_021902	528820030	YP_008361233.1	FruA protein [Salmonella enterica subsp. enterica serovar Newport str. USMARC-S3124.1]
74	NC_021984	529219256	YP_008380166.1	PTS fructose transporter subunit IIBC [Salmonella enterica subsp. enterica serovar Pullorum str. S06004]
74	NC_022221	537436004	YP_008480381.1	PTS system, fructose-specific IIBC component [Salmonella enterica subsp. enterica serovar Gallinarum/pullorum str. CDC1983-67]
74	NC_022241	538362829	YP_008506114.1	pts system fructose-specific eiibc component [Salmonella enterica subsp. enterica serovar Bovismorbificans str. 3114]
74	NC_022525	549479877	YP_008613988.1	PTS fructose transporter subunit IIBC [Salmonella enterica subsp. enterica serovar Thompson str. RM6836]
74	NC_022544	549724869	YP_008645059.1	PTS system, fructose-specific IIBC component [Salmonella enterica subsp. enterica serovar Typhimurium str. DT2]
74	NC_022569	550901642	YP_008670734.1	PTS system, fructose-specific IIBC component [Salmonella enterica subsp. enterica serovar Typhimurium str. DT104]
93	NC_003197	16766989	NP_462604.1	phosphoglyceromutase [Salmonella enterica subsp. enterica serovar Typhimurium str. LT2]
93	NC_003198	541470439	NP_458223.3	2,3-bisphosphoglycerate-independent phosphoglycerate mutase [Salmonella enterica subsp. enterica serovar Typhi str. CT18]
93	NC_004631	161486772	NP_807437.2	phosphoglyceromutase [Salmonella enterica subsp. enterica serovar Typhi str. Ty2]
93	NC_006511	459642608	YP_152669.3	2,3-bisphosphoglycerate-independent phosphoglycerate mutase [Salmonella enterica subsp. enterica serovar Paratyphi A str. ATCC 9150]
93	NC_006905	62182197	YP_218614.1	phosphoglyceromutase [Salmonella enterica subsp. enterica serovar Choleraesuis str. SC-B67]
93	NC_010067	161505761	YP_001572873.1	phosphoglyceromutase [Salmonella enterica subsp. arizonae serovar 62:z4,z23:- str. RSK2980]
93	NC_010102	161616782	YP_001590747.1	phosphoglyceromutase [Salmonella enterica subsp. enterica serovar Paratyphi B str. SPB7]
93	NC_011080	194446578	YP_002042954.1	phosphoglyceromutase [Salmonella enterica subsp. enterica serovar Newport str. SL254]
93	NC_011083	194450570	YP_002047735.1	phosphoglyceromutase [Salmonella enterica subsp. enterica serovar Heidelberg str. SL476]
93	NC_011094	194733987	YP_002116639.1	phosphoglyceromutase [Salmonella enterica subsp. enterica serovar Schwarzengrund str. CVM19633]
93	NC_011147	197364521	YP_002144158.1	phosphoglyceromutase [Salmonella enterica subsp. enterica serovar Paratyphi A str. AKU_12601]
93	NC_011149	197250579	YP_002148637.1	phosphoglyceromutase [Salmonella enterica subsp. enterica serovar Agona str. SL483]
93	NC_011205	198245019	YP_002217666.1	phosphoglyceromutase [Salmonella enterica subsp. enterica serovar Dublin str. CT_02021853]
93	NC_011274	205354693	YP_002228494.1	phosphoglyceromutase [Salmonella enterica subsp. enterica serovar Gallinarum str. 287/91]
93	NC_011294	207858941	YP_002245592.1	phosphoglyceromutase [Salmonella enterica subsp. enterica serovar Enteritidis str. P125109]
93	NC_012125	224585504	YP_002639303.1	phosphoglyceromutase [Salmonella enterica subsp. enterica serovar Paratyphi C strain RKS4594]
93	NC_016810	378701592	YP_005183550.1	2,3-bisphosphoglycerate-independent phosphoglycerate mutase [Salmonella enterica subsp. enterica serovar Typhimurium str. SL1344]
93	NC_016831	378957441	YP_005214928.1	2,3-bisphosphoglycerate-independent phosphoglycerate mutase [Salmonella enterica subsp. enterica serovar Gallinarum/pullorum str. RKS5078]
93	NC_016832	378961982	YP_005219468.1	2,3-bisphosphoglycerate-independent phosphoglycerate mutase [Salmonella enterica subsp. enterica serovar Typhi str. P-stx-12]
93	NC_016854	378447073	YP_005234705.1	2,3-bisphosphoglycerate-independent phosphoglycerate mutase [Salmonella enterica subsp. enterica serovar Typhimurium str. D23580]
93	NC_016856	378452584	YP_005239944.1	phosphoglyceromutase [Salmonella enterica subsp. enterica serovar Typhimurium str. 14028S]
93	NC_016857	379702965	YP_005244693.1	phosphoglyceromutase [Salmonella enterica subsp. enterica serovar Typhimurium str. ST4/74]
93	NC_016860	378986301	YP_005249457.1	phosphoglycerate mutase [Salmonella enterica subsp. enterica serovar Typhimurium str. T000240]
93	NC_016863	378991006	YP_005254170.1	phosphoglyceromutase [Salmonella enterica subsp. enterica serovar Typhimurium str. UK-1]
93	NC_017046	383498339	YP_005399028.1	2,3-bisphosphoglycerate-independent phosphoglycerate mutase [Salmonella enterica subsp. enterica serovar Typhimurium str. 798]
93	NC_017623	386593377	YP_006089777.1	2,3-bisphosphoglycerate-independent phosphoglycerate mutase [Salmonella enterica subsp. enterica serovar Heidelberg str. B182]
93	NC_020307	452122502	YP_007472750.1	phosphoglyceromutase [Salmonella enterica subsp. enterica serovar Javiana str. CFSAN001992]
93	NC_021151	482906268	YP_007904828.1	phosphoglyceromutase [Salmonella enterica subsp. enterica serovar Typhimurium str. U288]
93	NC_021176	488656254	YP_007928057.1	phosphoglyceromutase [Salmonella enterica subsp. enterica serovar Typhi str. Ty21a]
93	NC_021810	525814976	YP_008244994.1	phosphoglyceromutase [Salmonella enterica subsp. enterica serovar Heidelberg str. 41578]
93	NC_021812	525828589	YP_008251484.1	phosphoglyceromutase [Salmonella enterica subsp. enterica serovar Heidelberg str. CFSAN002069]
93	NC_021814	525840209	YP_008257682.1	phosphoglyceromutase [Salmonella enterica subsp. enterica serovar Typhimurium var. 5- str. CFSAN001921]
93	NC_021818	525859352	YP_008262948.1	phosphoglyceromutase [Salmonella enterica subsp. enterica serovar Cubana str. CFSAN002050]
93	NC_021820	526218402	YP_008263553.1	phosphoglyceromutase [Salmonella enterica subsp. enterica serovar 4,[5],12:i:- str. 08-1736]
93	NC_021844	525945675	YP_008306639.1	phosphoglyceromutase [Salmonella enterica subsp. enterica serovar Bareilly str. CFSAN000189]
93	NC_021902	528816892	YP_008358095.1	2,3-bisphosphoglycerate-independent phosphoglycerate mutase [Salmonella enterica subsp. enterica serovar Newport str. USMARC-S3124.1]
93	NC_021984	529221497	YP_008383031.1	phosphoglyceromutase [Salmonella enterica subsp. enterica serovar Pullorum str. S06004]
93	NC_022221	537439010	YP_008483387.1	2,3-bisphosphoglycerate-independent phosphoglycerate mutase [Salmonella enterica subsp. enterica serovar Gallinarum/pullorum str. CDC1983-67]
93	NC_022241	538364314	YP_008507599.1	phosphoglyceromutase [Salmonella enterica subsp. enterica serovar Bovismorbificans str. 3114]
93	NC_022525	549480987	YP_008615340.1	phosphoglyceromutase [Salmonella enterica subsp. enterica serovar Thompson str. RM6836]
93	NC_022544	549726256	YP_008646446.1	2,3-bisphosphoglycerate-independent phosphoglycerate mutase [Salmonella enterica subsp. enterica serovar Typhimurium str. DT2]
93	NC_022569	550903046	YP_008672138.1	2,3-bisphosphoglycerate-independent phosphoglycerate mutase [Salmonella enterica subsp. enterica serovar Typhimurium str. DT104]
98	NC_003197	16764922	NP_460537.1	nitrate reductase 2 beta subunit [Salmonella enterica subsp. enterica serovar Typhimurium str. LT2]
98	NC_003197	16765104	NP_460719.1	nitrate reductase 1 beta subunit [Salmonella enterica subsp. enterica serovar Typhimurium str. LT2]
98	NC_003198	16760123	NP_455740.1	respiratory nitrate reductase 1 beta chain [Salmonella enterica subsp. enterica serovar Typhi str. CT18]
98	NC_003198	16760301	NP_455918.1	respiratory nitrate reductase 2 beta chain [Salmonella enterica subsp. enterica serovar Typhi str. CT18]
98	NC_004631	29141934	NP_805276.1	respiratory nitrate reductase 2 subunit beta [Salmonella enterica subsp. enterica serovar Typhi str. Ty2]
98	NC_004631	29142106	NP_805448.1	respiratory nitrate reductase 1 subunit beta [Salmonella enterica subsp. enterica serovar Typhi str. Ty2]
98	NC_006511	56413315	YP_150390.1	respiratory nitrate reductase 1 subunit beta [Salmonella enterica subsp. enterica serovar Paratyphi A str. ATCC 9150]
98	NC_006511	56413475	YP_150550.1	respiratory nitrate reductase 2 subunit beta [Salmonella enterica subsp. enterica serovar Paratyphi A str. ATCC 9150]
98	NC_006905	62180147	YP_216564.1	nitrate reductase 2 subunit beta [Salmonella enterica subsp. enterica serovar Choleraesuis str. SC-B67]
98	NC_006905	62180327	YP_216744.1	nitrate reductase 1, FeS subunit beta [Salmonella enterica subsp. enterica serovar Choleraesuis str. SC-B67]
98	NC_010067	161503126	YP_001570238.1	hypothetical protein SARI_01191 [Salmonella enterica subsp. arizonae serovar 62:z4,z23:- str. RSK2980]
98	NC_010102	161613745	YP_001587710.1	hypothetical protein SPAB_01470 [Salmonella enterica subsp. enterica serovar Paratyphi B str. SPB7]
98	NC_010102	161613976	YP_001587941.1	hypothetical protein SPAB_01714 [Salmonella enterica subsp. enterica serovar Paratyphi B str. SPB7]
98	NC_011080	194445816	YP_002040825.1	nitrate reductase 2 subunit beta [Salmonella enterica subsp. enterica serovar Newport str. SL254]
98	NC_011080	194444066	YP_002041013.1	nitrate reductase 1 subunit beta [Salmonella enterica subsp. enterica serovar Newport str. SL254]
98	NC_011083	194450643	YP_002045618.1	nitrate reductase 2 subunit beta [Salmonella enterica subsp. enterica serovar Heidelberg str. SL476]
98	NC_011083	194450438	YP_002045806.1	nitrate reductase 1 subunit beta [Salmonella enterica subsp. enterica serovar Heidelberg str. SL476]
98	NC_011094	194736461	YP_002114602.1	nitrate reductase 2 subunit beta [Salmonella enterica subsp. enterica serovar Schwarzengrund str. CVM19633]
98	NC_011094	194737276	YP_002114792.1	nitrate reductase 1 subunit beta [Salmonella enterica subsp. enterica serovar Schwarzengrund str. CVM19633]
98	NC_011147	197362240	YP_002141877.1	respiratory nitrate reductase 1 subunit beta [Salmonella enterica subsp. enterica serovar Paratyphi A str. AKU_12601]
98	NC_011147	197362399	YP_002142036.1	respiratory nitrate reductase 2 subunit beta [Salmonella enterica subsp. enterica serovar Paratyphi A str. AKU_12601]
98	NC_011149	197249326	YP_002146267.1	nitrate reductase 1 subunit beta [Salmonella enterica subsp. enterica serovar Agona str. SL483]
98	NC_011149	197251245	YP_002146458.1	nitrate reductase 2 subunit beta [Salmonella enterica subsp. enterica serovar Agona str. SL483]
98	NC_011205	198243341	YP_002215382.1	nitrate reductase 1 subunit beta [Salmonella enterica subsp. enterica serovar Dublin str. CT_02021853]
98	NC_011205	198245547	YP_002215569.1	nitrate reductase 2 subunit beta [Salmonella enterica subsp. enterica serovar Dublin str. CT_02021853]
98	NC_011274	205352569	YP_002226370.1	respiratory nitrate reductase 1 subunit beta [Salmonella enterica subsp. enterica serovar Gallinarum str. 287/91]
98	NC_011274	205352736	YP_002226537.1	respiratory nitrate reductase 2 subunit beta [Salmonella enterica subsp. enterica serovar Gallinarum str. 287/91]
98	NC_011294	207856730	YP_002243381.1	respiratory nitrate reductase 1 subunit beta [Salmonella enterica subsp. enterica serovar Enteritidis str. P125109]
98	NC_011294	207856927	YP_002243578.1	respiratory nitrate reductase 2 subunit beta [Salmonella enterica subsp. enterica serovar Enteritidis str. P125109]
98	NC_012125	224583747	YP_002637545.1	respiratory nitrate reductase 1 subunit beta [Salmonella enterica subsp. enterica serovar Paratyphi C strain RKS4594]
98	NC_012125	224583930	YP_002637728.1	respiratory nitrate reductase 2 subunit beta [Salmonella enterica subsp. enterica serovar Paratyphi C strain RKS4594]
98	NC_016810	378699458	YP_005181415.1	respiratory nitrate reductase 2 subunit beta [Salmonella enterica subsp. enterica serovar Typhimurium str. SL1344]
98	NC_016810	378699639	YP_005181596.1	respiratory nitrate reductase 1 subunit beta [Salmonella enterica subsp. enterica serovar Typhimurium str. SL1344]
98	NC_016831	378955098	YP_005212585.1	respiratory nitrate reductase 2 subunit beta [Salmonella enterica subsp. enterica serovar Gallinarum/pullorum str. RKS5078]
98	NC_016831	378955270	YP_005212757.1	respiratory nitrate reductase 1 subunit beta [Salmonella enterica subsp. enterica serovar Gallinarum/pullorum str. RKS5078]
98	NC_016832	378959648	YP_005217134.1	Respiratory nitrate reductase 2 beta chain [Salmonella enterica subsp. enterica serovar Typhi str. P-stx-12]
98	NC_016832	378959838	YP_005217324.1	Respiratory nitrate reductase 2 beta chain [Salmonella enterica subsp. enterica serovar Typhi str. P-stx-12]
98	NC_016854	378444992	YP_005232624.1	respiratory nitrate reductase 2 subunit beta [Salmonella enterica subsp. enterica serovar Typhimurium str. D23580]
98	NC_016854	378445170	YP_005232802.1	respiratory nitrate reductase 1 subunit beta [Salmonella enterica subsp. enterica serovar Typhimurium str. D23580]
98	NC_016856	378450114	YP_005237473.1	nitrate reductase 2 beta subunit [Salmonella enterica subsp. enterica serovar Typhimurium str. 14028S]
98	NC_016856	378450331	YP_005237690.1	nitrate reductase 1 subunit beta [Salmonella enterica subsp. enterica serovar Typhimurium str. 14028S]
98	NC_016857	379700749	YP_005242477.1	nitrate reductase 2 beta subunit [Salmonella enterica subsp. enterica serovar Typhimurium str. ST4/74]
98	NC_016857	379700934	YP_005242662.1	nitrate reductase 1 subunit beta [Salmonella enterica subsp. enterica serovar Typhimurium str. ST4/74]
98	NC_016860	378984138	YP_005247293.1	hypothetical protein STMDT12_C15970 [Salmonella enterica subsp. enterica serovar Typhimurium str. T000240]
98	NC_016860	378984324	YP_005247479.1	nitrate reductase 1 subunit beta [Salmonella enterica subsp. enterica serovar Typhimurium str. T000240]
98	NC_016863	378988918	YP_005252082.1	nitrate reductase 2 beta subunit [Salmonella enterica subsp. enterica serovar Typhimurium str. UK-1]
98	NC_016863	378989103	YP_005252267.1	nitrate reductase 1 subunit beta [Salmonella enterica subsp. enterica serovar Typhimurium str. UK-1]
98	NC_017046	383496279	YP_005396968.1	respiratory nitrate reductase 2 subunit beta [Salmonella enterica subsp. enterica serovar Typhimurium str. 798]
98	NC_017046	383496454	YP_005397143.1	respiratory nitrate reductase 1 subunit beta [Salmonella enterica subsp. enterica serovar Typhimurium str. 798]
98	NC_017623	386591597	YP_006087997.1	respiratory nitrate reductase subunit beta [Salmonella enterica subsp. enterica serovar Heidelberg str. B182]
98	NC_020307	452120047	YP_007470295.1	nitrate reductase A subunit beta [Salmonella enterica subsp. enterica serovar Javiana str. CFSAN001992]
98	NC_020307	452120243	YP_007470491.1	nitrate reductase Z subunit beta [Salmonella enterica subsp. enterica serovar Javiana str. CFSAN001992]
98	NC_021151	482903389	YP_007901949.1	nitrate reductase Z subunit beta [Salmonella enterica subsp. enterica serovar Typhimurium str. U288]
98	NC_021151	482903575	YP_007902135.1	nitrate reductase A subunit beta [Salmonella enterica subsp. enterica serovar Typhimurium str. U288]
98	NC_021176	488654004	YP_007925807.1	respiratory nitrate reductase 2 beta chain [Salmonella enterica subsp. enterica serovar Typhi str. Ty21a]
98	NC_021176	488654187	YP_007925990.1	nitrate reductase 1, beta subunit [Salmonella enterica subsp. enterica serovar Typhi str. Ty21a]
98	NC_021810	525817464	YP_008247482.1	nitrate reductase Z subunit beta [Salmonella enterica subsp. enterica serovar Heidelberg str. 41578]
98	NC_021810	525817649	YP_008247667.1	nitrate reductase A subunit beta [Salmonella enterica subsp. enterica serovar Heidelberg str. 41578]
98	NC_021812	525826651	YP_008249077.1	nitrate reductase A subunit beta [Salmonella enterica subsp. enterica serovar Heidelberg str. CFSAN002069]
98	NC_021812	525826500	YP_008248892.1	nitrate reductase A subunit beta [Salmonella enterica subsp. enterica serovar Heidelberg str. CFSAN002069]
98	NC_021814	525838086	YP_008255034.1	nitrate reductase A subunit beta [Salmonella enterica subsp. enterica serovar Typhimurium var. 5- str. CFSAN001921]
98	NC_021814	525838235	YP_008255219.1	nitrate reductase A subunit beta [Salmonella enterica subsp. enterica serovar Typhimurium var. 5- str. CFSAN001921]
98	NC_021818	525857661	YP_008260767.1	nitrate reductase A subunit beta [Salmonella enterica subsp. enterica serovar Cubana str. CFSAN002050]
98	NC_021818	525857817	YP_008260963.1	nitrate reductase A subunit beta [Salmonella enterica subsp. enterica serovar Cubana str. CFSAN002050]
98	NC_021820	526220220	YP_008265783.1	nitrate reductase A subunit beta [Salmonella enterica subsp. enterica serovar 4,[5],12:i:- str. 08-1736]
98	NC_021820	526220369	YP_008265971.1	nitrate reductase A subunit beta [Salmonella enterica subsp. enterica serovar 4,[5],12:i:- str. 08-1736]
98	NC_021844	525947148	YP_008308457.1	nitrate reductase A subunit beta [Salmonella enterica subsp. enterica serovar Bareilly str. CFSAN000189]
98	NC_021844	525947298	YP_008308642.1	nitrate reductase A subunit beta [Salmonella enterica subsp. enterica serovar Bareilly str. CFSAN000189]
98	NC_021902	528819366	YP_008360569.1	reductase [Salmonella enterica subsp. enterica serovar Newport str. USMARC-S3124.1]
98	NC_021902	528819557	YP_008360760.1	reductase [Salmonella enterica subsp. enterica serovar Newport str. USMARC-S3124.1]
98	NC_021984	529219837	YP_008380912.1	nitrate reductase A subunit beta [Salmonella enterica subsp. enterica serovar Pullorum str. S06004]
98	NC_022221	537436672	YP_008481049.1	respiratory nitrate reductase 2 beta chain [Salmonella enterica subsp. enterica serovar Gallinarum/pullorum str. CDC1983-67]
98	NC_022221	537436846	YP_008481223.1	respiratory nitrate reductase 1 beta chain [Salmonella enterica subsp. enterica serovar Gallinarum/pullorum str. CDC1983-67]
98	NC_022241	538362163	YP_008505448.1	respiratory nitrate reductase 2 beta chain [Salmonella enterica subsp. enterica serovar Bovismorbificans str. 3114]
98	NC_022241	538362353	YP_008505638.1	nitrate reductase 1, FeS (beta) subunit [Salmonella enterica subsp. enterica serovar Bovismorbificans str. 3114]
98	NC_022525	549479370	YP_008613362.1	nitrate reductase A subunit beta [Salmonella enterica subsp. enterica serovar Thompson str. RM6836]
98	NC_022525	549479520	YP_008613546.1	nitrate reductase A subunit beta [Salmonella enterica subsp. enterica serovar Thompson str. RM6836]
98	NC_022544	549724203	YP_008644393.1	respiratory nitrate reductase 2 beta chain [Salmonella enterica subsp. enterica serovar Typhimurium str. DT2]
98	NC_022544	549724385	YP_008644575.1	respiratory nitrate reductase 1 beta chain [Salmonella enterica subsp. enterica serovar Typhimurium str. DT2]
98	NC_022569	550900938	YP_008670030.1	respiratory nitrate reductase 2 beta chain [Salmonella enterica subsp. enterica serovar Typhimurium str. DT104]
98	NC_022569	550901118	YP_008670210.1	respiratory nitrate reductase 1 beta chain [Salmonella enterica subsp. enterica serovar Typhimurium str. DT104]
113	NC_003197	16763513	NP_459128.1	UDP-N-acetylmuramoylalanyl-D-glutamate--2,6-diaminopimelate ligase [Salmonella enterica subsp. enterica serovar Typhimurium str. LT2]
113	NC_003198	16759118	NP_454735.1	UDP-N-acetylmuramoylalanyl-D-glutamate--2,6-dia minopim ligase [Salmonella enterica subsp. enterica serovar Typhi str. CT18]
113	NC_004631	29140668	NP_804010.1	UDP-N-acetylmuramoylalanyl-D-glutamate--2,6-diaminopimelate ligase [Salmonella enterica subsp. enterica serovar Typhi str. Ty2]
113	NC_006511	56412395	YP_149470.1	UDP-N-acetylmuramoylalanyl-D-glutamate--2,6-dia minopim ligase [Salmonella enterica subsp. enterica serovar Paratyphi A str. ATCC 9150]
113	NC_006905	62178690	YP_215107.1	UDP-N-acetylmuramoylalanyl-D-glutamate--2,6-diaminopimelate ligase [Salmonella enterica subsp. enterica serovar Choleraesuis str. SC-B67]
113	NC_010067	161504755	YP_001571867.1	UDP-N-acetylmuramoylalanyl-D-glutamate--2,6-diaminopimelate ligase [Salmonella enterica subsp. arizonae serovar 62:z4,z23:- str. RSK2980]
113	NC_010102	161612467	YP_001586432.1	UDP-N-acetylmuramoylalanyl-D-glutamate--2,6-diaminopimelate ligase [Salmonella enterica subsp. enterica serovar Paratyphi B str. SPB7]
113	NC_011080	194443335	YP_002039355.1	UDP-N-acetylmuramoylalanyl-D-glutamate--2,6-diaminopimelate ligase [Salmonella enterica subsp. enterica serovar Newport str. SL254]
113	NC_011083	194449143	YP_002044093.1	UDP-N-acetylmuramoylalanyl-D-glutamate--2,6-diaminopimelate ligase [Salmonella enterica subsp. enterica serovar Heidelberg str. SL476]
113	NC_011094	194737109	YP_002113141.1	UDP-N-acetylmuramoylalanyl-D-glutamate--2,6-diaminopimelate ligase [Salmonella enterica subsp. enterica serovar Schwarzengrund str. CVM19633]
113	NC_011147	197361331	YP_002140966.1	UDP-N-acetylmuramoylalanyl-D-glutamate--2,6-diaminopimelate ligase [Salmonella enterica subsp. enterica serovar Paratyphi A str. AKU_12601]
113	NC_011149	197251914	YP_002145109.1	UDP-N-acetylmuramoylalanyl-D-glutamate--2,6-diaminopimelate ligase [Salmonella enterica subsp. enterica serovar Agona str. SL483]
113	NC_011205	198245705	YP_002214075.1	UDP-N-acetylmuramoylalanyl-D-glutamate--2,6-diaminopimelate ligase [Salmonella enterica subsp. enterica serovar Dublin str. CT_02021853]
113	NC_011274	205351462	YP_002225263.1	UDP-N-acetylmuramoylalanyl-D-glutamate--2,6-diaminopimelate ligase [Salmonella enterica subsp. enterica serovar Gallinarum str. 287/91]
113	NC_011294	207855637	YP_002242288.1	UDP-N-acetylmuramoylalanyl-D-glutamate--2,6-diaminopimelate ligase [Salmonella enterica subsp. enterica serovar Enteritidis str. P125109]
113	NC_012125	224581966	YP_002635764.1	UDP-N-acetylmuramoylalanyl-D-glutamate--2,6-diaminopimelate ligase [Salmonella enterica subsp. enterica serovar Paratyphi C strain RKS4594]
113	NC_016810	378698103	YP_005180060.1	UDP-N-acetylmuramoylalanyl-D-glutamate--2, 6-diaminopimelate ligase [Salmonella enterica subsp. enterica serovar Typhimurium str. SL1344]
113	NC_016831	378953927	YP_005211414.1	UDP-N-acetylmuramoylalanyl-D-glutamate--2,6-dia minopim ligase [Salmonella enterica subsp. enterica serovar Gallinarum/pullorum str. RKS5078]
113	NC_016832	378958270	YP_005215756.1	UDP-N-acetylmuramoyl-L-alanyl-D-glutamate--2,6- diaminopimelate ligase [Salmonella enterica subsp. enterica serovar Typhi str. P-stx-12]
113	NC_016854	378443577	YP_005231209.1	Meso-diaminopimelate-adding enzyme [Salmonella enterica subsp. enterica serovar Typhimurium str. D23580]
113	NC_016856	378448423	YP_005235782.1	UDP-N-acetylmuramoylalanyl-D-glutamate--2, 6-diaminopimelate ligase [Salmonella enterica subsp. enterica serovar Typhimurium str. 14028S]
113	NC_016857	379699344	YP_005241072.1	UDP-N-acetylmuramoylalanyl-D-glutamate--2, 6-diaminopimelate ligase [Salmonella enterica subsp. enterica serovar Typhimurium str. ST4/74]
113	NC_016860	378982664	YP_005245819.1	UDP-N-acetylmuramoylalanyl-D-glutamate--2, 6-diaminopimelate ligase [Salmonella enterica subsp. enterica serovar Typhimurium str. T000240]
113	NC_016863	378987529	YP_005250693.1	UDP-N-acetylmuramoylalanyl-D-glutamate--2, 6-diaminopimelate ligase [Salmonella enterica subsp. enterica serovar Typhimurium str. UK-1]
113	NC_017046	383494945	YP_005395634.1	UDP-N-acetylmuramoylalanyl-D-glutamate--2, 6-diaminopimelate ligase [Salmonella enterica subsp. enterica serovar Typhimurium str. 798]
113	NC_017623	386590002	YP_006086402.1	UDP-N-acetylmuramoylalanyl-D-glutamate--2,6-diaminopimelate ligase [Salmonella enterica subsp. enterica serovar Heidelberg str. B182]
113	NC_020307	452121572	YP_007471820.1	UDP-N-acetylmuramoylalanyl-D-glutamate--2,6-diaminopimelate ligase [Salmonella enterica subsp. enterica serovar Javiana str. CFSAN001992]
113	NC_021151	482902672	YP_007901232.1	UDP-N-acetylmuramoylalanyl-D-glutamate--2,6-diaminopimelate ligase [Salmonella enterica subsp. enterica serovar Typhimurium str. U288]
113	NC_021176	488652688	YP_007924491.1	UDP-N-acetylmuramoylalanyl-D-glutamate--2,6-diaminopimelate ligase [Salmonella enterica subsp. enterica serovar Typhi str. Ty21a]
113	NC_021810	525815980	YP_008245998.1	UDP-N-acetylmuramoylalanyl-D-glutamate--2,6-diaminopimelate ligase [Salmonella enterica subsp. enterica serovar Heidelberg str. 41578]
113	NC_021812	525827829	YP_008250549.1	UDP-N-acetylmuramoylalanyl-D-glutamate--2,6-diaminopimelate ligase [Salmonella enterica subsp. enterica serovar Heidelberg str. CFSAN002069]
113	NC_021814	525839410	YP_008256700.1	UDP-N-acetylmuramoylalanyl-D-glutamate--2,6-diaminopimelate ligase [Salmonella enterica subsp. enterica serovar Typhimurium var. 5- str. CFSAN001921]
113	NC_021818	525856543	YP_008259355.1	UDP-N-acetylmuramoylalanyl-D-glutamate--2,6-diaminopimelate ligase [Salmonella enterica subsp. enterica serovar Cubana str. CFSAN002050]
113	NC_021820	526219076	YP_008264382.1	UDP-N-acetylmuramoylalanyl-D-glutamate--2,6-diaminopimelate ligase [Salmonella enterica subsp. enterica serovar 4,[5],12:i:- str. 08-1736]
113	NC_021844	525948414	YP_008310038.1	UDP-N-acetylmuramoylalanyl-D-glutamate--2,6-diaminopimelate ligase [Salmonella enterica subsp. enterica serovar Bareilly str. CFSAN000189]
113	NC_021902	528817822	YP_008359025.1	UDP-N-acetylmuramoyl-L-alanyl-D-glutamate--2,6- diaminopimelate ligase [Salmonella enterica subsp. enterica serovar Newport str. USMARC-S3124.1]
113	NC_021984	529218874	YP_008379711.1	UDP-N-acetylmuramoylalanyl-D-glutamate--2,6-diaminopimelate ligase [Salmonella enterica subsp. enterica serovar Pullorum str. S06004]
113	NC_022221	537435493	YP_008479870.1	UDP-N-acetylmuramoylalanyl-D-glutamate--2,6-dia minopim ligase [Salmonella enterica subsp. enterica serovar Gallinarum/pullorum str. CDC1983-67]
113	NC_022241	538360694	YP_008503979.1	hypothetical protein BN855_1290 [Salmonella enterica subsp. enterica serovar Bovismorbificans str. 3114]
113	NC_022525	549478237	YP_008611956.1	UDP-N-acetylmuramoylalanyl-D-glutamate--2,6-diaminopimelate ligase [Salmonella enterica subsp. enterica serovar Thompson str. RM6836]
113	NC_022544	549722848	YP_008643038.1	UDP-N-acetylmuramoylalanyl-D-glutamate--2,6-dia minopimelate ligase [Salmonella enterica subsp. enterica serovar Typhimurium str. DT2]
113	NC_022569	550899548	YP_008668640.1	UDP-N-acetylmuramoylalanyl-D-glutamate--2,6-dia minopimelate ligase [Salmonella enterica subsp. enterica serovar Typhimurium str. DT104]
119	NC_003197	16764558	NP_460173.1	PTS system glucose-specific transporter subunit IIBC [Salmonella enterica subsp. enterica serovar Typhimurium str. LT2]
119	NC_003198	16760079	NP_455696.1	PTS system, glucose-specific IIBC component [Salmonella enterica subsp. enterica serovar Typhi str. CT18]
119	NC_004631	29142150	NP_805492.1	PTS system glucose-specific transporter subunits IIBC [Salmonella enterica subsp. enterica serovar Typhi str. Ty2]
119	NC_006511	56413811	YP_150886.1	PTS system glucose-specific transporter subunit IIBC [Salmonella enterica subsp. enterica serovar Paratyphi A str. ATCC 9150]
119	NC_006905	62179723	YP_216140.1	PTS system glucose-specific transporter subunit IIBC [Salmonella enterica subsp. enterica serovar Choleraesuis str. SC-B67]
119	NC_010067	161503704	YP_001570816.1	PTS system glucose-specific transporter subunits IIBC [Salmonella enterica subsp. arizonae serovar 62:z4,z23:- str. RSK2980]
119	NC_010102	161614570	YP_001588535.1	PTS system glucose-specific transporter subunits IIBC [Salmonella enterica subsp. enterica serovar Paratyphi B str. SPB7]
119	NC_011080	194443206	YP_002040457.1	PTS system glucose-specific transporter subunit IIBC [Salmonella enterica subsp. enterica serovar Newport str. SL254]
119	NC_011083	194450871	YP_002045202.1	PTS system glucose-specific transporter subunit IIBC [Salmonella enterica subsp. enterica serovar Heidelberg str. SL476]
119	NC_011094	194735242	YP_002114208.1	PTS system glucose-specific transporter subunit IIBC [Salmonella enterica subsp. enterica serovar Schwarzengrund str. CVM19633]
119	NC_011147	197362734	YP_002142371.1	PTS system glucose-specific transporter subunit IIBC [Salmonella enterica subsp. enterica serovar Paratyphi A str. AKU_12601]
119	NC_011149	197249202	YP_002146839.1	PTS system glucose-specific transporter subunit IIBC [Salmonella enterica subsp. enterica serovar Agona str. SL483]
119	NC_011205	198244688	YP_002215935.1	PTS system glucose-specific transporter subunits IIBC [Salmonella enterica subsp. enterica serovar Dublin str. CT_02021853]
119	NC_011274	205353062	YP_002226863.1	PTS system glucose-specific transporter subunits IIBC [Salmonella enterica subsp. enterica serovar Gallinarum str. 287/91]
119	NC_011294	207857290	YP_002243941.1	PTS system glucose-specific transporter subunit IIBC [Salmonella enterica subsp. enterica serovar Enteritidis str. P125109]
119	NC_012125	224584290	YP_002638088.1	PTS system glucose-specific transporter subunits IIBC [Salmonella enterica subsp. enterica serovar Paratyphi C strain RKS4594]
119	NC_016810	378699096	YP_005181053.1	PTS system glucose-specific transporter subunit IIBC [Salmonella enterica subsp. enterica serovar Typhimurium str. SL1344]
119	NC_016831	378954743	YP_005212230.1	PTS system glucose-specific transporter subunit IIBC [Salmonella enterica subsp. enterica serovar Gallinarum/pullorum str. RKS5078]
119	NC_016832	378959884	YP_005217370.1	Glucose-specific phosphotransferase enzyme IIB component [Salmonella enterica subsp. enterica serovar Typhi str. P-stx-12]
119	NC_016854	378444636	YP_005232268.1	PTS system glucose-specific transporter subunit IIBC [Salmonella enterica subsp. enterica serovar Typhimurium str. D23580]
119	NC_016856	378449601	YP_005236960.1	glucose-specific PTS system IIBC components [Salmonella enterica subsp. enterica serovar Typhimurium str. 14028S]
119	NC_016857	379700373	YP_005242101.1	PTS system glucose-specific EIICB component [Salmonella enterica subsp. enterica serovar Typhimurium str. ST4/74]
119	NC_016860	378983763	YP_005246918.1	glucose-specific PTS system IIBC protein [Salmonella enterica subsp. enterica serovar Typhimurium str. T000240]
119	NC_016863	378988547	YP_005251711.1	PTS system glucose-specific transporter subunit IIBC [Salmonella enterica subsp. enterica serovar Typhimurium str. UK-1]
119	NC_017046	383495925	YP_005396614.1	PTS system glucose-specific transporter subunit IIBC [Salmonella enterica subsp. enterica serovar Typhimurium str. 798]
119	NC_017623	386591065	YP_006087465.1	PTS system, glucose-specific IIB component [Salmonella enterica subsp. enterica serovar Heidelberg str. B182]
119	NC_020307	452120629	YP_007470877.1	PTS glucose-specific subunit IIBC [Salmonella enterica subsp. enterica serovar Javiana str. CFSAN001992]
119	NC_021151	482903014	YP_007901574.1	PTS glucose-specific subunit IIBC [Salmonella enterica subsp. enterica serovar Typhimurium str. U288]
119	NC_021176	488654231	YP_007926034.1	glucose-specific PTS system IIBC components [Salmonella enterica subsp. enterica serovar Typhi str. Ty21a]
119	NC_021810	525817091	YP_008247109.1	PTS glucose-specific subunit IIBC [Salmonella enterica subsp. enterica serovar Heidelberg str. 41578]
119	NC_021812	525826955	YP_008249459.1	PTS glucose transporter subunit IIBC [Salmonella enterica subsp. enterica serovar Heidelberg str. CFSAN002069]
119	NC_021814	525838534	YP_008255603.1	PTS glucose transporter subunit IIBC [Salmonella enterica subsp. enterica serovar Typhimurium var. 5- str. CFSAN001921]
119	NC_021818	525857361	YP_008260394.1	PTS glucose transporter subunit IIBC [Salmonella enterica subsp. enterica serovar Cubana str. CFSAN002050]
119	NC_021820	526219920	YP_008265401.1	PTS glucose transporter subunit IIBC [Salmonella enterica subsp. enterica serovar 4,[5],12:i:- str. 08-1736]
119	NC_021844	525947600	YP_008309024.1	PTS glucose transporter subunit IIBC [Salmonella enterica subsp. enterica serovar Bareilly str. CFSAN000189]
119	NC_021902	528818985	YP_008360188.1	PTS system glucose-specific EIICB component [Salmonella enterica subsp. enterica serovar Newport str. USMARC-S3124.1]
119	NC_021984	529219469	YP_008380444.1	PTS glucose transporter subunit IIBC [Salmonella enterica subsp. enterica serovar Pullorum str. S06004]
119	NC_022221	537436313	YP_008480690.1	PTS system, glucose-specific IIBC component [Salmonella enterica subsp. enterica serovar Gallinarum/pullorum str. CDC1983-67]
119	NC_022241	538361709	YP_008504994.1	hypothetical protein BN855_11640 [Salmonella enterica subsp. enterica serovar Bovismorbificans str. 3114]
119	NC_022525	549479070	YP_008612990.1	PTS glucose transporter subunit IIBC [Salmonella enterica subsp. enterica serovar Thompson str. RM6836]
119	NC_022544	549723843	YP_008644033.1	PTS system, glucose-specific IIBC component [Salmonella enterica subsp. enterica serovar Typhimurium str. DT2]
119	NC_022569	550900580	YP_008669672.1	PTS system, glucose-specific IIBC component [Salmonella enterica subsp. enterica serovar Typhimurium str. DT104]
121	NC_003197	16763519	NP_459134.1	UDP-N-acetylmuramate--L-alanine ligase [Salmonella enterica subsp. enterica serovar Typhimurium str. LT2]
121	NC_003198	16759124	NP_454741.1	UDP-N-acetylmuramate:alanine ligase [Salmonella enterica subsp. enterica serovar Typhi str. CT18]
121	NC_004631	29140674	NP_804016.1	UDP-N-acetylmuramate--L-alanine ligase [Salmonella enterica subsp. enterica serovar Typhi str. Ty2]
121	NC_006511	56412401	YP_149476.1	UDP-N-acetylmuramate:alanine ligase [Salmonella enterica subsp. enterica serovar Paratyphi A str. ATCC 9150]
121	NC_006905	62178696	YP_215113.1	UDP-N-acetylmuramate--L-alanine ligase [Salmonella enterica subsp. enterica serovar Choleraesuis str. SC-B67]
121	NC_010067	161504749	YP_001571861.1	UDP-N-acetylmuramate--L-alanine ligase [Salmonella enterica subsp. arizonae serovar 62:z4,z23:- str. RSK2980]
121	NC_010102	161612473	YP_001586438.1	UDP-N-acetylmuramate--L-alanine ligase [Salmonella enterica subsp. enterica serovar Paratyphi B str. SPB7]
121	NC_011080	194445444	YP_002039361.1	UDP-N-acetylmuramate--L-alanine ligase [Salmonella enterica subsp. enterica serovar Newport str. SL254]
121	NC_011083	194450712	YP_002044099.1	UDP-N-acetylmuramate--L-alanine ligase [Salmonella enterica subsp. enterica serovar Heidelberg str. SL476]
121	NC_011094	194734645	YP_002113147.1	UDP-N-acetylmuramate--L-alanine ligase [Salmonella enterica subsp. enterica serovar Schwarzengrund str. CVM19633]
121	NC_011147	197361337	YP_002140972.1	UDP-N-acetylmuramate--L-alanine ligase [Salmonella enterica subsp. enterica serovar Paratyphi A str. AKU_12601]
121	NC_011149	197247646	YP_002145115.1	UDP-N-acetylmuramate--L-alanine ligase [Salmonella enterica subsp. enterica serovar Agona str. SL483]
121	NC_011205	198242404	YP_002214081.1	UDP-N-acetylmuramate--L-alanine ligase [Salmonella enterica subsp. enterica serovar Dublin str. CT_02021853]
121	NC_011274	205351468	YP_002225269.1	UDP-N-acetylmuramate--L-alanine ligase [Salmonella enterica subsp. enterica serovar Gallinarum str. 287/91]
121	NC_011294	207855643	YP_002242294.1	UDP-N-acetylmuramate--L-alanine ligase [Salmonella enterica subsp. enterica serovar Enteritidis str. P125109]
121	NC_012125	224581972	YP_002635770.1	UDP-N-acetylmuramate--L-alanine ligase [Salmonella enterica subsp. enterica serovar Paratyphi C strain RKS4594]
121	NC_016810	378698109	YP_005180066.1	UDP-N-acetylmuramate--L-alanine ligase [Salmonella enterica subsp. enterica serovar Typhimurium str. SL1344]
121	NC_016831	378953933	YP_005211420.1	UDP-N-acetylmuramate:alanine ligase [Salmonella enterica subsp. enterica serovar Gallinarum/pullorum str. RKS5078]
121	NC_016832	378958276	YP_005215762.1	UDP-N-acetylmuramate--L-alanine ligase [Salmonella enterica subsp. enterica serovar Typhi str. P-stx-12]
121	NC_016854	378443583	YP_005231215.1	UDP-N-acetylmuramate--L-alanine ligase [Salmonella enterica subsp. enterica serovar Typhimurium str. D23580]
121	NC_016856	378448429	YP_005235788.1	UDP-N-acetylmuramate--L-alanine ligase [Salmonella enterica subsp. enterica serovar Typhimurium str. 14028S]
121	NC_016857	379699350	YP_005241078.1	UDP-N-acetylmuramate--L-alanine ligase [Salmonella enterica subsp. enterica serovar Typhimurium str. ST4/74]
121	NC_016860	378982670	YP_005245825.1	UDP-N-acetylmuramate--L-alanine ligase [Salmonella enterica subsp. enterica serovar Typhimurium str. T000240]
121	NC_016863	378987535	YP_005250699.1	UDP-N-acetylmuramate--L-alanine ligase [Salmonella enterica subsp. enterica serovar Typhimurium str. UK-1]
121	NC_017046	383494951	YP_005395640.1	UDP-N-acetylmuramate--L-alanine ligase [Salmonella enterica subsp. enterica serovar Typhimurium str. 798]
121	NC_017623	386590008	YP_006086408.1	UDP-N-acetylmuramate--L-alanine ligase [Salmonella enterica subsp. enterica serovar Heidelberg str. B182]
121	NC_020307	452121566	YP_007471814.1	UDP-N-acetylmuramate--L-alanine ligase [Salmonella enterica subsp. enterica serovar Javiana str. CFSAN001992]
121	NC_021151	482902678	YP_007901238.1	UDP-N-acetylmuramate--L-alanine ligase [Salmonella enterica subsp. enterica serovar Typhimurium str. U288]
121	NC_021176	488652694	YP_007924497.1	UDP-N-acetylmuramate--L-alanine ligase [Salmonella enterica subsp. enterica serovar Typhi str. Ty21a]
121	NC_021810	525815986	YP_008246004.1	UDP-N-acetylmuramate--L-alanine ligase [Salmonella enterica subsp. enterica serovar Heidelberg str. 41578]
121	NC_021812	525827824	YP_008250543.1	UDP-N-acetylmuramate--alanine ligase [Salmonella enterica subsp. enterica serovar Heidelberg str. CFSAN002069]
121	NC_021814	525839405	YP_008256694.1	UDP-N-acetylmuramate--alanine ligase [Salmonella enterica subsp. enterica serovar Typhimurium var. 5- str. CFSAN001921]
121	NC_021818	525856548	YP_008259361.1	UDP-N-acetylmuramate--alanine ligase [Salmonella enterica subsp. enterica serovar Cubana str. CFSAN002050]
121	NC_021820	526219081	YP_008264388.1	UDP-N-acetylmuramate--alanine ligase [Salmonella enterica subsp. enterica serovar 4,[5],12:i:- str. 08-1736]
121	NC_021844	525948409	YP_008310032.1	UDP-N-acetylmuramate--alanine ligase [Salmonella enterica subsp. enterica serovar Bareilly str. CFSAN000189]
121	NC_021902	528817828	YP_008359031.1	UDP-N-acetylmuramate--L-alanine ligase [Salmonella enterica subsp. enterica serovar Newport str. USMARC-S3124.1]
121	NC_021984	529218877	YP_008379715.1	UDP-N-acetylmuramate--alanine ligase [Salmonella enterica subsp. enterica serovar Pullorum str. S06004]
121	NC_022221	537435499	YP_008479876.1	UDP-N-acetylmuramate:alanine ligase [Salmonella enterica subsp. enterica serovar Gallinarum/pullorum str. CDC1983-67]
121	NC_022241	538360700	YP_008503985.1	UDP-N-acetylmuramate--alanine ligase [Salmonella enterica subsp. enterica serovar Bovismorbificans str. 3114]
121	NC_022525	549478242	YP_008611962.1	UDP-N-acetylmuramate--alanine ligase [Salmonella enterica subsp. enterica serovar Thompson str. RM6836]
121	NC_022544	549722854	YP_008643044.1	UDP-N-acetylmuramate--L-alanine ligase [Salmonella enterica subsp. enterica serovar Typhimurium str. DT2]
121	NC_022569	550899554	YP_008668646.1	UDP-N-acetylmuramate--L-alanine ligase [Salmonella enterica subsp. enterica serovar Typhimurium str. DT104]
123	NC_003197	16764585	NP_460200.1	sensor protein PhoQ [Salmonella enterica subsp. enterica serovar Typhimurium str. LT2]
123	NC_003198	16760105	NP_455722.1	sensor protein PhoQ, regulator of virulence determinants [Salmonella enterica subsp. enterica serovar Typhi str. CT18]
123	NC_004631	29142124	NP_805466.1	sensor protein PhoQ [Salmonella enterica subsp. enterica serovar Typhi str. Ty2]
123	NC_006511	56413784	YP_150859.1	sensor protein PhoQ, regulator of virulence determinants [Salmonella enterica subsp. enterica serovar Paratyphi A str. ATCC 9150]
123	NC_006905	62179751	YP_216168.1	sensor protein PhoQ [Salmonella enterica subsp. enterica serovar Choleraesuis str. SC-B67]
123	NC_010067	161503676	YP_001570788.1	sensor protein PhoQ [Salmonella enterica subsp. arizonae serovar 62:z4,z23:- str. RSK2980]
123	NC_010102	161614535	YP_001588500.1	sensor protein PhoQ [Salmonella enterica subsp. enterica serovar Paratyphi B str. SPB7]
123	NC_011080	194444857	YP_002040486.1	sensor protein PhoQ [Salmonella enterica subsp. enterica serovar Newport str. SL254]
123	NC_011083	194449089	YP_002045232.1	sensor protein PhoQ [Salmonella enterica subsp. enterica serovar Heidelberg str. SL476]
123	NC_011094	194735519	YP_002114237.1	sensor protein PhoQ [Salmonella enterica subsp. enterica serovar Schwarzengrund str. CVM19633]
123	NC_011147	197362707	YP_002142344.1	sensor protein PhoQ [Salmonella enterica subsp. enterica serovar Paratyphi A str. AKU_12601]
123	NC_011149	197248978	YP_002146811.1	sensor protein PhoQ [Salmonella enterica subsp. enterica serovar Agona str. SL483]
123	NC_011205	198245737	YP_002215905.1	sensor protein PhoQ [Salmonella enterica subsp. enterica serovar Dublin str. CT_02021853]
123	NC_011274	205353036	YP_002226837.1	sensor protein PhoQ [Salmonella enterica subsp. enterica serovar Gallinarum str. 287/91]
123	NC_011294	207857263	YP_002243914.1	sensor protein PhoQ [Salmonella enterica subsp. enterica serovar Enteritidis str. P125109]
123	NC_012125	224584262	YP_002638060.1	sensor protein PhoQ [Salmonella enterica subsp. enterica serovar Paratyphi C strain RKS4594]
123	NC_016810	378699123	YP_005181080.1	sensor protein PhoQ, regulator of virulence determinants [Salmonella enterica subsp. enterica serovar Typhimurium str. SL1344]
123	NC_016831	378954771	YP_005212258.1	sensor protein PhoQ, regulator of virulence determinants [Salmonella enterica subsp. enterica serovar Gallinarum/pullorum str. RKS5078]
123	NC_016832	378959856	YP_005217342.1	Virulence sensor histidine kinase phoQ [Salmonella enterica subsp. enterica serovar Typhi str. P-stx-12]
123	NC_016854	378444663	YP_005232295.1	sensor protein PhoQ, regulator of virulence determinants [Salmonella enterica subsp. enterica serovar Typhimurium str. D23580]
123	NC_016856	378449631	YP_005236990.1	sensor protein PhoQ [Salmonella enterica subsp. enterica serovar Typhimurium str. 14028S]
123	NC_016857	379700401	YP_005242129.1	sensor protein PhoQ [Salmonella enterica subsp. enterica serovar Typhimurium str. ST4/74]
123	NC_016860	378983790	YP_005246945.1	sensor kinase PhoQ [Salmonella enterica subsp. enterica serovar Typhimurium str. T000240]
123	NC_016863	378988574	YP_005251738.1	sensor protein PhoQ [Salmonella enterica subsp. enterica serovar Typhimurium str. UK-1]
123	NC_017046	383495952	YP_005396641.1	sensor protein PhoQ, regulator of virulence determinants [Salmonella enterica subsp. enterica serovar Typhimurium str. 798]
123	NC_017623	386591092	YP_006087492.1	Sensor protein PhoQ [Salmonella enterica subsp. enterica serovar Heidelberg str. B182]
123	NC_020307	452120601	YP_007470849.1	sensor protein PhoQ [Salmonella enterica subsp. enterica serovar Javiana str. CFSAN001992]
123	NC_021151	482903042	YP_007901602.1	sensor protein PhoQ [Salmonella enterica subsp. enterica serovar Typhimurium str. U288]
123	NC_021176	488654205	YP_007926008.1	sensor protein PhoQ [Salmonella enterica subsp. enterica serovar Typhi str. Ty21a]
123	NC_021810	525817118	YP_008247136.1	sensor protein PhoQ [Salmonella enterica subsp. enterica serovar Heidelberg str. 41578]
123	NC_021812	525826930	YP_008249430.1	sensor protein PhoQ [Salmonella enterica subsp. enterica serovar Heidelberg str. CFSAN002069]
123	NC_021814	525838509	YP_008255575.1	sensor protein PhoQ [Salmonella enterica subsp. enterica serovar Typhimurium var. 5- str. CFSAN001921]
123	NC_021818	525857386	YP_008260421.1	sensor protein PhoQ [Salmonella enterica subsp. enterica serovar Cubana str. CFSAN002050]
123	NC_021820	526219945	YP_008265431.1	sensor protein PhoQ [Salmonella enterica subsp. enterica serovar 4,[5],12:i:- str. 08-1736]
123	NC_021844	525947576	YP_008308997.1	sensor protein PhoQ [Salmonella enterica subsp. enterica serovar Bareilly str. CFSAN000189]
123	NC_021902	528819012	YP_008360215.1	Virulence sensor histidine kinase PhoQ [Salmonella enterica subsp. enterica serovar Newport str. USMARC-S3124.1]
123	NC_021984	529219493	YP_008380470.1	sensor protein PhoQ [Salmonella enterica subsp. enterica serovar Pullorum str. S06004]
123	NC_022221	537436342	YP_008480719.1	sensor protein PhoQ, regulator of virulence determinants [Salmonella enterica subsp. enterica serovar Gallinarum/pullorum str. CDC1983-67]
123	NC_022241	538361800	YP_008505085.1	sensor protein PhoQ [Salmonella enterica subsp. enterica serovar Bovismorbificans str. 3114]
123	NC_022525	549479095	YP_008613018.1	sensor protein PhoQ [Salmonella enterica subsp. enterica serovar Thompson str. RM6836]
123	NC_022544	549723871	YP_008644061.1	sensor protein PhoQ, regulator of virulence determinants [Salmonella enterica subsp. enterica serovar Typhimurium str. DT2]
123	NC_022569	550900606	YP_008669698.1	sensor protein PhoQ, regulator of virulence determinants [Salmonella enterica subsp. enterica serovar Typhimurium str. DT104]
127	NC_003197	16766596	NP_462211.1	D-alanyl-D-alanine carboxypeptidase [Salmonella enterica subsp. enterica serovar Typhimurium str. LT2]
127	NC_003198	16762062	NP_457679.1	Penicillin-binding protein (D-alanyl-D-alanine carboxypeptidase) [Salmonella enterica subsp. enterica serovar Typhi str. CT18]
127	NC_004631	29143551	NP_806893.1	D-alanyl-D-alanine carboxypeptidase/endopeptidase [Salmonella enterica subsp. enterica serovar Typhi str. Ty2]
127	NC_006511	56415229	YP_152304.1	penicillin-binding protein [Salmonella enterica subsp. enterica serovar Paratyphi A str. ATCC 9150]
127	NC_006905	62181808	YP_218225.1	D-alanyl-D-alanine carboxypeptidase [Salmonella enterica subsp. enterica serovar Choleraesuis str. SC-B67]
127	NC_010067	161506137	YP_001573249.1	D-alanyl-D-alanine carboxypeptidase/endopeptidase [Salmonella enterica subsp. arizonae serovar 62:z4,z23:- str. RSK2980]
127	NC_010102	161616308	YP_001590273.1	D-alanyl-D-alanine carboxypeptidase/endopeptidase [Salmonella enterica subsp. enterica serovar Paratyphi B str. SPB7]
127	NC_011080	194446146	YP_002042557.1	D-alanyl-D-alanine carboxypeptidase [Salmonella enterica subsp. enterica serovar Newport str. SL254]
127	NC_011083	194450548	YP_002047328.1	D-alanyl-D-alanine carboxypeptidase [Salmonella enterica subsp. enterica serovar Heidelberg str. SL476]
127	NC_011094	194734972	YP_002116249.1	D-alanyl-D-alanine carboxypeptidase [Salmonella enterica subsp. enterica serovar Schwarzengrund str. CVM19633]
127	NC_011147	197364159	YP_002143796.1	D-alanyl-D-alanine carboxypeptidase [Salmonella enterica subsp. enterica serovar Paratyphi A str. AKU_12601]
127	NC_011149	197248961	YP_002148225.1	D-alanyl-D-alanine carboxypeptidase [Salmonella enterica subsp. enterica serovar Agona str. SL483]
127	NC_011205	198245882	YP_002217272.1	D-alanyl-D-alanine carboxypeptidase/endopeptidase [Salmonella enterica subsp. enterica serovar Dublin str. CT_02021853]
127	NC_011274	205354201	YP_002228002.1	D-alanyl-D-alanine carboxypeptidase/endopeptidase [Salmonella enterica subsp. enterica serovar Gallinarum str. 287/91]
127	NC_011294	207858548	YP_002245199.1	D-alanyl-D-alanine carboxypeptidase [Salmonella enterica subsp. enterica serovar Enteritidis str. P125109]
127	NC_012125	224585096	YP_002638895.1	D-alanyl-D-alanine carboxypeptidase/endopeptidase [Salmonella enterica subsp. enterica serovar Paratyphi C strain RKS4594]
127	NC_016810	378701200	YP_005183158.1	Penicillin-binding protein (D-alanyl-D-alanine carboxypeptidase) [Salmonella enterica subsp. enterica serovar Typhimurium str. SL1344]
127	NC_016831	378956913	YP_005214400.1	Penicillin-binding protein (D-alanyl-D-alanine carboxypeptidase) [Salmonella enterica subsp. enterica serovar Gallinarum/pullorum str. RKS5078]
127	NC_016832	378961392	YP_005218878.1	D-alanyl-D-alanine carboxypeptidase dacB [Salmonella enterica subsp. enterica serovar Typhi str. P-stx-12]
127	NC_016854	378446686	YP_005234318.1	Penicillin-binding protein (D-alanyl-D-alanine carboxypeptidase) [Salmonella enterica subsp. enterica serovar Typhimurium str. D23580]
127	NC_016856	378452119	YP_005239479.1	D-alanyl-D-alanine carboxypeptidase [Salmonella enterica subsp. enterica serovar Typhimurium str. 14028S]
127	NC_016857	379702560	YP_005244288.1	D-alanyl-D-alanine carboxypeptidase [Salmonella enterica subsp. enterica serovar Typhimurium str. ST4/74]
127	NC_016860	378985896	YP_005249052.1	D-alanyl-D-alanine carboxypeptidase [Salmonella enterica subsp. enterica serovar Typhimurium str. T000240]
127	NC_016863	378990611	YP_005253775.1	D-alanyl-D-alanine carboxypeptidase [Salmonella enterica subsp. enterica serovar Typhimurium str. UK-1]
127	NC_017046	383497954	YP_005398643.1	Penicillin-binding protein (D-alanyl-D-alanine carboxypeptidase) [Salmonella enterica subsp. enterica serovar Typhimurium str. 798]
127	NC_017623	386592984	YP_006089384.1	D-alanyl-D-alanine carboxypeptidase [Salmonella enterica subsp. enterica serovar Heidelberg str. B182]
127	NC_020307	452122882	YP_007473130.1	D-alanyl-D-alanine carboxypeptidase/endopeptidase [Salmonella enterica subsp. enterica serovar Javiana str. CFSAN001992]
127	NC_021151	482905867	YP_007904427.1	D-alanyl-D-alanine carboxypeptidase/endopeptidase [Salmonella enterica subsp. enterica serovar Typhimurium str. U288]
127	NC_021176	488655674	YP_007927477.1	D-alanyl-D-alanine carboxypeptidase/endopeptidase [Salmonella enterica subsp. enterica serovar Typhi str. Ty21a]
127	NC_021810	525814576	YP_008244594.1	D-alanyl-D-alanine carboxypeptidase/endopeptidase [Salmonella enterica subsp. enterica serovar Heidelberg str. 41578]
127	NC_021812	525828923	YP_008251904.1	D-alanyl-D-alanine carboxypeptidase [Salmonella enterica subsp. enterica serovar Heidelberg str. CFSAN002069]
127	NC_021814	525836869	YP_008253519.1	D-alanyl-D-alanine carboxypeptidase [Salmonella enterica subsp. enterica serovar Typhimurium var. 5- str. CFSAN001921]
127	NC_021818	525859024	YP_008262555.1	D-alanyl-D-alanine carboxypeptidase [Salmonella enterica subsp. enterica serovar Cubana str. CFSAN002050]
127	NC_021820	526221635	YP_008267497.1	D-alanyl-D-alanine carboxypeptidase [Salmonella enterica subsp. enterica serovar 4,[5],12:i:- str. 08-1736]
127	NC_021844	525946002	YP_008307034.1	D-alanyl-D-alanine carboxypeptidase [Salmonella enterica subsp. enterica serovar Bareilly str. CFSAN000189]
127	NC_021902	528821135	YP_008362338.1	D-alanyl-D-alanine carboxypeptidase dacB [Salmonella enterica subsp. enterica serovar Newport str. USMARC-S3124.1]
127	NC_021984	529221084	YP_008382537.1	D-alanyl-D-alanine carboxypeptidase [Salmonella enterica subsp. enterica serovar Pullorum str. S06004]
127	NC_022221	537438479	YP_008482856.1	D-alanyl-D-alanine carboxypeptidase [Salmonella enterica subsp. enterica serovar Gallinarum/pullorum str. CDC1983-67]
127	NC_022241	538363898	YP_008507183.1	D-alanyl-D-alanine carboxypeptidase [Salmonella enterica subsp. enterica serovar Bovismorbificans str. 3114]
127	NC_022525	549480661	YP_008614946.1	D-alanyl-D-alanine carboxypeptidase [Salmonella enterica subsp. enterica serovar Thompson str. RM6836]
127	NC_022544	549725860	YP_008646050.1	Penicillin-binding protein (D-alanyl-D-alanine carboxypeptidase) [Salmonella enterica subsp. enterica serovar Typhimurium str. DT2]
127	NC_022569	550902655	YP_008671747.1	Penicillin-binding protein (D-alanyl-D-alanine carboxypeptidase) [Salmonella enterica subsp. enterica serovar Typhimurium str. DT104]
139	NC_003197	16763740	NP_459355.1	cytochrome BD2 subunit I [Salmonella enterica subsp. enterica serovar Typhimurium str. LT2]
139	NC_003198	16759338	NP_454955.1	probable terminal oxidase subunit I [Salmonella enterica subsp. enterica serovar Typhi str. CT18]
139	NC_004631	29142890	NP_806232.1	terminal oxidase subunit I [Salmonella enterica subsp. enterica serovar Typhi str. Ty2]
139	NC_006511	56414483	YP_151558.1	terminal oxidase subunit I [Salmonella enterica subsp. enterica serovar Paratyphi A str. ATCC 9150]
139	NC_006905	62178971	YP_215388.1	cytochrome BD2 subunit I [Salmonella enterica subsp. enterica serovar Choleraesuis str. SC-B67]
139	NC_010067	161504450	YP_001571562.1	hypothetical protein SARI_02563 [Salmonella enterica subsp. arizonae serovar 62:z4,z23:- str. RSK2980]
139	NC_010102	161615466	YP_001589431.1	hypothetical protein SPAB_03237 [Salmonella enterica subsp. enterica serovar Paratyphi B str. SPB7]
139	NC_011080	194445894	YP_002039598.1	cytochrome bd-II oxidase subunit 1 [Salmonella enterica subsp. enterica serovar Newport str. SL254]
139	NC_011083	194447398	YP_002044390.1	cytochrome bd-II oxidase subunit 1 [Salmonella enterica subsp. enterica serovar Heidelberg str. SL476]
139	NC_011094	194736276	YP_002113388.1	cytochrome bd-II oxidase subunit 1 [Salmonella enterica subsp. enterica serovar Schwarzengrund str. CVM19633]
139	NC_011147	197363404	YP_002143041.1	terminal oxidase subunit I [Salmonella enterica subsp. enterica serovar Paratyphi A str. AKU_12601]
139	NC_011149	197248698	YP_002145339.1	cyanide-insensitive oxidase CioA [Salmonella enterica subsp. enterica serovar Agona str. SL483]
139	NC_011205	198244899	YP_002214312.1	cytochrome bd-II oxidase subunit 1 [Salmonella enterica subsp. enterica serovar Dublin str. CT_02021853]
139	NC_011274	205351675	YP_002225476.1	terminal oxidase subunit I [Salmonella enterica subsp. enterica serovar Gallinarum str. 287/91]
139	NC_011294	207855842	YP_002242493.1	terminal oxidase subunit I [Salmonella enterica subsp. enterica serovar Enteritidis str. P125109]
139	NC_012125	224582197	YP_002635995.1	terminal oxidase subunit I [Salmonella enterica subsp. enterica serovar Paratyphi C strain RKS4594]
139	NC_016810	378698324	YP_005180281.1	terminal oxidase subunit I [Salmonella enterica subsp. enterica serovar Typhimurium str. SL1344]
139	NC_016831	378956257	YP_005213744.1	putative terminal oxidase subunit I [Salmonella enterica subsp. enterica serovar Gallinarum/pullorum str. RKS5078]
139	NC_016832	378960681	YP_005218167.1	Cytochrome bd ubiquinol oxidase, subunit I [Salmonella enterica subsp. enterica serovar Typhi str. P-stx-12]
139	NC_016854	378443864	YP_005231496.1	terminal oxidase subunit I [Salmonella enterica subsp. enterica serovar Typhimurium str. D23580]
139	NC_016856	378448679	YP_005236038.1	cytochrome BD2 subunit I [Salmonella enterica subsp. enterica serovar Typhimurium str. 14028S]
139	NC_016857	379699574	YP_005241302.1	cytochrome BD2 subunit I [Salmonella enterica subsp. enterica serovar Typhimurium str. ST4/74]
139	NC_016860	378982963	YP_005246118.1	putative terminal oxidase subunit I [Salmonella enterica subsp. enterica serovar Typhimurium str. T000240]
139	NC_016863	378987761	YP_005250925.1	cytochrome BD2 subunit I [Salmonella enterica subsp. enterica serovar Typhimurium str. UK-1]
139	NC_017046	383495170	YP_005395859.1	terminal oxidase subunit I [Salmonella enterica subsp. enterica serovar Typhimurium str. 798]
139	NC_017623	386590294	YP_006086694.1	putative Cytochrome bd2, subunit I [Salmonella enterica subsp. enterica serovar Heidelberg str. B182]
139	NC_020307	452121377	YP_007471625.1	putative terminal oxidase subunit I [Salmonella enterica subsp. enterica serovar Javiana str. CFSAN001992]
139	NC_021151	482905055	YP_007903615.1	putative terminal oxidase subunit I [Salmonella enterica subsp. enterica serovar Typhimurium str. U288]
139	NC_021176	488654999	YP_007926802.1	terminal oxidase subunit I [Salmonella enterica subsp. enterica serovar Typhi str. Ty21a]
139	NC_021810	525816291	YP_008246309.1	putative terminal oxidase subunit I [Salmonella enterica subsp. enterica serovar Heidelberg str. 41578]
139	NC_021812	525827603	YP_008250249.1	cytochrome D ubiquinol oxidase subunit I [Salmonella enterica subsp. enterica serovar Heidelberg str. CFSAN002069]
139	NC_021814	525839178	YP_008256401.1	cytochrome D ubiquinol oxidase subunit I [Salmonella enterica subsp. enterica serovar Typhimurium var. 5- str. CFSAN001921]
139	NC_021818	525856731	YP_008259610.1	cytochrome D ubiquinol oxidase subunit I [Salmonella enterica subsp. enterica serovar Cubana str. CFSAN002050]
139	NC_021820	526219266	YP_008264610.1	cytochrome D ubiquinol oxidase subunit I [Salmonella enterica subsp. enterica serovar 4,[5],12:i:- str. 08-1736]
139	NC_021844	525948245	YP_008309796.1	cytochrome D ubiquinol oxidase subunit I [Salmonella enterica subsp. enterica serovar Bareilly str. CFSAN000189]
139	NC_021902	528818070	YP_008359273.1	Cytochrome bd quinol oxidase subunit 1 apoprotein [Salmonella enterica subsp. enterica serovar Newport str. USMARC-S3124.1]
139	NC_021984	529220535	YP_008381806.1	cytochrome D ubiquinol oxidase subunit I [Salmonella enterica subsp. enterica serovar Pullorum str. S06004]
139	NC_022221	537437825	YP_008482202.1	putative terminal oxidase subunit I [Salmonella enterica subsp. enterica serovar Gallinarum/pullorum str. CDC1983-67]
139	NC_022241	538360908	YP_008504193.1	probable terminal oxidase subunit I [Salmonella enterica subsp. enterica serovar Bovismorbificans str. 3114]
139	NC_022525	549478427	YP_008612210.1	cytochrome D ubiquinol oxidase subunit I [Salmonella enterica subsp. enterica serovar Thompson str. RM6836]
139	NC_022544	549723074	YP_008643264.1	probable terminal oxidase subunit I [Salmonella enterica subsp. enterica serovar Typhimurium str. DT2]
139	NC_022569	550899814	YP_008668906.1	probable terminal oxidase subunit I [Salmonella enterica subsp. enterica serovar Typhimurium str. DT104]
140	NC_003197	16765460	NP_461075.1	signal transduction histidine-protein kinase BaeS [Salmonella enterica subsp. enterica serovar Typhimurium str. LT2]
140	NC_003198	16761059	NP_456676.1	putative two-component system sensor kinase [Salmonella enterica subsp. enterica serovar Typhi str. CT18]
140	NC_004631	29141244	NP_804586.1	signal transduction histidine-protein kinase BaeS [Salmonella enterica subsp. enterica serovar Typhi str. Ty2]
140	NC_006511	56412970	YP_150045.1	two-component system sensor kinase [Salmonella enterica subsp. enterica serovar Paratyphi A str. ATCC 9150]
140	NC_006905	62180702	YP_217119.1	signal transduction histidine-protein kinase BaeS [Salmonella enterica subsp. enterica serovar Choleraesuis str. SC-B67]
140	NC_010067	161502713	YP_001569825.1	signal transduction histidine-protein kinase BaeS [Salmonella enterica subsp. arizonae serovar 62:z4,z23:- str. RSK2980]
140	NC_010102	161613185	YP_001587150.1	signal transduction histidine-protein kinase BaeS [Salmonella enterica subsp. enterica serovar Paratyphi B str. SPB7]
140	NC_011080	194445990	YP_002041402.1	signal transduction histidine-protein kinase BaeS [Salmonella enterica subsp. enterica serovar Newport str. SL254]
140	NC_011083	194449300	YP_002046182.1	signal transduction histidine-protein kinase BaeS [Salmonella enterica subsp. enterica serovar Heidelberg str. SL476]
140	NC_011094	194737114	YP_002115221.1	signal transduction histidine-protein kinase BaeS [Salmonella enterica subsp. enterica serovar Schwarzengrund str. CVM19633]
140	NC_011147	197361900	YP_002141536.1	signal transduction histidine-protein kinase BaeS [Salmonella enterica subsp. enterica serovar Paratyphi A str. AKU_12601]
140	NC_011149	197248256	YP_002147091.1	signal transduction histidine-protein kinase BaeS [Salmonella enterica subsp. enterica serovar Agona str. SL483]
140	NC_011205	198244518	YP_002216217.1	signal transduction histidine-protein kinase BaeS [Salmonella enterica subsp. enterica serovar Dublin str. CT_02021853]
140	NC_011274	205353272	YP_002227073.1	signal transduction histidine-protein kinase BaeS [Salmonella enterica subsp. enterica serovar Gallinarum str. 287/91]
140	NC_011294	207857566	YP_002244217.1	signal transduction histidine-protein kinase BaeS [Salmonella enterica subsp. enterica serovar Enteritidis str. P125109]
140	NC_012125	224583380	YP_002637178.1	signal transduction histidine-protein kinase BaeS [Salmonella enterica subsp. enterica serovar Paratyphi C strain RKS4594]
140	NC_016810	378700043	YP_005182000.1	putative two-component system sensor kinase [Salmonella enterica subsp. enterica serovar Typhimurium str. SL1344]
140	NC_016831	378954511	YP_005211998.1	putative two-component system sensor kinase [Salmonella enterica subsp. enterica serovar Gallinarum/pullorum str. RKS5078]
140	NC_016832	378958891	YP_005216377.1	Signal transduction histidine-protein kinase BaeS [Salmonella enterica subsp. enterica serovar Typhi str. P-stx-12]
140	NC_016854	378445566	YP_005233198.1	putative two-component system sensor kinase [Salmonella enterica subsp. enterica serovar Typhimurium str. D23580]
140	NC_016856	378450810	YP_005238169.1	signal transduction histidine-protein kinase BaeS [Salmonella enterica subsp. enterica serovar Typhimurium str. 14028S]
140	NC_016857	379701356	YP_005243084.1	signal transduction histidine-protein kinase BaeS [Salmonella enterica subsp. enterica serovar Typhimurium str. ST4/74]
140	NC_016860	378984694	YP_005247849.1	two-component sensor kinase BaeS [Salmonella enterica subsp. enterica serovar Typhimurium str. T000240]
140	NC_016863	378989517	YP_005252681.1	signal transduction histidine-protein kinase BaeS [Salmonella enterica subsp. enterica serovar Typhimurium str. UK-1]
140	NC_017046	383496839	YP_005397528.1	two-component system sensor kinase [Salmonella enterica subsp. enterica serovar Typhimurium str. 798]
140	NC_017623	386591943	YP_006088343.1	Sensory histidine kinase BaeS [Salmonella enterica subsp. enterica serovar Heidelberg str. B182]
140	NC_020307	452119672	YP_007469920.1	signal transduction histidine-protein kinase BaeS [Salmonella enterica subsp. enterica serovar Javiana str. CFSAN001992]
140	NC_021151	482903947	YP_007902507.1	signal transduction histidine-protein kinase BaeS [Salmonella enterica subsp. enterica serovar Typhimurium str. U288]
140	NC_021176	488653280	YP_007925083.1	signal transduction histidine-protein kinase BaeS [Salmonella enterica subsp. enterica serovar Typhi str. Ty21a]
140	NC_021810	525818021	YP_008248039.1	signal transduction histidine-protein kinase BaeS [Salmonella enterica subsp. enterica serovar Heidelberg str. 41578]
140	NC_021812	525829796	YP_008252972.1	signal transduction histidine-protein kinase BaeS [Salmonella enterica subsp. enterica serovar Heidelberg str. CFSAN002069]
140	NC_021814	525837739	YP_008254614.1	signal transduction histidine-protein kinase BaeS [Salmonella enterica subsp. enterica serovar Typhimurium var. 5- str. CFSAN001921]
140	NC_021818	525858170	YP_008261412.1	signal transduction histidine-protein kinase BaeS [Salmonella enterica subsp. enterica serovar Cubana str. CFSAN002050]
140	NC_021820	526220714	YP_008266381.1	signal transduction histidine-protein kinase BaeS [Salmonella enterica subsp. enterica serovar 4,[5],12:i:- str. 08-1736]
140	NC_021844	525946858	YP_008308101.1	signal transduction histidine-protein kinase BaeS [Salmonella enterica subsp. enterica serovar Bareilly str. CFSAN000189]
140	NC_021902	528819952	YP_008361155.1	Signal transduction histidine-protein kinase BaeS [Salmonella enterica subsp. enterica serovar Newport str. USMARC-S3124.1]
140	NC_021984	529219316	YP_008380229.1	signal transduction histidine-protein kinase BaeS [Salmonella enterica subsp. enterica serovar Pullorum str. S06004]
140	NC_022221	537436080	YP_008480457.1	putative two-component system sensor kinase [Salmonella enterica subsp. enterica serovar Gallinarum/pullorum str. CDC1983-67]
140	NC_022241	538362753	YP_008506038.1	hypothetical protein BN855_22200 [Salmonella enterica subsp. enterica serovar Bovismorbificans str. 3114]
140	NC_022525	549479811	YP_008613902.1	signal transduction histidine-protein kinase BaeS [Salmonella enterica subsp. enterica serovar Thompson str. RM6836]
140	NC_022544	549724796	YP_008644986.1	putative two-component system sensor kinase [Salmonella enterica subsp. enterica serovar Typhimurium str. DT2]
140	NC_022569	550901569	YP_008670661.1	putative two-component system sensor kinase [Salmonella enterica subsp. enterica serovar Typhimurium str. DT104]
152	NC_003197	16767324	NP_462939.1	two-component sensor protein [Salmonella enterica subsp. enterica serovar Typhimurium str. LT2]
152	NC_003198	16762376	NP_457993.1	two-component sensor kinase protein [Salmonella enterica subsp. enterica serovar Typhi str. CT18]
152	NC_004631	29143864	NP_807206.1	two-component sensor protein [Salmonella enterica subsp. enterica serovar Typhi str. Ty2]
152	NC_006511	56415904	YP_152979.1	two-component sensor kinase protein [Salmonella enterica subsp. enterica serovar Paratyphi A str. ATCC 9150]
152	NC_006905	62182519	YP_218936.1	two-component sensor protein [Salmonella enterica subsp. enterica serovar Choleraesuis str. SC-B67]
152	NC_010067	161505431	YP_001572543.1	two-component sensor protein [Salmonella enterica subsp. arizonae serovar 62:z4,z23:- str. RSK2980]
152	NC_010102	161617189	YP_001591154.1	two-component sensor protein [Salmonella enterica subsp. enterica serovar Paratyphi B str. SPB7]
152	NC_011080	194444500	YP_002043283.1	two-component sensor protein [Salmonella enterica subsp. enterica serovar Newport str. SL254]
152	NC_011083	194447690	YP_002048062.1	two-component sensor protein [Salmonella enterica subsp. enterica serovar Heidelberg str. SL476]
152	NC_011094	194737962	YP_002116982.1	two-component sensor protein [Salmonella enterica subsp. enterica serovar Schwarzengrund str. CVM19633]
152	NC_011147	197364833	YP_002144470.1	two-component sensor protein [Salmonella enterica subsp. enterica serovar Paratyphi A str. AKU_12601]
152	NC_011149	197251368	YP_002148989.1	two-component sensor protein [Salmonella enterica subsp. enterica serovar Agona str. SL483]
152	NC_011205	198245079	YP_002217985.1	two-component sensor protein [Salmonella enterica subsp. enterica serovar Dublin str. CT_02021853]
152	NC_011274	205354364	YP_002228165.1	two-component sensor protein [Salmonella enterica subsp. enterica serovar Gallinarum str. 287/91]
152	NC_011294	207859246	YP_002245897.1	two-component sensor protein [Salmonella enterica subsp. enterica serovar Enteritidis str. P125109]
152	NC_012125	224585871	YP_002639670.1	two-component sensor protein [Salmonella enterica subsp. enterica serovar Paratyphi C strain RKS4594]
152	NC_016810	378701917	YP_005183875.1	two-component sensor kinase protein [Salmonella enterica subsp. enterica serovar Typhimurium str. SL1344]
152	NC_016831	378957202	YP_005214689.1	two-component sensor kinase protein [Salmonella enterica subsp. enterica serovar Gallinarum/pullorum str. RKS5078]
152	NC_016832	378961722	YP_005219208.1	hypothetical protein STBHUCCB_37440 [Salmonella enterica subsp. enterica serovar Typhi str. P-stx-12]
152	NC_016854	378447396	YP_005235028.1	two-component sensor kinase protein [Salmonella enterica subsp. enterica serovar Typhimurium str. D23580]
152	NC_016856	378452974	YP_005240334.1	two-component sensor protein [Salmonella enterica subsp. enterica serovar Typhimurium str. 14028S]
152	NC_016857	379703304	YP_005245032.1	two-component sensor protein [Salmonella enterica subsp. enterica serovar Typhimurium str. ST4/74]
152	NC_016860	378986745	YP_005249901.1	two-component sensor kinase [Salmonella enterica subsp. enterica serovar Typhimurium str. T000240]
152	NC_016863	378991340	YP_005254504.1	two-component sensor protein [Salmonella enterica subsp. enterica serovar Typhimurium str. UK-1]
152	NC_017046	383498659	YP_005399348.1	two-component sensor kinase protein [Salmonella enterica subsp. enterica serovar Typhimurium str. 798]
152	NC_017623	386589411	YP_006085811.1	Copper sensory histidine kinase CpxA [Salmonella enterica subsp. enterica serovar Heidelberg str. B182]
152	NC_020307	452122165	YP_007472413.1	two-component sensor protein [Salmonella enterica subsp. enterica serovar Javiana str. CFSAN001992]
152	NC_021151	482906609	YP_007905169.1	two-component sensor protein [Salmonella enterica subsp. enterica serovar Typhimurium str. U288]
152	NC_021176	488656000	YP_007927803.1	two-component sensor protein [Salmonella enterica subsp. enterica serovar Typhi str. Ty21a]
152	NC_021810	525815322	YP_008245340.1	two-component sensor protein [Salmonella enterica subsp. enterica serovar Heidelberg str. 41578]
152	NC_021812	525828317	YP_008251154.1	histidine kinase [Salmonella enterica subsp. enterica serovar Heidelberg str. CFSAN002069]
152	NC_021814	525839931	YP_008257342.1	histidine kinase [Salmonella enterica subsp. enterica serovar Typhimurium var. 5- str. CFSAN001921]
152	NC_021818	525855985	YP_008258606.1	histidine kinase [Salmonella enterica subsp. enterica serovar Cubana str. CFSAN002050]
152	NC_021820	526218123	YP_008263211.1	histidine kinase [Salmonella enterica subsp. enterica serovar 4,[5],12:i:- str. 08-1736]
152	NC_021844	525948904	YP_008310669.1	histidine kinase [Salmonella enterica subsp. enterica serovar Bareilly str. CFSAN000189]
152	NC_021902	528821380	YP_008362583.1	Sensor protein CpxA [Salmonella enterica subsp. enterica serovar Newport str. USMARC-S3124.1]
152	NC_021984	529221310	YP_008382803.1	histidine kinase [Salmonella enterica subsp. enterica serovar Pullorum str. S06004]
152	NC_022221	537438769	YP_008483146.1	two-component sensor kinase protein [Salmonella enterica subsp. enterica serovar Gallinarum/pullorum str. CDC1983-67]
152	NC_022241	538364645	YP_008507930.1	sensor protein CpxA [Salmonella enterica subsp. enterica serovar Bovismorbificans str. 3114]
152	NC_022525	549481263	YP_008615670.1	histidine kinase [Salmonella enterica subsp. enterica serovar Thompson str. RM6836]
152	NC_022544	549726585	YP_008646775.1	two-component sensor kinase protein [Salmonella enterica subsp. enterica serovar Typhimurium str. DT2]
152	NC_022569	550903419	YP_008672511.1	two-component sensor kinase protein [Salmonella enterica subsp. enterica serovar Typhimurium str. DT104]
157	NC_003197	16763514	NP_459129.1	UDP-N-acetylmuramoyl-tripeptide--D-alanyl-D-alanine ligase [Salmonella enterica subsp. enterica serovar Typhimurium str. LT2]
157	NC_003198	16759119	NP_454736.1	UDP-N-acetylmuramoylalanyl-D-glutamyl-2,6-diami nopimelate--D-alan alanyl ligase [Salmonella enterica subsp. enterica serovar Typhi str. CT18]
157	NC_004631	29140669	NP_804011.1	UDP-N-acetylmuramoyl-tripeptide--D-alanyl-D-alanine ligase [Salmonella enterica subsp. enterica serovar Typhi str. Ty2]
157	NC_006511	56412396	YP_149471.1	UDP-N-acetylmuramoylalanyl-D-glutamyl-2,6-diami nopimelate--D-alan alanyl ligase [Salmonella enterica subsp. enterica serovar Paratyphi A str. ATCC 9150]
157	NC_006905	62178691	YP_215108.1	UDP-N-acetylmuramoyl-tripeptide--D-alanyl-D-alanine ligase [Salmonella enterica subsp. enterica serovar Choleraesuis str. SC-B67]
157	NC_010067	161504754	YP_001571866.1	UDP-N-acetylmuramoyl-tripeptide--D-alanyl-D-alanine ligase [Salmonella enterica subsp. arizonae serovar 62:z4,z23:- str. RSK2980]
157	NC_010102	161612468	YP_001586433.1	UDP-N-acetylmuramoyl-tripeptide--D-alanyl-D-alanine ligase [Salmonella enterica subsp. enterica serovar Paratyphi B str. SPB7]
157	NC_011080	194444164	YP_002039356.1	UDP-N-acetylmuramoyl-tripeptide--D-alanyl-D-alanine ligase [Salmonella enterica subsp. enterica serovar Newport str. SL254]
157	NC_011083	194448592	YP_002044094.1	UDP-N-acetylmuramoyl-tripeptide--D-alanyl-D-alanine ligase [Salmonella enterica subsp. enterica serovar Heidelberg str. SL476]
157	NC_011094	194736510	YP_002113142.1	UDP-N-acetylmuramoyl-tripeptide--D-alanyl-D-alanine ligase [Salmonella enterica subsp. enterica serovar Schwarzengrund str. CVM19633]
157	NC_011147	197361332	YP_002140967.1	UDP-N-acetylmuramoyl-tripeptide--D-alanyl-D-alanine ligase [Salmonella enterica subsp. enterica serovar Paratyphi A str. AKU_12601]
157	NC_011149	197251461	YP_002145110.1	UDP-N-acetylmuramoyl-tripeptide--D-alanyl-D-alanine ligase [Salmonella enterica subsp. enterica serovar Agona str. SL483]
157	NC_011205	198246066	YP_002214076.1	UDP-N-acetylmuramoyl-tripeptide--D-alanyl-D-alanine ligase [Salmonella enterica subsp. enterica serovar Dublin str. CT_02021853]
157	NC_011274	205351463	YP_002225264.1	UDP-N-acetylmuramoyl-tripeptide--D-alanyl-D-alanine ligase [Salmonella enterica subsp. enterica serovar Gallinarum str. 287/91]
157	NC_011294	207855638	YP_002242289.1	UDP-N-acetylmuramoyl-tripeptide--D-alanyl-D-alanine ligase [Salmonella enterica subsp. enterica serovar Enteritidis str. P125109]
157	NC_012125	224581967	YP_002635765.1	UDP-N-acetylmuramoyl-tripeptide--D-alanyl-D-alanine ligase [Salmonella enterica subsp. enterica serovar Paratyphi C strain RKS4594]
157	NC_016810	378698104	YP_005180061.1	UDP-N-acetylmuramoylalanyl-D-glutamyl-2,6-diami nopimelate--D-alan alanyl ligase [Salmonella enterica subsp. enterica serovar Typhimurium str. SL1344]
157	NC_016831	378953928	YP_005211415.1	UDP-N-acetylmuramoylalanyl-D-glutamyl-2,6-diami nopimelate--D-alan alanyl ligase [Salmonella enterica subsp. enterica serovar Gallinarum/pullorum str. RKS5078]
157	NC_016832	378958271	YP_005215757.1	UDP-N-acetylmuramoyl-tripeptide--D-alanyl-D- alanine ligase [Salmonella enterica subsp. enterica serovar Typhi str. P-stx-12]
157	NC_016854	378443578	YP_005231210.1	UDP-N-acetylmuramoylalanyl-D-glutamyl-2,6-diami nopimelate--D-alan alanyl ligase [Salmonella enterica subsp. enterica serovar Typhimurium str. D23580]
157	NC_016856	378448424	YP_005235783.1	UDP-N-acetylmuramoyl-tripeptide--D-alanyl-D- alanine ligase [Salmonella enterica subsp. enterica serovar Typhimurium str. 14028S]
157	NC_016857	379699345	YP_005241073.1	UDP-N-acetylmuramoyl-tripeptide--D-alanyl-D- alanine ligase [Salmonella enterica subsp. enterica serovar Typhimurium str. ST4/74]
157	NC_016860	378982665	YP_005245820.1	UDP-N-acetylmuramoyl-tripeptide--D-alanyl-D- alanine ligase [Salmonella enterica subsp. enterica serovar Typhimurium str. T000240]
157	NC_016863	378987530	YP_005250694.1	UDP-N-acetylmuramoyl-tripeptide--D-alanyl-D- alanine ligase [Salmonella enterica subsp. enterica serovar Typhimurium str. UK-1]
157	NC_017046	383494946	YP_005395635.1	UDP-N-acetylmuramoylalanyl-D-glutamyl-2,6-diami nopimelate--D-alan alanyl ligase [Salmonella enterica subsp. enterica serovar Typhimurium str. 798]
157	NC_017623	386590003	YP_006086403.1	UDP-N-acetylmuramoyl-tripeptide--D-alanyl-D-alanine ligase [Salmonella enterica subsp. enterica serovar Heidelberg str. B182]
157	NC_020307	452121571	YP_007471819.1	UDP-N-acetylmuramoyl-tripeptide--D-alanyl-D-alanine ligase [Salmonella enterica subsp. enterica serovar Javiana str. CFSAN001992]
157	NC_021151	482902673	YP_007901233.1	UDP-N-acetylmuramoyl-tripeptide--D-alanyl-D-alanine ligase [Salmonella enterica subsp. enterica serovar Typhimurium str. U288]
157	NC_021176	488652689	YP_007924492.1	UDP-N-acetylmuramoyl-tripeptide--D-alanyl-D-alanine ligase [Salmonella enterica subsp. enterica serovar Typhi str. Ty21a]
157	NC_021810	525815981	YP_008245999.1	UDP-N-acetylmuramoyl-tripeptide--D-alanyl-D-alanine ligase [Salmonella enterica subsp. enterica serovar Heidelberg str. 41578]
157	NC_021812	525827828	YP_008250548.1	UDP-N-acetylmuramoyl-tripeptide--D-alanyl-D-alanine ligase [Salmonella enterica subsp. enterica serovar Heidelberg str. CFSAN002069]
157	NC_021814	525839409	YP_008256699.1	UDP-N-acetylmuramoyl-tripeptide--D-alanyl-D-alanine ligase [Salmonella enterica subsp. enterica serovar Typhimurium var. 5- str. CFSAN001921]
157	NC_021818	525856544	YP_008259356.1	UDP-N-acetylmuramoyl-tripeptide--D-alanyl-D-alanine ligase [Salmonella enterica subsp. enterica serovar Cubana str. CFSAN002050]
157	NC_021820	526219077	YP_008264383.1	UDP-N-acetylmuramoyl-tripeptide--D-alanyl-D-alanine ligase [Salmonella enterica subsp. enterica serovar 4,[5],12:i:- str. 08-1736]
157	NC_021844	525948413	YP_008310037.1	UDP-N-acetylmuramoyl-tripeptide--D-alanyl-D-alanine ligase [Salmonella enterica subsp. enterica serovar Bareilly str. CFSAN000189]
157	NC_021902	528817823	YP_008359026.1	UDP-N-acetylmuramoyl-tripeptide--D-alanyl-D- alanine ligase [Salmonella enterica subsp. enterica serovar Newport str. USMARC-S3124.1]
157	NC_021984	529218875	YP_008379712.1	UDP-N-acetylmuramoyl-tripeptide--D-alanyl-D-alanine ligase [Salmonella enterica subsp. enterica serovar Pullorum str. S06004]
157	NC_022221	537435494	YP_008479871.1	UDP-N-acetylmuramoylalanyl-D-glutamyl-2,6-diami nopimelate--D-alan alanyl ligase [Salmonella enterica subsp. enterica serovar Gallinarum/pullorum str. CDC1983-67]
157	NC_022241	538360695	YP_008503980.1	UDP-N-acetylmuramoyl-tripeptide--D-alanyl-D-ala nine ligase [Salmonella enterica subsp. enterica serovar Bovismorbificans str. 3114]
157	NC_022525	549478238	YP_008611957.1	UDP-N-acetylmuramoyl-tripeptide--D-alanyl-D-alanine ligase [Salmonella enterica subsp. enterica serovar Thompson str. RM6836]
157	NC_022544	549722849	YP_008643039.1	UDP-N-acetylmuramoylalanyl-D-glutamyl-2,6-diami nopimelate--D-alan alanyl ligase [Salmonella enterica subsp. enterica serovar Typhimurium str. DT2]
157	NC_022569	550899549	YP_008668641.1	UDP-N-acetylmuramoylalanyl-D-glutamyl-2,6-diami nopimelate--D-alan alanyl ligase [Salmonella enterica subsp. enterica serovar Typhimurium str. DT104]
160	NC_003197	16766789	NP_462404.1	osmolarity sensor protein [Salmonella enterica subsp. enterica serovar Typhimurium str. LT2]
160	NC_003198	16762786	NP_458403.1	two-component sensor kinase EnvZ [Salmonella enterica subsp. enterica serovar Typhi str. CT18]
160	NC_004631	29144273	NP_807615.1	osmolarity sensor protein [Salmonella enterica subsp. enterica serovar Typhi str. Ty2]
160	NC_006511	56415416	YP_152491.1	two-component sensor kinase EnvZ [Salmonella enterica subsp. enterica serovar Paratyphi A str. ATCC 9150]
160	NC_006905	62182003	YP_218420.1	osmolarity sensor protein [Salmonella enterica subsp. enterica serovar Choleraesuis str. SC-B67]
160	NC_010067	161505933	YP_001573045.1	osmolarity sensor protein [Salmonella enterica subsp. arizonae serovar 62:z4,z23:- str. RSK2980]
160	NC_010102	161616541	YP_001590506.1	osmolarity sensor protein [Salmonella enterica subsp. enterica serovar Paratyphi B str. SPB7]
160	NC_011080	194446263	YP_002042752.1	osmolarity sensor protein [Salmonella enterica subsp. enterica serovar Newport str. SL254]
160	NC_011083	194450163	YP_002047525.1	osmolarity sensor protein [Salmonella enterica subsp. enterica serovar Heidelberg str. SL476]
160	NC_011094	194734811	YP_002116443.1	osmolarity sensor protein [Salmonella enterica subsp. enterica serovar Schwarzengrund str. CVM19633]
160	NC_011147	449784991	YP_002143983.2	osmolarity sensor protein [Salmonella enterica subsp. enterica serovar Paratyphi A str. AKU_12601]
160	NC_011149	197250086	YP_002148424.1	osmolarity sensor protein [Salmonella enterica subsp. enterica serovar Agona str. SL483]
160	NC_011205	198243010	YP_002217460.1	osmolarity sensor protein [Salmonella enterica subsp. enterica serovar Dublin str. CT_02021853]
160	NC_011274	205354875	YP_002228676.1	osmolarity sensor protein [Salmonella enterica subsp. enterica serovar Gallinarum str. 287/91]
160	NC_011294	207858741	YP_002245392.1	osmolarity sensor protein [Salmonella enterica subsp. enterica serovar Enteritidis str. P125109]
160	NC_012125	224585295	YP_002639094.1	osmolarity sensor protein [Salmonella enterica subsp. enterica serovar Paratyphi C strain RKS4594]
160	NC_016810	378701395	YP_005183353.1	two-component sensor kinase EnvZ [Salmonella enterica subsp. enterica serovar Typhimurium str. SL1344]
160	NC_016831	378957651	YP_005215138.1	two-component sensor kinase EnvZ [Salmonella enterica subsp. enterica serovar Gallinarum/pullorum str. RKS5078]
160	NC_016832	378962185	YP_005219671.1	Osmolarity sensor protein envZ [Salmonella enterica subsp. enterica serovar Typhi str. P-stx-12]
160	NC_016854	378446877	YP_005234509.1	two-component sensor kinase EnvZ [Salmonella enterica subsp. enterica serovar Typhimurium str. D23580]
160	NC_016856	378452342	YP_005239702.1	osmolarity sensor protein [Salmonella enterica subsp. enterica serovar Typhimurium str. 14028S]
160	NC_016857	379702761	YP_005244489.1	osmolarity sensor protein [Salmonella enterica subsp. enterica serovar Typhimurium str. ST4/74]
160	NC_016860	378986096	YP_005249252.1	osmolarity sensor protein [Salmonella enterica subsp. enterica serovar Typhimurium str. T000240]
160	NC_016863	378990806	YP_005253970.1	osmolarity sensor protein [Salmonella enterica subsp. enterica serovar Typhimurium str. UK-1]
160	NC_017046	383498143	YP_005398832.1	two-component sensor kinase EnvZ [Salmonella enterica subsp. enterica serovar Typhimurium str. 798]
160	NC_017623	386593176	YP_006089576.1	Osmolarity sensory histidine kinase EnvZ [Salmonella enterica subsp. enterica serovar Heidelberg str. B182]
160	NC_020307	452122687	YP_007472935.1	osmolarity sensor protein [Salmonella enterica subsp. enterica serovar Javiana str. CFSAN001992]
160	NC_021151	482906068	YP_007904628.1	osmolarity sensor protein [Salmonella enterica subsp. enterica serovar Typhimurium str. U288]
160	NC_021176	488656444	YP_007928247.1	osmolarity sensor protein [Salmonella enterica subsp. enterica serovar Typhi str. Ty21a]
160	NC_021810	525814772	YP_008244790.1	osmolarity sensor protein [Salmonella enterica subsp. enterica serovar Heidelberg str. 41578]
160	NC_021812	525828756	YP_008251712.1	osmolarity sensor protein [Salmonella enterica subsp. enterica serovar Heidelberg str. CFSAN002069]
160	NC_021814	525840370	YP_008257883.1	osmolarity sensor protein [Salmonella enterica subsp. enterica serovar Typhimurium var. 5- str. CFSAN001921]
160	NC_021818	525859190	YP_008262747.1	osmolarity sensor protein [Salmonella enterica subsp. enterica serovar Cubana str. CFSAN002050]
160	NC_021820	526218563	YP_008263751.1	osmolarity sensor protein [Salmonella enterica subsp. enterica serovar 4,[5],12:i:- str. 08-1736]
160	NC_021844	525945834	YP_008306840.1	osmolarity sensor protein [Salmonella enterica subsp. enterica serovar Bareilly str. CFSAN000189]
160	NC_021902	528817102	YP_008358305.1	Osmolarity sensor protein EnvZ [Salmonella enterica subsp. enterica serovar Newport str. USMARC-S3124.1]
160	NC_021984	529221635	YP_008383209.1	osmolarity sensor protein [Salmonella enterica subsp. enterica serovar Pullorum str. S06004]
160	NC_022221	537439217	YP_008483594.1	two-component sensor kinase EnvZ [Salmonella enterica subsp. enterica serovar Gallinarum/pullorum str. CDC1983-67]
160	NC_022241	538364097	YP_008507382.1	hypothetical protein BN855_35800 [Salmonella enterica subsp. enterica serovar Bovismorbificans str. 3114]
160	NC_022525	549480827	YP_008615138.1	osmolarity sensor protein [Salmonella enterica subsp. enterica serovar Thompson str. RM6836]
160	NC_022544	549726055	YP_008646245.1	two-component sensor kinase EnvZ [Salmonella enterica subsp. enterica serovar Typhimurium str. DT2]
160	NC_022569	550902845	YP_008671937.1	two-component sensor kinase EnvZ [Salmonella enterica subsp. enterica serovar Typhimurium str. DT104]
166	NC_003197	16766998	NP_462613.1	O-antigen ligase [Salmonella enterica subsp. enterica serovar Typhimurium str. LT2]
166	NC_003198	16762597	NP_458214.1	O-antigen ligase [Salmonella enterica subsp. enterica serovar Typhi str. CT18]
166	NC_004631	29144086	NP_807428.1	hypothetical protein t3806 [Salmonella enterica subsp. enterica serovar Typhi str. Ty2]
166	NC_006511	56415603	YP_152678.1	O-antigen ligase [Salmonella enterica subsp. enterica serovar Paratyphi A str. ATCC 9150]
166	NC_006905	62182206	YP_218623.1	hypothetical protein SC3636 [Salmonella enterica subsp. enterica serovar Choleraesuis str. SC-B67]
166	NC_010067	161505752	YP_001572864.1	hypothetical protein SARI_03928 [Salmonella enterica subsp. arizonae serovar 62:z4,z23:- str. RSK2980]
166	NC_010102	161616791	YP_001590756.1	hypothetical protein SPAB_04610 [Salmonella enterica subsp. enterica serovar Paratyphi B str. SPB7]
166	NC_011080	194443618	YP_002042963.1	O-antigen ligase [Salmonella enterica subsp. enterica serovar Newport str. SL254]
166	NC_011083	194450945	YP_002047744.1	O-antigen ligase [Salmonella enterica subsp. enterica serovar Heidelberg str. SL476]
166	NC_011094	194737936	YP_002116648.1	O-antigen ligase [Salmonella enterica subsp. enterica serovar Schwarzengrund str. CVM19633]
166	NC_011147	197364530	YP_002144167.1	O-antigen ligase [Salmonella enterica subsp. enterica serovar Paratyphi A str. AKU_12601]
166	NC_011149	197251849	YP_002148646.1	O-antigen ligase [Salmonella enterica subsp. enterica serovar Agona str. SL483]
166	NC_011205	198245607	YP_002217675.1	O-antigen ligase [Salmonella enterica subsp. enterica serovar Dublin str. CT_02021853]
166	NC_011274	205354684	YP_002228485.1	O-antigen ligase [Salmonella enterica subsp. enterica serovar Gallinarum str. 287/91]
166	NC_011294	207858950	YP_002245601.1	O-antigen ligase [Salmonella enterica subsp. enterica serovar Enteritidis str. P125109]
166	NC_012125	224585513	YP_002639312.1	O-antigen ligase [Salmonella enterica subsp. enterica serovar Paratyphi C strain RKS4594]
166	NC_016810	378701601	YP_005183559.1	O-antigen ligase [Salmonella enterica subsp. enterica serovar Typhimurium str. SL1344]
166	NC_016831	378957432	YP_005214919.1	O-antigen ligase [Salmonella enterica subsp. enterica serovar Gallinarum/pullorum str. RKS5078]
166	NC_016832	378961973	YP_005219459.1	O-antigen ligase [Salmonella enterica subsp. enterica serovar Typhi str. P-stx-12]
166	NC_016854	378447082	YP_005234714.1	O-antigen ligase [Salmonella enterica subsp. enterica serovar Typhimurium str. D23580]
166	NC_016856	378452594	YP_005239954.1	O-antigen ligase [Salmonella enterica subsp. enterica serovar Typhimurium str. 14028S]
166	NC_016857	379702974	YP_005244702.1	O-antigen ligase [Salmonella enterica subsp. enterica serovar Typhimurium str. ST4/74]
166	NC_016860	378986310	YP_005249466.1	O-antigen ligase [Salmonella enterica subsp. enterica serovar Typhimurium str. T000240]
166	NC_016863	378991015	YP_005254179.1	O-antigen ligase [Salmonella enterica subsp. enterica serovar Typhimurium str. UK-1]
166	NC_017046	383498348	YP_005399037.1	O-antigen ligase [Salmonella enterica subsp. enterica serovar Typhimurium str. 798]
166	NC_017623	386593386	YP_006089786.1	Oligosaccharide repeat unit polymerase Wzy, O-antigen ligase [Salmonella enterica subsp. enterica serovar Heidelberg str. B182]
166	NC_020307	452122493	YP_007472741.1	O-antigen ligase RfaL [Salmonella enterica subsp. enterica serovar Javiana str. CFSAN001992]
166	NC_021151	482906277	YP_007904837.1	O-antigen ligase RfaL [Salmonella enterica subsp. enterica serovar Typhimurium str. U288]
166	NC_021176	488656245	YP_007928048.1	hypothetical protein TY21A_19335 [Salmonella enterica subsp. enterica serovar Typhi str. Ty21a]
166	NC_021810	525814985	YP_008245003.1	O-antigen ligase RfaL [Salmonella enterica subsp. enterica serovar Heidelberg str. 41578]
166	NC_021812	525828581	YP_008251475.1	ligase [Salmonella enterica subsp. enterica serovar Heidelberg str. CFSAN002069]
166	NC_021814	525840201	YP_008257673.1	ligase [Salmonella enterica subsp. enterica serovar Typhimurium var. 5- str. CFSAN001921]
166	NC_021818	525859360	YP_008262957.1	ligase [Salmonella enterica subsp. enterica serovar Cubana str. CFSAN002050]
166	NC_021820	526218394	YP_008263544.1	ligase [Salmonella enterica subsp. enterica serovar 4,[5],12:i:- str. 08-1736]
166	NC_021844	525945667	YP_008306630.1	ligase [Salmonella enterica subsp. enterica serovar Bareilly str. CFSAN000189]
166	NC_021902	528816883	YP_008358086.1	O-antigen ligase [Salmonella enterica subsp. enterica serovar Newport str. USMARC-S3124.1]
166	NC_021984	529221489	YP_008383022.1	ligase [Salmonella enterica subsp. enterica serovar Pullorum str. S06004]
166	NC_022221	537439001	YP_008483378.1	O-antigen ligase [Salmonella enterica subsp. enterica serovar Gallinarum/pullorum str. CDC1983-67]
166	NC_022241	538364323	YP_008507608.1	O-antigen ligase [Salmonella enterica subsp. enterica serovar Bovismorbificans str. 3114]
166	NC_022525	549480995	YP_008615349.1	ligase [Salmonella enterica subsp. enterica serovar Thompson str. RM6836]
166	NC_022544	549726266	YP_008646456.1	O-antigen ligase [Salmonella enterica subsp. enterica serovar Typhimurium str. DT2]
166	NC_022569	550903056	YP_008672148.1	O-antigen ligase [Salmonella enterica subsp. enterica serovar Typhimurium str. DT104]
174	NC_003197	16765637	NP_461252.1	menaquinone-specific isochorismate synthase [Salmonella enterica subsp. enterica serovar Typhimurium str. LT2]
174	NC_003198	16761236	NP_456853.1	isochorismate synthase [Salmonella enterica subsp. enterica serovar Typhi str. CT18]
174	NC_004631	29141068	NP_804410.1	menaquinone-specific isochorismate synthase [Salmonella enterica subsp. enterica serovar Typhi str. Ty2]
174	NC_006511	56412792	YP_149867.1	isochorismate synthase [Salmonella enterica subsp. enterica serovar Paratyphi A str. ATCC 9150]
174	NC_006905	62180880	YP_217297.1	menaquinone-specific isochorismate synthase [Salmonella enterica subsp. enterica serovar Choleraesuis str. SC-B67]
174	NC_010067	161502545	YP_001569657.1	menaquinone-specific isochorismate synthase [Salmonella enterica subsp. arizonae serovar 62:z4,z23:- str. RSK2980]
174	NC_010102	161612965	YP_001586930.1	menaquinone-specific isochorismate synthase [Salmonella enterica subsp. enterica serovar Paratyphi B str. SPB7]
174	NC_011080	194443736	YP_002041571.1	menaquinone-specific isochorismate synthase [Salmonella enterica subsp. enterica serovar Newport str. SL254]
174	NC_011083	194450238	YP_002046364.1	menaquinone-specific isochorismate synthase [Salmonella enterica subsp. enterica serovar Heidelberg str. SL476]
174	NC_011094	194737064	YP_002115380.1	menaquinone-specific isochorismate synthase [Salmonella enterica subsp. enterica serovar Schwarzengrund str. CVM19633]
174	NC_011147	197361726	YP_002141362.1	isochorismate synthase [Salmonella enterica subsp. enterica serovar Paratyphi A str. AKU_12601]
174	NC_011149	197247503	YP_002147266.1	menaquinone-specific isochorismate synthase [Salmonella enterica subsp. enterica serovar Agona str. SL483]
174	NC_011205	198242217	YP_002216378.1	menaquinone-specific isochorismate synthase [Salmonella enterica subsp. enterica serovar Dublin str. CT_02021853]
174	NC_011274	205353425	YP_002227226.1	isochorismate synthase [Salmonella enterica subsp. enterica serovar Gallinarum str. 287/91]
174	NC_011294	207857728	YP_002244379.1	isochorismate synthase [Salmonella enterica subsp. enterica serovar Enteritidis str. P125109]
174	NC_012125	224583205	YP_002637003.1	menaquinone-specific isochorismate synthase [Salmonella enterica subsp. enterica serovar Paratyphi C strain RKS4594]
174	NC_016810	378700220	YP_005182177.1	isochorismate synthase [Salmonella enterica subsp. enterica serovar Typhimurium str. SL1344]
174	NC_016831	378954342	YP_005211829.1	isochorismate synthase [Salmonella enterica subsp. enterica serovar Gallinarum/pullorum str. RKS5078]
174	NC_016832	378958701	YP_005216187.1	Menaquinone-specific isochorismate synthase [Salmonella enterica subsp. enterica serovar Typhi str. P-stx-12]
174	NC_016854	378445739	YP_005233371.1	isochorismate synthase [Salmonella enterica subsp. enterica serovar Typhimurium str. D23580]
174	NC_016856	378451025	YP_005238384.1	menaquinone-specific isochorismate synthase [Salmonella enterica subsp. enterica serovar Typhimurium str. 14028S]
174	NC_016857	379701541	YP_005243269.1	menaquinone-specific isochorismate synthase [Salmonella enterica subsp. enterica serovar Typhimurium str. ST4/74]
174	NC_016860	378984872	YP_005248027.1	menaquinone-specific isochorismate synthase [Salmonella enterica subsp. enterica serovar Typhimurium str. T000240]
174	NC_016863	378989696	YP_005252860.1	menaquinone-specific isochorismate synthase [Salmonella enterica subsp. enterica serovar Typhimurium str. UK-1]
174	NC_017046	383497011	YP_005397700.1	isochorismate synthase [Salmonella enterica subsp. enterica serovar Typhimurium str. 798]
174	NC_017623	386592119	YP_006088519.1	Menaquinone-specific isochorismate synthase [Salmonella enterica subsp. enterica serovar Heidelberg str. B182]
174	NC_020307	452123863	YP_007474111.1	menaquinone-specific isochorismate synthase [Salmonella enterica subsp. enterica serovar Javiana str. CFSAN001992]
174	NC_021151	482904124	YP_007902684.1	menaquinone-specific isochorismate synthase [Salmonella enterica subsp. enterica serovar Typhimurium str. U288]
174	NC_021176	488653102	YP_007924905.1	menaquinone-specific isochorismate synthase [Salmonella enterica subsp. enterica serovar Typhi str. Ty21a]
174	NC_021810	525818199	YP_008248217.1	menaquinone-specific isochorismate synthase [Salmonella enterica subsp. enterica serovar Heidelberg str. 41578]
174	NC_021812	525829650	YP_008252799.1	isochorismate synthase [Salmonella enterica subsp. enterica serovar Heidelberg str. CFSAN002069]
174	NC_021814	525837592	YP_008254439.1	isochorismate synthase [Salmonella enterica subsp. enterica serovar Typhimurium var. 5- str. CFSAN001921]
174	NC_021818	525858311	YP_008261587.1	isochorismate synthase [Salmonella enterica subsp. enterica serovar Cubana str. CFSAN002050]
174	NC_021820	526220862	YP_008266556.1	isochorismate synthase [Salmonella enterica subsp. enterica serovar 4,[5],12:i:- str. 08-1736]
174	NC_021844	525946717	YP_008307937.1	isochorismate synthase [Salmonella enterica subsp. enterica serovar Bareilly str. CFSAN000189]
174	NC_021902	528820128	YP_008361331.1	Menaquinone-specific isochorismate synthase [Salmonella enterica subsp. enterica serovar Newport str. USMARC-S3124.1]
174	NC_021984	529219193	YP_008380086.1	isochorismate synthase [Salmonella enterica subsp. enterica serovar Pullorum str. S06004]
174	NC_022221	537435911	YP_008480288.1	isochorismate synthase [Salmonella enterica subsp. enterica serovar Gallinarum/pullorum str. CDC1983-67]
174	NC_022241	538362923	YP_008506208.1	menaquinone-specific isochorismate synthase [Salmonella enterica subsp. enterica serovar Bovismorbificans str. 3114]
174	NC_022525	549479952	YP_008614080.1	isochorismate synthase [Salmonella enterica subsp. enterica serovar Thompson str. RM6836]
174	NC_022544	549724966	YP_008645156.1	isochorismate synthase [Salmonella enterica subsp. enterica serovar Typhimurium str. DT2]
174	NC_022569	550901746	YP_008670838.1	isochorismate synthase [Salmonella enterica subsp. enterica serovar Typhimurium str. DT104]
177	NC_003197	16763516	NP_459131.1	UDP-N-acetylmuramoyl-L-alanyl-D-glutamate synthetase [Salmonella enterica subsp. enterica serovar Typhimurium str. LT2]
177	NC_003198	16759121	NP_454738.1	UDP-N-acetylmuramoyl-L-alanine:D-glutamate ligase [Salmonella enterica subsp. enterica serovar Typhi str. CT18]
177	NC_004631	29140671	NP_804013.1	UDP-N-acetylmuramoyl-L-alanyl-D-glutamate synthetase [Salmonella enterica subsp. enterica serovar Typhi str. Ty2]
177	NC_006511	56412398	YP_149473.1	UDP-N-acetylmuramoyl-L-alanine:D-glutamate ligase [Salmonella enterica subsp. enterica serovar Paratyphi A str. ATCC 9150]
177	NC_006905	62178693	YP_215110.1	UDP-N-acetylmuramoyl-L-alanyl-D-glutamate synthetase [Salmonella enterica subsp. enterica serovar Choleraesuis str. SC-B67]
177	NC_010067	161504752	YP_001571864.1	UDP-N-acetylmuramoyl-L-alanyl-D-glutamate synthetase [Salmonella enterica subsp. arizonae serovar 62:z4,z23:- str. RSK2980]
177	NC_010102	161612470	YP_001586435.1	UDP-N-acetylmuramoyl-L-alanyl-D-glutamate synthetase [Salmonella enterica subsp. enterica serovar Paratyphi B str. SPB7]
177	NC_011080	194442341	YP_002039358.1	UDP-N-acetylmuramoyl-L-alanyl-D-glutamate synthetase [Salmonella enterica subsp. enterica serovar Newport str. SL254]
177	NC_011083	194448105	YP_002044096.1	UDP-N-acetylmuramoyl-L-alanyl-D-glutamate synthetase [Salmonella enterica subsp. enterica serovar Heidelberg str. SL476]
177	NC_011094	194736856	YP_002113144.1	UDP-N-acetylmuramoyl-L-alanyl-D-glutamate synthetase [Salmonella enterica subsp. enterica serovar Schwarzengrund str. CVM19633]
177	NC_011147	197361334	YP_002140969.1	UDP-N-acetylmuramoyl-L-alanyl-D-glutamate synthetase [Salmonella enterica subsp. enterica serovar Paratyphi A str. AKU_12601]
177	NC_011149	197248149	YP_002145112.1	UDP-N-acetylmuramoyl-L-alanyl-D-glutamate synthetase [Salmonella enterica subsp. enterica serovar Agona str. SL483]
177	NC_011205	198243206	YP_002214078.1	UDP-N-acetylmuramoyl-L-alanyl-D-glutamate synthetase [Salmonella enterica subsp. enterica serovar Dublin str. CT_02021853]
177	NC_011274	205351465	YP_002225266.1	UDP-N-acetylmuramoyl-L-alanyl-D-glutamate synthetase [Salmonella enterica subsp. enterica serovar Gallinarum str. 287/91]
177	NC_011294	207855640	YP_002242291.1	UDP-N-acetylmuramoyl-L-alanyl-D-glutamate synthetase [Salmonella enterica subsp. enterica serovar Enteritidis str. P125109]
177	NC_012125	224581969	YP_002635767.1	UDP-N-acetylmuramoyl-L-alanyl-D-glutamate synthetase [Salmonella enterica subsp. enterica serovar Paratyphi C strain RKS4594]
177	NC_016810	378698106	YP_005180063.1	UDP-N-acetylmuramoylalanine--D-glutamate ligase [Salmonella enterica subsp. enterica serovar Typhimurium str. SL1344]
177	NC_016831	378953930	YP_005211417.1	UDP-N-acetylmuramoyl-L-alanine:D-glutamate ligase [Salmonella enterica subsp. enterica serovar Gallinarum/pullorum str. RKS5078]
177	NC_016832	378958273	YP_005215759.1	UDP-N-acetylmuramoylalanine--D-glutamate ligase [Salmonella enterica subsp. enterica serovar Typhi str. P-stx-12]
177	NC_016854	378443580	YP_005231212.1	D-glutamic acid adding enzyme [Salmonella enterica subsp. enterica serovar Typhimurium str. D23580]
177	NC_016856	378448426	YP_005235785.1	UDP-N-acetylmuramoyl-L-alanyl-D-glutamate synthetase [Salmonella enterica subsp. enterica serovar Typhimurium str. 14028S]
177	NC_016857	379699347	YP_005241075.1	UDP-N-acetylmuramoyl-L-alanyl-D-glutamate synthetase [Salmonella enterica subsp. enterica serovar Typhimurium str. ST4/74]
177	NC_016860	378982667	YP_005245822.1	UDP-N-acetylmuramoyl-L-alanyl-D-glutamate synthetase [Salmonella enterica subsp. enterica serovar Typhimurium str. T000240]
177	NC_016863	378987532	YP_005250696.1	UDP-N-acetylmuramoyl-L-alanyl-D-glutamate synthetase [Salmonella enterica subsp. enterica serovar Typhimurium str. UK-1]
177	NC_017046	383494948	YP_005395637.1	UDP-N-acetylmuramoylalanine--D-glutamate ligase [Salmonella enterica subsp. enterica serovar Typhimurium str. 798]
177	NC_017623	386590005	YP_006086405.1	UDP-N-acetylmuramoylalanine--D-glutamate ligase [Salmonella enterica subsp. enterica serovar Heidelberg str. B182]
177	NC_020307	452121569	YP_007471817.1	UDP-N-acetylmuramoyl-L-alanyl-D-glutamate synthetase [Salmonella enterica subsp. enterica serovar Javiana str. CFSAN001992]
177	NC_021151	482902675	YP_007901235.1	UDP-N-acetylmuramoyl-L-alanyl-D-glutamate synthetase [Salmonella enterica subsp. enterica serovar Typhimurium str. U288]
177	NC_021176	488652691	YP_007924494.1	UDP-N-acetylmuramoyl-L-alanyl-D-glutamate synthetase [Salmonella enterica subsp. enterica serovar Typhi str. Ty21a]
177	NC_021810	525815983	YP_008246001.1	UDP-N-acetylmuramoyl-L-alanyl-D-glutamate synthetase [Salmonella enterica subsp. enterica serovar Heidelberg str. 41578]
177	NC_021812	525830400	YP_008250546.1	UDP-N-acetylmuramoyl-L-alanyl-D-glutamate synthetase [Salmonella enterica subsp. enterica serovar Heidelberg str. CFSAN002069]
177	NC_021814	525841107	YP_008256697.1	UDP-N-acetylmuramoyl-L-alanyl-D-glutamate synthetase [Salmonella enterica subsp. enterica serovar Typhimurium var. 5- str. CFSAN001921]
177	NC_021818	525859613	YP_008259358.1	UDP-N-acetylmuramoyl-L-alanyl-D-glutamate synthetase [Salmonella enterica subsp. enterica serovar Cubana str. CFSAN002050]
177	NC_021820	526221950	YP_008264385.1	UDP-N-acetylmuramoyl-L-alanyl-D-glutamate synthetase [Salmonella enterica subsp. enterica serovar 4,[5],12:i:- str. 08-1736]
177	NC_021844	525949724	YP_008310035.1	UDP-N-acetylmuramoyl-L-alanyl-D-glutamate synthetase [Salmonella enterica subsp. enterica serovar Bareilly str. CFSAN000189]
177	NC_021902	528817825	YP_008359028.1	UDP-N-acetylmuramoylalanine--D-glutamate ligase [Salmonella enterica subsp. enterica serovar Newport str. USMARC-S3124.1]
177	NC_021984	529221985	YP_008379714.1	UDP-N-acetylmuramoyl-L-alanyl-D-glutamate synthetase [Salmonella enterica subsp. enterica serovar Pullorum str. S06004]
177	NC_022221	537435496	YP_008479873.1	UDP-N-acetylmuramoyl-L-alanine:D-glutamate ligase [Salmonella enterica subsp. enterica serovar Gallinarum/pullorum str. CDC1983-67]
177	NC_022241	538360697	YP_008503982.1	UDP-N-acetylmuramoyl-L-alanine:D-glutamate ligase [Salmonella enterica subsp. enterica serovar Bovismorbificans str. 3114]
177	NC_022525	549481680	YP_008611959.1	UDP-N-acetylmuramoyl-L-alanyl-D-glutamate synthetase [Salmonella enterica subsp. enterica serovar Thompson str. RM6836]
177	NC_022544	549722851	YP_008643041.1	UDP-N-acetylmuramoylalanine--D-glutamate ligase [Salmonella enterica subsp. enterica serovar Typhimurium str. DT2]
177	NC_022569	550899551	YP_008668643.1	UDP-N-acetylmuramoylalanine--D-glutamate ligase [Salmonella enterica subsp. enterica serovar Typhimurium str. DT104]
179	NC_003197	16764817	NP_460432.1	sensor protein RstB [Salmonella enterica subsp. enterica serovar Typhimurium str. LT2]
179	NC_003198	16760444	NP_456061.1	two component sensor kinase [Salmonella enterica subsp. enterica serovar Typhi str. CT18]
179	NC_004631	409994508	NP_805138.2	sensor protein RstB [Salmonella enterica subsp. enterica serovar Typhi str. Ty2]
179	NC_006511	56413563	YP_150638.1	two component sensor kinase [Salmonella enterica subsp. enterica serovar Paratyphi A str. ATCC 9150]
179	NC_006905	62180058	YP_216475.1	sensor protein RstB [Salmonella enterica subsp. enterica serovar Choleraesuis str. SC-B67]
179	NC_010067	161503432	YP_001570544.1	sensor protein RstB [Salmonella enterica subsp. arizonae serovar 62:z4,z23:- str. RSK2980]
179	NC_010102	161614109	YP_001588074.1	sensor protein RstB [Salmonella enterica subsp. enterica serovar Paratyphi B str. SPB7]
179	NC_011080	194442422	YP_002040718.1	sensor protein RstB [Salmonella enterica subsp. enterica serovar Newport str. SL254]
179	NC_011083	194448686	YP_002045507.1	sensor protein RstB [Salmonella enterica subsp. enterica serovar Heidelberg str. SL476]
179	NC_011094	194738016	YP_002114485.1	sensor protein RstB [Salmonella enterica subsp. enterica serovar Schwarzengrund str. CVM19633]
179	NC_011147	197362487	YP_002142124.1	sensor protein RstB [Salmonella enterica subsp. enterica serovar Paratyphi A str. AKU_12601]
179	NC_011149	197251835	YP_002146574.1	sensor protein RstB [Salmonella enterica subsp. enterica serovar Agona str. SL483]
179	NC_011205	198245106	YP_002215666.1	sensor protein RstB [Salmonella enterica subsp. enterica serovar Dublin str. CT_02021853]
179	NC_011274	205352818	YP_002226619.1	sensor protein RstB [Salmonella enterica subsp. enterica serovar Gallinarum str. 287/91]
179	NC_011294	207857027	YP_002243678.1	sensor protein RstB [Salmonella enterica subsp. enterica serovar Enteritidis str. P125109]
179	NC_012125	224584021	YP_002637819.1	sensor protein RstB [Salmonella enterica subsp. enterica serovar Paratyphi C strain RKS4594]
179	NC_016810	378699354	YP_005181311.1	two component sensor kinase [Salmonella enterica subsp. enterica serovar Typhimurium str. SL1344]
179	NC_016831	378955006	YP_005212493.1	two component sensor kinase [Salmonella enterica subsp. enterica serovar Gallinarum/pullorum str. RKS5078]
179	NC_016832	378959497	YP_005216983.1	hypothetical protein STBHUCCB_14250 [Salmonella enterica subsp. enterica serovar Typhi str. P-stx-12]
179	NC_016854	378444894	YP_005232526.1	two component sensor kinase [Salmonella enterica subsp. enterica serovar Typhimurium str. D23580]
179	NC_016856	378449985	YP_005237344.1	sensor protein RstB [Salmonella enterica subsp. enterica serovar Typhimurium str. 14028S]
179	NC_016857	379700640	YP_005242368.1	sensor protein RstB [Salmonella enterica subsp. enterica serovar Typhimurium str. ST4/74]
179	NC_016860	378984025	YP_005247180.1	sensor kinase RstB [Salmonella enterica subsp. enterica serovar Typhimurium str. T000240]
179	NC_016863	378988807	YP_005251971.1	sensor protein RstB [Salmonella enterica subsp. enterica serovar Typhimurium str. UK-1]
179	NC_017046	383496173	YP_005396862.1	two component sensor kinase [Salmonella enterica subsp. enterica serovar Typhimurium str. 798]
179	NC_017623	386591316	YP_006087716.1	Sensory histidine kinase in two-component regulatory system with RstA [Salmonella enterica subsp. enterica serovar Heidelberg str. B182]
179	NC_020307	452120355	YP_007470603.1	sensor protein RstB [Salmonella enterica subsp. enterica serovar Javiana str. CFSAN001992]
179	NC_021151	482903278	YP_007901838.1	sensor protein RstB [Salmonella enterica subsp. enterica serovar Typhimurium str. U288]
179	NC_021176	488653859	YP_007925662.1	sensor protein RstB [Salmonella enterica subsp. enterica serovar Typhi str. Ty21a]
179	NC_021810	525817356	YP_008247374.1	sensor protein RstB [Salmonella enterica subsp. enterica serovar Heidelberg str. 41578]
179	NC_021812	525826741	YP_008249192.1	sensor protein RstB [Salmonella enterica subsp. enterica serovar Heidelberg str. CFSAN002069]
179	NC_021814	525838324	YP_008255334.1	sensor protein RstB [Salmonella enterica subsp. enterica serovar Typhimurium var. 5- str. CFSAN001921]
179	NC_021818	525857575	YP_008260659.1	sensor protein RstB [Salmonella enterica subsp. enterica serovar Cubana str. CFSAN002050]
179	NC_021820	526220132	YP_008265668.1	sensor protein RstB [Salmonella enterica subsp. enterica serovar 4,[5],12:i:- str. 08-1736]
179	NC_021844	525947386	YP_008308752.1	sensor protein RstB [Salmonella enterica subsp. enterica serovar Bareilly str. CFSAN000189]
179	NC_021902	528819252	YP_008360455.1	Sensor protein RstB [Salmonella enterica subsp. enterica serovar Newport str. USMARC-S3124.1]
179	NC_021984	529219664	YP_008380696.1	sensor protein RstB [Salmonella enterica subsp. enterica serovar Pullorum str. S06004]
179	NC_022221	537436579	YP_008480956.1	two component sensor kinase [Salmonella enterica subsp. enterica serovar Gallinarum/pullorum str. CDC1983-67]
179	NC_022241	538362050	YP_008505335.1	sensor protein RstB [Salmonella enterica subsp. enterica serovar Bovismorbificans str. 3114]
179	NC_022525	549479282	YP_008613253.1	sensor protein RstB [Salmonella enterica subsp. enterica serovar Thompson str. RM6836]
179	NC_022544	549724103	YP_008644293.1	two component sensor kinase [Salmonella enterica subsp. enterica serovar Typhimurium str. DT2]
179	NC_022569	550900834	YP_008669926.1	two component sensor kinase [Salmonella enterica subsp. enterica serovar Typhimurium str. DT104]
186	NC_003197	16763778	NP_459393.1	phosphate regulon sensor protein [Salmonella enterica subsp. enterica serovar Typhimurium str. LT2]
186	NC_003198	16759375	NP_454992.1	phosphate regulon sensor protein PhoR [Salmonella enterica subsp. enterica serovar Typhi str. CT18]
186	NC_004631	29142854	NP_806196.1	phosphate regulon sensor protein [Salmonella enterica subsp. enterica serovar Typhi str. Ty2]
186	NC_006511	56414447	YP_151522.1	phosphate regulon sensor protein PhoR [Salmonella enterica subsp. enterica serovar Paratyphi A str. ATCC 9150]
186	NC_006905	62179009	YP_215426.1	phosphate regulon sensor protein [Salmonella enterica subsp. enterica serovar Choleraesuis str. SC-B67]
186	NC_010067	161504417	YP_001571529.1	phosphate regulon sensor protein [Salmonella enterica subsp. arizonae serovar 62:z4,z23:- str. RSK2980]
186	NC_010102	161615420	YP_001589384.1	phosphate regulon sensor protein [Salmonella enterica subsp. enterica serovar Paratyphi B str. SPB7]
186	NC_011080	194442327	YP_002039638.1	phosphate regulon sensor protein [Salmonella enterica subsp. enterica serovar Newport str. SL254]
186	NC_011083	194448403	YP_002044431.1	phosphate regulon sensor protein [Salmonella enterica subsp. enterica serovar Heidelberg str. SL476]
186	NC_011094	194737079	YP_002113429.1	phosphate regulon sensor protein [Salmonella enterica subsp. enterica serovar Schwarzengrund str. CVM19633]
186	NC_011147	197363368	YP_002143005.1	phosphate regulon sensor protein [Salmonella enterica subsp. enterica serovar Paratyphi A str. AKU_12601]
186	NC_011149	197250186	YP_002145380.1	phosphate regulon sensor protein [Salmonella enterica subsp. enterica serovar Agona str. SL483]
186	NC_011205	198243538	YP_002214352.1	phosphate regulon sensor protein [Salmonella enterica subsp. enterica serovar Dublin str. CT_02021853]
186	NC_011274	205351710	YP_002225511.1	phosphate regulon sensor protein [Salmonella enterica subsp. enterica serovar Gallinarum str. 287/91]
186	NC_011294	207855880	YP_002242531.1	phosphate regulon sensor protein [Salmonella enterica subsp. enterica serovar Enteritidis str. P125109]
186	NC_012125	224582235	YP_002636033.1	phosphate regulon sensor protein [Salmonella enterica subsp. enterica serovar Paratyphi C strain RKS4594]
186	NC_016810	378698362	YP_005180319.1	phosphate regulon sensor protein PhoR [Salmonella enterica subsp. enterica serovar Typhimurium str. SL1344]
186	NC_016831	378956218	YP_005213705.1	phosphate regulon sensor protein PhoR [Salmonella enterica subsp. enterica serovar Gallinarum/pullorum str. RKS5078]
186	NC_016832	378960639	YP_005218125.1	Phosphate regulon sensor protein phoR [Salmonella enterica subsp. enterica serovar Typhi str. P-stx-12]
186	NC_016854	378443902	YP_005231534.1	phosphate regulon sensor protein PhoR [Salmonella enterica subsp. enterica serovar Typhimurium str. D23580]
186	NC_016856	378448728	YP_005236087.1	phosphate regulon sensor protein [Salmonella enterica subsp. enterica serovar Typhimurium str. 14028S]
186	NC_016857	379699616	YP_005241344.1	phosphate regulon sensor protein [Salmonella enterica subsp. enterica serovar Typhimurium str. ST4/74]
186	NC_016860	378983003	YP_005246158.1	phosphate regulon sensor protein [Salmonella enterica subsp. enterica serovar Typhimurium str. T000240]
186	NC_016863	378987799	YP_005250963.1	phosphate regulon sensor protein [Salmonella enterica subsp. enterica serovar Typhimurium str. UK-1]
186	NC_017046	383495207	YP_005395896.1	phosphate regulon sensor protein PhoR [Salmonella enterica subsp. enterica serovar Typhimurium str. 798]
186	NC_017623	386590331	YP_006086731.1	phosphate regulon sensor protein PhoR [Salmonella enterica subsp. enterica serovar Heidelberg str. B182]
186	NC_020307	452121337	YP_007471585.1	phosphate regulon sensor protein [Salmonella enterica subsp. enterica serovar Javiana str. CFSAN001992]
186	NC_021151	482905015	YP_007903575.1	phosphate regulon sensor protein [Salmonella enterica subsp. enterica serovar Typhimurium str. U288]
186	NC_021176	488654960	YP_007926763.1	phosphate regulon sensor protein [Salmonella enterica subsp. enterica serovar Typhi str. Ty21a]
186	NC_021810	525816331	YP_008246349.1	phosphate regulon sensor protein [Salmonella enterica subsp. enterica serovar Heidelberg str. 41578]
186	NC_021812	525827569	YP_008250208.1	phosphate regulon sensor protein [Salmonella enterica subsp. enterica serovar Heidelberg str. CFSAN002069]
186	NC_021814	525839144	YP_008256361.1	phosphate regulon sensor protein [Salmonella enterica subsp. enterica serovar Typhimurium var. 5- str. CFSAN001921]
186	NC_021818	525856765	YP_008259651.1	phosphate regulon sensor protein [Salmonella enterica subsp. enterica serovar Cubana str. CFSAN002050]
186	NC_021820	526219300	YP_008264650.1	phosphate regulon sensor protein [Salmonella enterica subsp. enterica serovar 4,[5],12:i:- str. 08-1736]
186	NC_021844	525948211	YP_008309755.1	phosphate regulon sensor protein [Salmonella enterica subsp. enterica serovar Bareilly str. CFSAN000189]
186	NC_021902	528818111	YP_008359314.1	Phosphate regulon sensor protein phoR [Salmonella enterica subsp. enterica serovar Newport str. USMARC-S3124.1]
186	NC_021984	529220505	YP_008381772.1	phosphate regulon sensor protein [Salmonella enterica subsp. enterica serovar Pullorum str. S06004]
186	NC_022221	537437786	YP_008482163.1	phosphate regulon sensor protein PhoR [Salmonella enterica subsp. enterica serovar Gallinarum/pullorum str. CDC1983-67]
186	NC_022241	538360950	YP_008504235.1	phosphate regulon sensor protein PhoR [Salmonella enterica subsp. enterica serovar Bovismorbificans str. 3114]
186	NC_022525	549478461	YP_008612249.1	phosphate regulon sensor protein [Salmonella enterica subsp. enterica serovar Thompson str. RM6836]
186	NC_022544	549723112	YP_008643302.1	phosphate regulon sensor protein PhoR [Salmonella enterica subsp. enterica serovar Typhimurium str. DT2]
186	NC_022569	550899852	YP_008668944.1	phosphate regulon sensor protein PhoR [Salmonella enterica subsp. enterica serovar Typhimurium str. DT104]
190	NC_003197	16764014	NP_459629.1	D-alanyl-D-alanine carboxypeptidase [Salmonella enterica subsp. enterica serovar Typhimurium str. LT2]
190	NC_003198	16759596	NP_455213.1	D-alanine carboxypeptidase [Salmonella enterica subsp. enterica serovar Typhi str. CT18]
190	NC_004631	29142631	NP_805973.1	D-alanyl-D-alanine carboxypeptidase fraction A [Salmonella enterica subsp. enterica serovar Typhi str. Ty2]
190	NC_006511	56414228	YP_151303.1	D-alanine carboxypeptidase [Salmonella enterica subsp. enterica serovar Paratyphi A str. ATCC 9150]
190	NC_006905	62179236	YP_215653.1	D-alanyl-D-alanine carboxypeptidase [Salmonella enterica subsp. enterica serovar Choleraesuis str. SC-B67]
190	NC_010067	161504189	YP_001571301.1	D-alanyl-D-alanine carboxypeptidase fraction A [Salmonella enterica subsp. arizonae serovar 62:z4,z23:- str. RSK2980]
190	NC_010102	161615147	YP_001589112.1	D-alanyl-D-alanine carboxypeptidase fraction A [Salmonella enterica subsp. enterica serovar Paratyphi B str. SPB7]
190	NC_011080	194442745	YP_002039879.1	D-alanyl-D-alanine carboxypeptidase [Salmonella enterica subsp. enterica serovar Newport str. SL254]
190	NC_011083	194448720	YP_002044671.1	D-alanyl-D-alanine carboxypeptidase [Salmonella enterica subsp. enterica serovar Heidelberg str. SL476]
190	NC_011094	194736722	YP_002113755.1	D-alanyl-D-alanine carboxypeptidase [Salmonella enterica subsp. enterica serovar Schwarzengrund str. CVM19633]
190	NC_011147	197363151	YP_002142788.1	D-alanyl-D-alanine carboxypeptidase [Salmonella enterica subsp. enterica serovar Paratyphi A str. AKU_12601]
190	NC_011149	197250303	YP_002145612.1	D-alanyl-D-alanine carboxypeptidase [Salmonella enterica subsp. enterica serovar Agona str. SL483]
190	NC_011205	198245247	YP_002214626.1	D-alanyl-D-alanine carboxypeptidase fraction A [Salmonella enterica subsp. enterica serovar Dublin str. CT_02021853]
190	NC_011274	205351925	YP_002225726.1	D-alanyl-D-alanine carboxypeptidase fraction A [Salmonella enterica subsp. enterica serovar Gallinarum str. 287/91]
190	NC_011294	207856103	YP_002242754.1	D-alanyl-D-alanine carboxypeptidase [Salmonella enterica subsp. enterica serovar Enteritidis str. P125109]
190	NC_012125	224582473	YP_002636271.1	D-alanyl-D-alanine carboxypeptidase fraction A [Salmonella enterica subsp. enterica serovar Paratyphi C strain RKS4594]
190	NC_016810	378698590	YP_005180547.1	D-alanine carboxypeptidase [Salmonella enterica subsp. enterica serovar Typhimurium str. SL1344]
190	NC_016831	378955979	YP_005213466.1	D-alanine carboxypeptidase [Salmonella enterica subsp. enterica serovar Gallinarum/pullorum str. RKS5078]
190	NC_016832	378960397	YP_005217883.1	D-alanyl-D-alanine carboxypeptidase dacA [Salmonella enterica subsp. enterica serovar Typhi str. P-stx-12]
190	NC_016854	378444131	YP_005231763.1	D-alanine carboxypeptidase [Salmonella enterica subsp. enterica serovar Typhimurium str. D23580]
190	NC_016856	378448993	YP_005236352.1	D-alanyl-D-alanine carboxypeptidase [Salmonella enterica subsp. enterica serovar Typhimurium str. 14028S]
190	NC_016857	379699855	YP_005241583.1	D-alanyl-D-alanine carboxypeptidase [Salmonella enterica subsp. enterica serovar Typhimurium str. ST4/74]
190	NC_016860	378983240	YP_005246395.1	D-alanyl-D-alanine carboxypeptidase [Salmonella enterica subsp. enterica serovar Typhimurium str. T000240]
190	NC_016863	378988035	YP_005251199.1	D-alanyl-D-alanine carboxypeptidase [Salmonella enterica subsp. enterica serovar Typhimurium str. UK-1]
190	NC_017046	383495437	YP_005396126.1	D-alanine carboxypeptidase [Salmonella enterica subsp. enterica serovar Typhimurium str. 798]
190	NC_017623	386590565	YP_006086965.1	D-alanyl-D-alanine carboxypeptidase [Salmonella enterica subsp. enterica serovar Heidelberg str. B182]
190	NC_020307	452121131	YP_007471379.1	D-alanyl-D-alanine carboxypeptidase fraction A [Salmonella enterica subsp. enterica serovar Javiana str. CFSAN001992]
190	NC_021151	482904777	YP_007903337.1	D-alanyl-D-alanine carboxypeptidase fraction A [Salmonella enterica subsp. enterica serovar Typhimurium str. U288]
190	NC_021176	488654727	YP_007926530.1	D-alanyl-D-alanine carboxypeptidase fraction A [Salmonella enterica subsp. enterica serovar Typhi str. Ty21a]
190	NC_021810	525816570	YP_008246588.1	D-alanyl-D-alanine carboxypeptidase fraction A [Salmonella enterica subsp. enterica serovar Heidelberg str. 41578]
190	NC_021812	525827369	YP_008249972.1	D-alanyl-D-alanine carboxypeptidase [Salmonella enterica subsp. enterica serovar Heidelberg str. CFSAN002069]
190	NC_021814	525838944	YP_008256124.1	D-alanyl-D-alanine carboxypeptidase [Salmonella enterica subsp. enterica serovar Typhimurium var. 5- str. CFSAN001921]
190	NC_021818	525856969	YP_008259890.1	D-alanyl-D-alanine carboxypeptidase [Salmonella enterica subsp. enterica serovar Cubana str. CFSAN002050]
190	NC_021820	526219500	YP_008264886.1	D-alanyl-D-alanine carboxypeptidase [Salmonella enterica subsp. enterica serovar 4,[5],12:i:- str. 08-1736]
190	NC_021844	525948009	YP_008309515.1	D-alanyl-D-alanine carboxypeptidase [Salmonella enterica subsp. enterica serovar Bareilly str. CFSAN000189]
190	NC_021902	528818357	YP_008359560.1	D-alanyl-D-alanine carboxypeptidase dacA [Salmonella enterica subsp. enterica serovar Newport str. USMARC-S3124.1]
190	NC_021984	529220329	YP_008381563.1	D-alanyl-D-alanine carboxypeptidase [Salmonella enterica subsp. enterica serovar Pullorum str. S06004]
190	NC_022221	537437546	YP_008481923.1	D-alanine carboxypeptidase [Salmonella enterica subsp. enterica serovar Gallinarum/pullorum str. CDC1983-67]
190	NC_022241	538361182	YP_008504467.1	serine-type D-Ala-D-Ala carboxypeptidase [Salmonella enterica subsp. enterica serovar Bovismorbificans str. 3114]
190	NC_022525	549478658	YP_008612485.1	D-alanyl-D-alanine carboxypeptidase [Salmonella enterica subsp. enterica serovar Thompson str. RM6836]
190	NC_022544	549723339	YP_008643529.1	D-alanine carboxypeptidase [Salmonella enterica subsp. enterica serovar Typhimurium str. DT2]
190	NC_022569	550900070	YP_008669162.1	D-alanine carboxypeptidase [Salmonella enterica subsp. enterica serovar Typhimurium str. DT104]
192	NC_003197	16767009	NP_462624.1	3-deoxy-D-manno-octulosonic-acid transferase [Salmonella enterica subsp. enterica serovar Typhimurium str. LT2]
192	NC_003198	16762585	NP_458202.1	3-deoxy-D-manno-octulosonic-acid transferase [Salmonella enterica subsp. enterica serovar Typhi str. CT18]
192	NC_004631	29144074	NP_807416.1	3-deoxy-D-manno-octulosonic-acid transferase [Salmonella enterica subsp. enterica serovar Typhi str. Ty2]
192	NC_006511	56415614	YP_152689.1	3-deoxy-D-manno-octulosonic-acid transferase [Salmonella enterica subsp. enterica serovar Paratyphi A str. ATCC 9150]
192	NC_006905	62182217	YP_218634.1	3-deoxy-D-manno-octulosonic-acid transferase [Salmonella enterica subsp. enterica serovar Choleraesuis str. SC-B67]
192	NC_010067	161505740	YP_001572852.1	3-deoxy-D-manno-octulosonic-acid transferase [Salmonella enterica subsp. arizonae serovar 62:z4,z23:- str. RSK2980]
192	NC_010102	161616804	YP_001590769.1	3-deoxy-D-manno-octulosonic-acid transferase [Salmonella enterica subsp. enterica serovar Paratyphi B str. SPB7]
192	NC_011080	194443187	YP_002042974.1	3-deoxy-D-manno-octulosonic-acid transferase [Salmonella enterica subsp. enterica serovar Newport str. SL254]
192	NC_011083	194449972	YP_002047756.1	3-deoxy-D-manno-octulosonic-acid transferase [Salmonella enterica subsp. enterica serovar Heidelberg str. SL476]
192	NC_011094	194736070	YP_002116659.1	3-deoxy-D-manno-octulosonic-acid transferase [Salmonella enterica subsp. enterica serovar Schwarzengrund str. CVM19633]
192	NC_011147	449784995	YP_002144178.2	3-deoxy-D-manno-octulosonic-acid transferase [Salmonella enterica subsp. enterica serovar Paratyphi A str. AKU_12601]
192	NC_011149	197247988	YP_002148656.1	3-deoxy-D-manno-octulosonic-acid transferase [Salmonella enterica subsp. enterica serovar Agona str. SL483]
192	NC_011205	198245637	YP_002217685.1	3-deoxy-D-manno-octulosonic-acid transferase [Salmonella enterica subsp. enterica serovar Dublin str. CT_02021853]
192	NC_011274	205354674	YP_002228475.1	3-deoxy-D-manno-octulosonic-acid transferase [Salmonella enterica subsp. enterica serovar Gallinarum str. 287/91]
192	NC_011294	207858961	YP_002245612.1	3-deoxy-D-manno-octulosonic-acid transferase [Salmonella enterica subsp. enterica serovar Enteritidis str. P125109]
192	NC_012125	224585524	YP_002639323.1	3-deoxy-D-manno-octulosonic-acid transferase [Salmonella enterica subsp. enterica serovar Paratyphi C strain RKS4594]
192	NC_016810	378701612	YP_005183570.1	3-deoxy-D-manno-octulosonic-acid transferase [Salmonella enterica subsp. enterica serovar Typhimurium str. SL1344]
192	NC_016831	378957421	YP_005214908.1	3-deoxy-D-manno-octulosonic-acid transferase [Salmonella enterica subsp. enterica serovar Gallinarum/pullorum str. RKS5078]
192	NC_016832	378961960	YP_005219446.1	3-deoxy-D-manno-octulosonic-acid transferase [Salmonella enterica subsp. enterica serovar Typhi str. P-stx-12]
192	NC_016854	378447093	YP_005234725.1	3-deoxy-D-manno-octulosonic-acid transferase [Salmonella enterica subsp. enterica serovar Typhimurium str. D23580]
192	NC_016856	378452606	YP_005239966.1	3-deoxy-D-manno-octulosonic-acid transferase [Salmonella enterica subsp. enterica serovar Typhimurium str. 14028S]
192	NC_016857	379702985	YP_005244713.1	3-deoxy-D-manno-octulosonic-acid transferase [Salmonella enterica subsp. enterica serovar Typhimurium str. ST4/74]
192	NC_016860	378986321	YP_005249477.1	3-deoxy-D-manno-octulosonic-acid transferase [Salmonella enterica subsp. enterica serovar Typhimurium str. T000240]
192	NC_016863	378991026	YP_005254190.1	3-deoxy-D-manno-octulosonic-acid transferase [Salmonella enterica subsp. enterica serovar Typhimurium str. UK-1]
192	NC_017046	383498359	YP_005399048.1	3-deoxy-D-manno-octulosonic-acid transferase [Salmonella enterica subsp. enterica serovar Typhimurium str. 798]
192	NC_017623	386593396	YP_006089796.1	3-deoxy-D-manno-octulosonic-acid transferase [Salmonella enterica subsp. enterica serovar Heidelberg str. B182]
192	NC_020307	452122482	YP_007472730.1	3-deoxy-D-manno-octulosonic-acid transferase [Salmonella enterica subsp. enterica serovar Javiana str. CFSAN001992]
192	NC_021151	482906288	YP_007904848.1	3-deoxy-D-manno-octulosonic-acid transferase [Salmonella enterica subsp. enterica serovar Typhimurium str. U288]
192	NC_021176	488656234	YP_007928037.1	3-deoxy-D-manno-octulosonic-acid transferase [Salmonella enterica subsp. enterica serovar Typhi str. Ty21a]
192	NC_021810	525814996	YP_008245014.1	3-deoxy-D-manno-octulosonic-acid transferase [Salmonella enterica subsp. enterica serovar Heidelberg str. 41578]
192	NC_021812	525828572	YP_008251463.1	3-deoxy-D-manno-octulosonic acid transferase [Salmonella enterica subsp. enterica serovar Heidelberg str. CFSAN002069]
192	NC_021814	525840192	YP_008257662.1	3-deoxy-D-manno-octulosonic acid transferase [Salmonella enterica subsp. enterica serovar Typhimurium var. 5- str. CFSAN001921]
192	NC_021818	525859369	YP_008262968.1	3-deoxy-D-manno-octulosonic acid transferase [Salmonella enterica subsp. enterica serovar Cubana str. CFSAN002050]
192	NC_021820	526218385	YP_008263532.1	3-deoxy-D-manno-octulosonic acid transferase [Salmonella enterica subsp. enterica serovar 4,[5],12:i:- str. 08-1736]
192	NC_021844	525945658	YP_008306618.1	3-deoxy-D-manno-octulosonic acid transferase [Salmonella enterica subsp. enterica serovar Bareilly str. CFSAN000189]
192	NC_021902	528816871	YP_008358074.1	3-deoxy-manno-octulosonic acid transferase [Salmonella enterica subsp. enterica serovar Newport str. USMARC-S3124.1]
192	NC_021984	529221480	YP_008383011.1	3-deoxy-D-manno-octulosonic acid transferase [Salmonella enterica subsp. enterica serovar Pullorum str. S06004]
192	NC_022221	537438990	YP_008483367.1	3-deoxy-D-manno-octulosonic-acid transferase [Salmonella enterica subsp. enterica serovar Gallinarum/pullorum str. CDC1983-67]
192	NC_022241	538364334	YP_008507619.1	3-deoxy-D-manno-octulosonic-acid transferase (KDO transferase) [Salmonella enterica subsp. enterica serovar Bovismorbificans str. 3114]
192	NC_022525	549481004	YP_008615360.1	3-deoxy-D-manno-octulosonic acid transferase [Salmonella enterica subsp. enterica serovar Thompson str. RM6836]
192	NC_022544	549726277	YP_008646467.1	3-deoxy-D-manno-octulosonic-acid transferase [Salmonella enterica subsp. enterica serovar Typhimurium str. DT2]
192	NC_022569	550903067	YP_008672159.1	3-deoxy-D-manno-octulosonic-acid transferase [Salmonella enterica subsp. enterica serovar Typhimurium str. DT104]
194	NC_003197	16766602	NP_462217.1	UDP-N-acetylglucosamine 1-carboxyvinyltransferase [Salmonella enterica subsp. enterica serovar Typhimurium str. LT2]
194	NC_003198	16762069	NP_457686.1	UDP-N-acetylglucosamine 1-carboxyvinyltransferase [Salmonella enterica subsp. enterica serovar Typhi str. CT18]
194	NC_004631	29143558	NP_806900.1	UDP-N-acetylglucosamine 1-carboxyvinyltransferase [Salmonella enterica subsp. enterica serovar Typhi str. Ty2]
194	NC_006511	56415236	YP_152311.1	UDP-N-acetylglucosamine 1-carboxyvinyltransferase [Salmonella enterica subsp. enterica serovar Paratyphi A str. ATCC 9150]
194	NC_006905	62181815	YP_218232.1	UDP-N-acetylglucosamine 1-carboxyvinyltransferase [Salmonella enterica subsp. enterica serovar Choleraesuis str. SC-B67]
194	NC_010067	161506130	YP_001573242.1	UDP-N-acetylglucosamine 1-carboxyvinyltransferase [Salmonella enterica subsp. arizonae serovar 62:z4,z23:- str. RSK2980]
194	NC_010102	161616316	YP_001590281.1	UDP-N-acetylglucosamine 1-carboxyvinyltransferase [Salmonella enterica subsp. enterica serovar Paratyphi B str. SPB7]
194	NC_011080	194446526	YP_002042565.1	UDP-N-acetylglucosamine 1-carboxyvinyltransferase [Salmonella enterica subsp. enterica serovar Newport str. SL254]
194	NC_011083	194447912	YP_002047336.1	UDP-N-acetylglucosamine 1-carboxyvinyltransferase [Salmonella enterica subsp. enterica serovar Heidelberg str. SL476]
194	NC_011094	194736799	YP_002116257.1	UDP-N-acetylglucosamine 1-carboxyvinyltransferase [Salmonella enterica subsp. enterica serovar Schwarzengrund str. CVM19633]
194	NC_011147	197364166	YP_002143803.1	UDP-N-acetylglucosamine 1-carboxyvinyltransferase [Salmonella enterica subsp. enterica serovar Paratyphi A str. AKU_12601]
194	NC_011149	197248851	YP_002148232.1	UDP-N-acetylglucosamine 1-carboxyvinyltransferase [Salmonella enterica subsp. enterica serovar Agona str. SL483]
194	NC_011205	198243198	YP_002217278.1	UDP-N-acetylglucosamine 1-carboxyvinyltransferase [Salmonella enterica subsp. enterica serovar Dublin str. CT_02021853]
194	NC_011274	205354208	YP_002228009.1	UDP-N-acetylglucosamine 1-carboxyvinyltransferase [Salmonella enterica subsp. enterica serovar Gallinarum str. 287/91]
194	NC_011294	207858555	YP_002245206.1	UDP-N-acetylglucosamine 1-carboxyvinyltransferase [Salmonella enterica subsp. enterica serovar Enteritidis str. P125109]
194	NC_012125	224585104	YP_002638903.1	UDP-N-acetylglucosamine 1-carboxyvinyltransferase [Salmonella enterica subsp. enterica serovar Paratyphi C strain RKS4594]
194	NC_016810	378701207	YP_005183165.1	UDP-N-acetylglucosamine 1-carboxyvinyltransferase [Salmonella enterica subsp. enterica serovar Typhimurium str. SL1344]
194	NC_016831	378956921	YP_005214408.1	UDP-N-acetylglucosamine 1-carboxyvinyltransferase [Salmonella enterica subsp. enterica serovar Gallinarum/pullorum str. RKS5078]
194	NC_016832	378961400	YP_005218886.1	UDP-N-acetylglucosamine 1-carboxyvinyltransferase [Salmonella enterica subsp. enterica serovar Typhi str. P-stx-12]
194	NC_016854	378446693	YP_005234325.1	UDP-N-acetylglucosamine 1-carboxyvinyltransferase [Salmonella enterica subsp. enterica serovar Typhimurium str. D23580]
194	NC_016856	378452126	YP_005239486.1	UDP-N-acetylglucosamine 1-carboxyvinyltransferase [Salmonella enterica subsp. enterica serovar Typhimurium str. 14028S]
194	NC_016857	379702568	YP_005244296.1	UDP-N-acetylglucosamine 1-carboxyvinyltransferase [Salmonella enterica subsp. enterica serovar Typhimurium str. ST4/74]
194	NC_016860	378985905	YP_005249061.1	UDP-N-acetylglucosamine 1-carboxyvinyltransferase [Salmonella enterica subsp. enterica serovar Typhimurium str. T000240]
194	NC_016863	378990618	YP_005253782.1	UDP-N-acetylglucosamine 1-carboxyvinyltransferase [Salmonella enterica subsp. enterica serovar Typhimurium str. UK-1]
194	NC_017046	383497961	YP_005398650.1	UDP-N-acetylglucosamine 1-carboxyvinyltransferase [Salmonella enterica subsp. enterica serovar Typhimurium str. 798]
194	NC_017623	386592992	YP_006089392.1	UDP-N-acetylglucosamine 1-carboxyvinyltransferase [Salmonella enterica subsp. enterica serovar Heidelberg str. B182]
194	NC_020307	452122876	YP_007473124.1	UDP-N-acetylglucosamine 1-carboxyvinyltransferase [Salmonella enterica subsp. enterica serovar Javiana str. CFSAN001992]
194	NC_021151	482905876	YP_007904436.1	UDP-N-acetylglucosamine 1-carboxyvinyltransferase [Salmonella enterica subsp. enterica serovar Typhimurium str. U288]
194	NC_021176	488655681	YP_007927484.1	UDP-N-acetylglucosamine 1-carboxyvinyltransferase [Salmonella enterica subsp. enterica serovar Typhi str. Ty21a]
194	NC_021810	525814583	YP_008244601.1	UDP-N-acetylglucosamine 1-carboxyvinyltransferase [Salmonella enterica subsp. enterica serovar Heidelberg str. 41578]
194	NC_021812	525828918	YP_008251897.1	UDP-N-acetylglucosamine 1-carboxyvinyltransferase [Salmonella enterica subsp. enterica serovar Heidelberg str. CFSAN002069]
194	NC_021814	525836864	YP_008253511.1	UDP-N-acetylglucosamine 1-carboxyvinyltransferase [Salmonella enterica subsp. enterica serovar Typhimurium var. 5- str. CFSAN001921]
194	NC_021818	525859029	YP_008262562.1	UDP-N-acetylglucosamine 1-carboxyvinyltransferase [Salmonella enterica subsp. enterica serovar Cubana str. CFSAN002050]
194	NC_021820	526221640	YP_008267505.1	UDP-N-acetylglucosamine 1-carboxyvinyltransferase [Salmonella enterica subsp. enterica serovar 4,[5],12:i:- str. 08-1736]
194	NC_021844	525945997	YP_008307027.1	UDP-N-acetylglucosamine 1-carboxyvinyltransferase [Salmonella enterica subsp. enterica serovar Bareilly str. CFSAN000189]
194	NC_021902	528821142	YP_008362345.1	UDP-N-acetylglucosamine 1-carboxyvinyltransferase [Salmonella enterica subsp. enterica serovar Newport str. USMARC-S3124.1]
194	NC_021984	529221089	YP_008382543.1	UDP-N-acetylglucosamine 1-carboxyvinyltransferase [Salmonella enterica subsp. enterica serovar Pullorum str. S06004]
194	NC_022221	537438487	YP_008482864.1	UDP-N-acetylglucosamine 1-carboxyvinyltransferase [Salmonella enterica subsp. enterica serovar Gallinarum/pullorum str. CDC1983-67]
194	NC_022241	538363906	YP_008507191.1	UDP-N-acetylglucosamine 1-carboxyvinyltransferase [Salmonella enterica subsp. enterica serovar Bovismorbificans str. 3114]
194	NC_022525	549480666	YP_008614953.1	UDP-N-acetylglucosamine 1-carboxyvinyltransferase [Salmonella enterica subsp. enterica serovar Thompson str. RM6836]
194	NC_022544	549725867	YP_008646057.1	UDP-N-acetylglucosamine 1-carboxyvinyltransferase [Salmonella enterica subsp. enterica serovar Typhimurium str. DT2]
194	NC_022569	550902662	YP_008671754.1	UDP-N-acetylglucosamine 1-carboxyvinyltransferase [Salmonella enterica subsp. enterica serovar Typhimurium str. DT104]
205	NC_003197	16765664	NP_461279.1	acetate kinase [Salmonella enterica subsp. enterica serovar Typhimurium str. LT2]
205	NC_003198	16761262	NP_456879.1	acetate kinase [Salmonella enterica subsp. enterica serovar Typhi str. CT18]
205	NC_004631	29141042	NP_804384.1	acetate kinase [Salmonella enterica subsp. enterica serovar Typhi str. Ty2]
205	NC_006511	56412766	YP_149841.1	acetate kinase [Salmonella enterica subsp. enterica serovar Paratyphi A str. ATCC 9150]
205	NC_006905	62180908	YP_217325.1	acetate kinase [Salmonella enterica subsp. enterica serovar Choleraesuis str. SC-B67]
205	NC_010067	161502519	YP_001569631.1	acetate kinase [Salmonella enterica subsp. arizonae serovar 62:z4,z23:- str. RSK2980]
205	NC_010102	161612931	YP_001586896.1	acetate kinase [Salmonella enterica subsp. enterica serovar Paratyphi B str. SPB7]
205	NC_011080	194443104	YP_002041599.1	acetate kinase [Salmonella enterica subsp. enterica serovar Newport str. SL254]
205	NC_011083	194448091	YP_002046392.1	acetate kinase [Salmonella enterica subsp. enterica serovar Heidelberg str. SL476]
205	NC_011094	194736648	YP_002115407.1	acetate kinase [Salmonella enterica subsp. enterica serovar Schwarzengrund str. CVM19633]
205	NC_011147	449784916	YP_002141336.2	acetate kinase [Salmonella enterica subsp. enterica serovar Paratyphi A str. AKU_12601]
205	NC_011149	197247514	YP_002147297.1	acetate kinase [Salmonella enterica subsp. enterica serovar Agona str. SL483]
205	NC_011205	198244863	YP_002216408.1	acetate kinase [Salmonella enterica subsp. enterica serovar Dublin str. CT_02021853]
205	NC_011274	205353452	YP_002227253.1	acetate kinase [Salmonella enterica subsp. enterica serovar Gallinarum str. 287/91]
205	NC_011294	207857755	YP_002244406.1	acetate kinase [Salmonella enterica subsp. enterica serovar Enteritidis str. P125109]
205	NC_012125	224583175	YP_002636973.1	acetate kinase [Salmonella enterica subsp. enterica serovar Paratyphi C strain RKS4594]
205	NC_016810	378700247	YP_005182204.1	acetate kinase [Salmonella enterica subsp. enterica serovar Typhimurium str. SL1344]
205	NC_016831	378954315	YP_005211802.1	acetate kinase [Salmonella enterica subsp. enterica serovar Gallinarum/pullorum str. RKS5078]
205	NC_016832	378958673	YP_005216159.1	Acetate kinase [Salmonella enterica subsp. enterica serovar Typhi str. P-stx-12]
205	NC_016854	378445764	YP_005233396.1	Acetokinase [Salmonella enterica subsp. enterica serovar Typhimurium str. D23580]
205	NC_016856	378451058	YP_005238417.1	acetate kinase [Salmonella enterica subsp. enterica serovar Typhimurium str. 14028S]
205	NC_016857	379701569	YP_005243297.1	acetate kinase [Salmonella enterica subsp. enterica serovar Typhimurium str. ST4/74]
205	NC_016860	378984899	YP_005248054.1	acetate kinase [Salmonella enterica subsp. enterica serovar Typhimurium str. T000240]
205	NC_016863	378989723	YP_005252887.1	acetate kinase [Salmonella enterica subsp. enterica serovar Typhimurium str. UK-1]
205	NC_017046	383497038	YP_005397727.1	acetate kinase [Salmonella enterica subsp. enterica serovar Typhimurium str. 798]
205	NC_017623	386592145	YP_006088545.1	acetate kinase [Salmonella enterica subsp. enterica serovar Heidelberg str. B182]
205	NC_020307	452123838	YP_007474086.1	acetate kinase A/propionate kinase 2 [Salmonella enterica subsp. enterica serovar Javiana str. CFSAN001992]
205	NC_021151	482904152	YP_007902712.1	acetate kinase A/propionate kinase 2 [Salmonella enterica subsp. enterica serovar Typhimurium str. U288]
205	NC_021176	488653076	YP_007924879.1	acetate kinase [Salmonella enterica subsp. enterica serovar Typhi str. Ty21a]
205	NC_021810	525818224	YP_008248242.1	acetate kinase A/propionate kinase 2 [Salmonella enterica subsp. enterica serovar Heidelberg str. 41578]
205	NC_021812	525829630	YP_008252774.1	acetate kinase [Salmonella enterica subsp. enterica serovar Heidelberg str. CFSAN002069]
205	NC_021814	525837571	YP_008254412.1	acetate kinase [Salmonella enterica subsp. enterica serovar Typhimurium var. 5- str. CFSAN001921]
205	NC_021818	525858332	YP_008261614.1	acetate kinase [Salmonella enterica subsp. enterica serovar Cubana str. CFSAN002050]
205	NC_021820	526220883	YP_008266583.1	acetate kinase [Salmonella enterica subsp. enterica serovar 4,[5],12:i:- str. 08-1736]
205	NC_021844	525946697	YP_008307912.1	acetate kinase [Salmonella enterica subsp. enterica serovar Bareilly str. CFSAN000189]
205	NC_021902	528820156	YP_008361359.1	Acetate kinase [Salmonella enterica subsp. enterica serovar Newport str. USMARC-S3124.1]
205	NC_021984	529219172	YP_008380059.1	acetate kinase [Salmonella enterica subsp. enterica serovar Pullorum str. S06004]
205	NC_022221	537435884	YP_008480261.1	Acetate kinase [Salmonella enterica subsp. enterica serovar Gallinarum/pullorum str. CDC1983-67]
205	NC_022241	538362952	YP_008506237.1	acetate kinase [Salmonella enterica subsp. enterica serovar Bovismorbificans str. 3114]
205	NC_022525	549479973	YP_008614108.1	acetate kinase [Salmonella enterica subsp. enterica serovar Thompson str. RM6836]
205	NC_022544	549724993	YP_008645183.1	acetate kinase [Salmonella enterica subsp. enterica serovar Typhimurium str. DT2]
205	NC_022569	550901771	YP_008670863.1	Acetate kinase [Salmonella enterica subsp. enterica serovar Typhimurium str. DT104]
218	NC_003197	16763619	NP_459234.1	lipid-A-disaccharide synthase [Salmonella enterica subsp. enterica serovar Typhimurium str. LT2]
218	NC_003198	16759219	NP_454836.1	lipid-A-disaccharide synthase [Salmonella enterica subsp. enterica serovar Typhi str. CT18]
218	NC_004631	29140769	NP_804111.1	lipid-A-disaccharide synthase [Salmonella enterica subsp. enterica serovar Typhi str. Ty2]
218	NC_006511	56412502	YP_149577.1	lipid-A-disaccharide synthase [Salmonella enterica subsp. enterica serovar Paratyphi A str. ATCC 9150]
218	NC_006905	62178799	YP_215216.1	lipid-A-disaccharide synthase [Salmonella enterica subsp. enterica serovar Choleraesuis str. SC-B67]
218	NC_010067	161504652	YP_001571764.1	lipid-A-disaccharide synthase [Salmonella enterica subsp. arizonae serovar 62:z4,z23:- str. RSK2980]
218	NC_010102	161612602	YP_001586567.1	lipid-A-disaccharide synthase [Salmonella enterica subsp. enterica serovar Paratyphi B str. SPB7]
218	NC_011080	194443198	YP_002039469.1	lipid-A-disaccharide synthase [Salmonella enterica subsp. enterica serovar Newport str. SL254]
218	NC_011083	194450186	YP_002044219.1	lipid-A-disaccharide synthase [Salmonella enterica subsp. enterica serovar Heidelberg str. SL476]
218	NC_011094	194736847	YP_002113252.1	lipid-A-disaccharide synthase [Salmonella enterica subsp. enterica serovar Schwarzengrund str. CVM19633]
218	NC_011147	197361437	YP_002141073.1	lipid-A-disaccharide synthase [Salmonella enterica subsp. enterica serovar Paratyphi A str. AKU_12601]
218	NC_011149	197249560	YP_002145234.1	lipid-A-disaccharide synthase [Salmonella enterica subsp. enterica serovar Agona str. SL483]
218	NC_011205	198242586	YP_002214190.1	lipid-A-disaccharide synthase [Salmonella enterica subsp. enterica serovar Dublin str. CT_02021853]
218	NC_011274	205351566	YP_002225367.1	lipid-A-disaccharide synthase [Salmonella enterica subsp. enterica serovar Gallinarum str. 287/91]
218	NC_011294	207855747	YP_002242398.1	lipid-A-disaccharide synthase [Salmonella enterica subsp. enterica serovar Enteritidis str. P125109]
218	NC_012125	224582077	YP_002635875.1	lipid-A-disaccharide synthase [Salmonella enterica subsp. enterica serovar Paratyphi C strain RKS4594]
218	NC_016810	378698208	YP_005180165.1	Lipid-A-disaccharide synthase [Salmonella enterica subsp. enterica serovar Typhimurium str. SL1344]
218	NC_016831	378954038	YP_005211525.1	Lipid-A-disaccharide synthase [Salmonella enterica subsp. enterica serovar Gallinarum/pullorum str. RKS5078]
218	NC_016832	378958376	YP_005215862.1	Lipid-A-disaccharide synthase [Salmonella enterica subsp. enterica serovar Typhi str. P-stx-12]
218	NC_016854	378443682	YP_005231314.1	lipid-A-disaccharide synthase [Salmonella enterica subsp. enterica serovar Typhimurium str. D23580]
218	NC_016856	378448542	YP_005235901.1	lipid-A-disaccharide synthase [Salmonella enterica subsp. enterica serovar Typhimurium str. 14028S]
218	NC_016857	379699450	YP_005241178.1	lipid-A-disaccharide synthase [Salmonella enterica subsp. enterica serovar Typhimurium str. ST4/74]
218	NC_016860	378982771	YP_005245926.1	lipid-A-disaccharide synthase [Salmonella enterica subsp. enterica serovar Typhimurium str. T000240]
218	NC_016863	378987634	YP_005250798.1	lipid-A-disaccharide synthase [Salmonella enterica subsp. enterica serovar Typhimurium str. UK-1]
218	NC_017046	383495052	YP_005395741.1	Lipid-A-disaccharide synthase [Salmonella enterica subsp. enterica serovar Typhimurium str. 798]
218	NC_017623	386590121	YP_006086521.1	Lipid-A-disaccharide synthase [Salmonella enterica subsp. enterica serovar Heidelberg str. B182]
218	NC_020307	452121464	YP_007471712.1	lipid-A-disaccharide synthase [Salmonella enterica subsp. enterica serovar Javiana str. CFSAN001992]
218	NC_021151	482902780	YP_007901340.1	lipid-A-disaccharide synthase [Salmonella enterica subsp. enterica serovar Typhimurium str. U288]
218	NC_021176	488652791	YP_007924594.1	lipid-A-disaccharide synthase [Salmonella enterica subsp. enterica serovar Typhi str. Ty21a]
218	NC_021810	525816102	YP_008246120.1	lipid-A-disaccharide synthase [Salmonella enterica subsp. enterica serovar Heidelberg str. 41578]
218	NC_021812	525827729	YP_008250428.1	lipid-A-disaccharide synthase [Salmonella enterica subsp. enterica serovar Heidelberg str. CFSAN002069]
218	NC_021814	525839310	YP_008256591.1	lipid-A-disaccharide synthase [Salmonella enterica subsp. enterica serovar Typhimurium var. 5- str. CFSAN001921]
218	NC_021818	525856643	YP_008259479.1	lipid-A-disaccharide synthase [Salmonella enterica subsp. enterica serovar Cubana str. CFSAN002050]
218	NC_021820	526219177	YP_008264489.1	lipid-A-disaccharide synthase [Salmonella enterica subsp. enterica serovar 4,[5],12:i:- str. 08-1736]
218	NC_021844	525948314	YP_008309916.1	lipid-A-disaccharide synthase [Salmonella enterica subsp. enterica serovar Bareilly str. CFSAN000189]
218	NC_021902	528817939	YP_008359142.1	Lipid-A-disaccharide synthase [Salmonella enterica subsp. enterica serovar Newport str. USMARC-S3124.1]
218	NC_021984	529218960	YP_008379807.1	lipid-A-disaccharide synthase [Salmonella enterica subsp. enterica serovar Pullorum str. S06004]
218	NC_022221	537435604	YP_008479981.1	Lipid-A-disaccharide synthase [Salmonella enterica subsp. enterica serovar Gallinarum/pullorum str. CDC1983-67]
218	NC_022241	538360809	YP_008504094.1	hypothetical protein BN855_2450 [Salmonella enterica subsp. enterica serovar Bovismorbificans str. 3114]
218	NC_022525	549478337	YP_008612079.1	lipid-A-disaccharide synthase [Salmonella enterica subsp. enterica serovar Thompson str. RM6836]
218	NC_022544	549722953	YP_008643143.1	Lipid-A-disaccharide synthase [Salmonella enterica subsp. enterica serovar Typhimurium str. DT2]
218	NC_022569	550899650	YP_008668742.1	Lipid-A-disaccharide synthase [Salmonella enterica subsp. enterica serovar Typhimurium str. DT104]
221	NC_003197	16764111	NP_459726.1	cytochrome d terminal oxidase polypeptide subunit II [Salmonella enterica subsp. enterica serovar Typhimurium str. LT2]
221	NC_003198	16759680	NP_455297.1	cytochrome d ubiquinol oxidase subunit II [Salmonella enterica subsp. enterica serovar Typhi str. CT18]
221	NC_004631	29142547	NP_805889.1	cytochrome d ubiquinol oxidase subunit II [Salmonella enterica subsp. enterica serovar Typhi str. Ty2]
221	NC_006511	56414142	YP_151217.1	cytochrome d ubiquinol oxidase subunit II [Salmonella enterica subsp. enterica serovar Paratyphi A str. ATCC 9150]
221	NC_006905	62179315	YP_215732.1	cytochrome d terminal oxidase polypeptide subunit II [Salmonella enterica subsp. enterica serovar Choleraesuis str. SC-B67]
221	NC_010067	161504097	YP_001571209.1	hypothetical protein SARI_02195 [Salmonella enterica subsp. arizonae serovar 62:z4,z23:- str. RSK2980]
221	NC_010102	161615026	YP_001588991.1	hypothetical protein SPAB_02786 [Salmonella enterica subsp. enterica serovar Paratyphi B str. SPB7]
221	NC_011080	194443845	YP_002039982.1	cytochrome d ubiquinol oxidase subunit II [Salmonella enterica subsp. enterica serovar Newport str. SL254]
221	NC_011083	194450450	YP_002044775.1	cytochrome d ubiquinol oxidase subunit II [Salmonella enterica subsp. enterica serovar Heidelberg str. SL476]
221	NC_011094	194734408	YP_002113849.1	cytochrome d ubiquinol oxidase subunit II [Salmonella enterica subsp. enterica serovar Schwarzengrund str. CVM19633]
221	NC_011147	197363064	YP_002142701.1	cytochrome d ubiquinol oxidase subunit II [Salmonella enterica subsp. enterica serovar Paratyphi A str. AKU_12601]
221	NC_011149	197247810	YP_002145702.1	cytochrome d ubiquinol oxidase subunit II [Salmonella enterica subsp. enterica serovar Agona str. SL483]
221	NC_011205	198244832	YP_002214711.1	cytochrome d ubiquinol oxidase subunit II [Salmonella enterica subsp. enterica serovar Dublin str. CT_02021853]
221	NC_011274	205352005	YP_002225806.1	cytochrome d ubiquinol oxidase subunit II [Salmonella enterica subsp. enterica serovar Gallinarum str. 287/91]
221	NC_011294	207856185	YP_002242836.1	cytochrome d ubiquinol oxidase subunit II [Salmonella enterica subsp. enterica serovar Enteritidis str. P125109]
221	NC_012125	224582560	YP_002636358.1	cytochrome d ubiquinol oxidase subunit II [Salmonella enterica subsp. enterica serovar Paratyphi C strain RKS4594]
221	NC_016810	378698684	YP_005180641.1	cytochrome d ubiquinol oxidase subunit II [Salmonella enterica subsp. enterica serovar Typhimurium str. SL1344]
221	NC_016831	378955890	YP_005213377.1	cytochrome d ubiquinol oxidase subunit II [Salmonella enterica subsp. enterica serovar Gallinarum/pullorum str. RKS5078]
221	NC_016832	378960298	YP_005217784.1	Cytochrome d ubiquinol oxidase subunit 2 [Salmonella enterica subsp. enterica serovar Typhi str. P-stx-12]
221	NC_016854	378444225	YP_005231857.1	cytochrome D ubiquinol oxidase subunit II [Salmonella enterica subsp. enterica serovar Typhimurium str. D23580]
221	NC_016856	378449103	YP_005236462.1	cytochrome d terminal oxidase polypeptide subunit II [Salmonella enterica subsp. enterica serovar Typhimurium str. 14028S]
221	NC_016857	379699954	YP_005241682.1	cytochrome d ubiquinol oxidase subunit II [Salmonella enterica subsp. enterica serovar Typhimurium str. ST4/74]
221	NC_016860	378983339	YP_005246494.1	cytochrome d ubiquinol oxidase subunit II [Salmonella enterica subsp. enterica serovar Typhimurium str. T000240]
221	NC_016863	378988131	YP_005251295.1	cytochrome d terminal oxidase polypeptide subunit II [Salmonella enterica subsp. enterica serovar Typhimurium str. UK-1]
221	NC_017046	383495528	YP_005396217.1	cytochrome d ubiquinol oxidase subunit II [Salmonella enterica subsp. enterica serovar Typhimurium str. 798]
221	NC_017623	386590657	YP_006087057.1	Cytochrome d ubiquinol oxidase subunit II [Salmonella enterica subsp. enterica serovar Heidelberg str. B182]
221	NC_020307	452121041	YP_007471289.1	cytochrome d ubiquinol oxidase subunit 2 [Salmonella enterica subsp. enterica serovar Javiana str. CFSAN001992]
221	NC_021151	482904679	YP_007903239.1	cytochrome d ubiquinol oxidase subunit 2 [Salmonella enterica subsp. enterica serovar Typhimurium str. U288]
221	NC_021176	488654638	YP_007926441.1	cytochrome d ubiquinol oxidase, subunit II [Salmonella enterica subsp. enterica serovar Typhi str. Ty21a]
221	NC_021810	525816668	YP_008246686.1	cytochrome d ubiquinol oxidase subunit 2 [Salmonella enterica subsp. enterica serovar Heidelberg str. 41578]
221	NC_021812	525827295	YP_008249874.1	cytochrome BD oxidase subunit II [Salmonella enterica subsp. enterica serovar Heidelberg str. CFSAN002069]
221	NC_021814	525838870	YP_008256026.1	cytochrome BD oxidase subunit II [Salmonella enterica subsp. enterica serovar Typhimurium var. 5- str. CFSAN001921]
221	NC_021818	525857038	YP_008259976.1	cytochrome BD oxidase subunit II [Salmonella enterica subsp. enterica serovar Cubana str. CFSAN002050]
221	NC_021820	526219574	YP_008264983.1	cytochrome BD oxidase subunit II [Salmonella enterica subsp. enterica serovar 4,[5],12:i:- str. 08-1736]
221	NC_021844	525947940	YP_008309431.1	cytochrome BD oxidase subunit II [Salmonella enterica subsp. enterica serovar Bareilly str. CFSAN000189]
221	NC_021902	528818458	YP_008359661.1	Cytochrome d ubiquinol oxidase subunit 2 [Salmonella enterica subsp. enterica serovar Newport str. USMARC-S3124.1]
221	NC_021984	529220271	YP_008381487.1	cytochrome BD oxidase subunit II [Salmonella enterica subsp. enterica serovar Pullorum str. S06004]
221	NC_022221	537437457	YP_008481834.1	cytochrome d ubiquinol oxidase subunit II [Salmonella enterica subsp. enterica serovar Gallinarum/pullorum str. CDC1983-67]
221	NC_022241	538361269	YP_008504554.1	cytochrome d ubiquinol oxidase, subunit II [Salmonella enterica subsp. enterica serovar Bovismorbificans str. 3114]
221	NC_022525	549478727	YP_008612570.1	cytochrome BD oxidase subunit II [Salmonella enterica subsp. enterica serovar Thompson str. RM6836]
221	NC_022544	549723433	YP_008643623.1	cytochrome d ubiquinol oxidase subunit II [Salmonella enterica subsp. enterica serovar Typhimurium str. DT2]
221	NC_022569	550900166	YP_008669258.1	cytochrome d ubiquinol oxidase subunit II [Salmonella enterica subsp. enterica serovar Typhimurium str. DT104]
226	NC_003197	16767007	NP_462622.1	glucosyltransferase I [Salmonella enterica subsp. enterica serovar Typhimurium str. LT2]
226	NC_003198	16762587	NP_458204.1	lipopolysaccharide core biosynthesis protein [Salmonella enterica subsp. enterica serovar Typhi str. CT18]
226	NC_004631	29144076	NP_807418.1	lipopolysaccharide core biosynthesis protein [Salmonella enterica subsp. enterica serovar Typhi str. Ty2]
226	NC_006511	56415612	YP_152687.1	lipopolysaccharide core biosynthesis protein [Salmonella enterica subsp. enterica serovar Paratyphi A str. ATCC 9150]
226	NC_006905	62182215	YP_218632.1	glucosyltransferase I [Salmonella enterica subsp. enterica serovar Choleraesuis str. SC-B67]
226	NC_010067	161505743	YP_001572855.1	hypothetical protein SARI_03919 [Salmonella enterica subsp. arizonae serovar 62:z4,z23:- str. RSK2980]
226	NC_010102	161616800	YP_001590765.1	hypothetical protein SPAB_04619 [Salmonella enterica subsp. enterica serovar Paratyphi B str. SPB7]
226	NC_011080	194446741	YP_002042972.1	lipopolysaccharide core biosynthesis protein RfaG [Salmonella enterica subsp. enterica serovar Newport str. SL254]
226	NC_011083	194449220	YP_002047753.1	lipopolysaccharide core biosynthesis protein RfaG [Salmonella enterica subsp. enterica serovar Heidelberg str. SL476]
226	NC_011094	194737226	YP_002116657.1	lipopolysaccharide core biosynthesis protein RfaG [Salmonella enterica subsp. enterica serovar Schwarzengrund str. CVM19633]
226	NC_011147	197364539	YP_002144176.1	lipopolysaccharide core biosynthesis protein [Salmonella enterica subsp. enterica serovar Paratyphi A str. AKU_12601]
226	NC_011149	197250020	YP_002148654.1	lipopolysaccharide core biosynthesis protein RfaG [Salmonella enterica subsp. enterica serovar Agona str. SL483]
226	NC_011205	198243128	YP_002217683.1	lipopolysaccharide core biosynthesis protein RfaG [Salmonella enterica subsp. enterica serovar Dublin str. CT_02021853]
226	NC_011274	205354676	YP_002228477.1	lipopolysaccharide core biosynthesis protein [Salmonella enterica subsp. enterica serovar Gallinarum str. 287/91]
226	NC_011294	207858959	YP_002245610.1	lipopolysaccharide core biosynthesis protein [Salmonella enterica subsp. enterica serovar Enteritidis str. P125109]
226	NC_012125	224585522	YP_002639321.1	lipopolysaccharide core biosynthesis protein [Salmonella enterica subsp. enterica serovar Paratyphi C strain RKS4594]
226	NC_016810	378701610	YP_005183568.1	lipopolysaccharide core biosynthesis protein [Salmonella enterica subsp. enterica serovar Typhimurium str. SL1344]
226	NC_016831	378957423	YP_005214910.1	lipopolysaccharide core biosynthesis protein [Salmonella enterica subsp. enterica serovar Gallinarum/pullorum str. RKS5078]
226	NC_016832	378961964	YP_005219450.1	UDP-glucose:(Heptosyl)LPS alpha-1,3-glucosyltransferase [Salmonella enterica subsp. enterica serovar Typhi str. P-stx-12]
226	NC_016854	378447091	YP_005234723.1	lipopolysaccharide core biosynthesis protein [Salmonella enterica subsp. enterica serovar Typhimurium str. D23580]
226	NC_016856	378452603	YP_005239963.1	glucosyltransferase I [Salmonella enterica subsp. enterica serovar Typhimurium str. 14028S]
226	NC_016857	379702983	YP_005244711.1	glucosyltransferase I [Salmonella enterica subsp. enterica serovar Typhimurium str. ST4/74]
226	NC_016860	378986319	YP_005249475.1	lipopolysaccharide core biosynthesis protein [Salmonella enterica subsp. enterica serovar Typhimurium str. T000240]
226	NC_016863	378991024	YP_005254188.1	glucosyltransferase I [Salmonella enterica subsp. enterica serovar Typhimurium str. UK-1]
226	NC_017046	383498357	YP_005399046.1	lipopolysaccharide core biosynthesis protein [Salmonella enterica subsp. enterica serovar Typhimurium str. 798]
226	NC_017623	386593394	YP_006089794.1	UDP-glucose:(heptosyl) LPS alpha1,3-glucosyltransferase WaaG [Salmonella enterica subsp. enterica serovar Heidelberg str. B182]
226	NC_020307	452122484	YP_007472732.1	glucosyltransferase I RfaG [Salmonella enterica subsp. enterica serovar Javiana str. CFSAN001992]
226	NC_021151	482906286	YP_007904846.1	glucosyltransferase I RfaG [Salmonella enterica subsp. enterica serovar Typhimurium str. U288]
226	NC_021176	488656236	YP_007928039.1	lipopolysaccharide core biosynthesis protein [Salmonella enterica subsp. enterica serovar Typhi str. Ty21a]
226	NC_021810	525814994	YP_008245012.1	glucosyltransferase I RfaG [Salmonella enterica subsp. enterica serovar Heidelberg str. 41578]
226	NC_021812	525828574	YP_008251466.1	glucosyltransferase [Salmonella enterica subsp. enterica serovar Heidelberg str. CFSAN002069]
226	NC_021814	525840194	YP_008257664.1	glucosyltransferase [Salmonella enterica subsp. enterica serovar Typhimurium var. 5- str. CFSAN001921]
226	NC_021818	525859367	YP_008262966.1	glucosyltransferase [Salmonella enterica subsp. enterica serovar Cubana str. CFSAN002050]
226	NC_021820	526218387	YP_008263535.1	glucosyltransferase [Salmonella enterica subsp. enterica serovar 4,[5],12:i:- str. 08-1736]
226	NC_021844	525945660	YP_008306621.1	glucosyltransferase [Salmonella enterica subsp. enterica serovar Bareilly str. CFSAN000189]
226	NC_021902	528816874	YP_008358077.1	Lipopolysaccharide core biosynthesis protein rfaG [Salmonella enterica subsp. enterica serovar Newport str. USMARC-S3124.1]
226	NC_021984	529221482	YP_008383013.1	glucosyltransferase [Salmonella enterica subsp. enterica serovar Pullorum str. S06004]
226	NC_022221	537438992	YP_008483369.1	lipopolysaccharide core biosynthesis protein [Salmonella enterica subsp. enterica serovar Gallinarum/pullorum str. CDC1983-67]
226	NC_022241	538364332	YP_008507617.1	hypothetical protein BN855_38170 [Salmonella enterica subsp. enterica serovar Bovismorbificans str. 3114]
226	NC_022525	549481002	YP_008615358.1	glucosyltransferase [Salmonella enterica subsp. enterica serovar Thompson str. RM6836]
226	NC_022544	549726275	YP_008646465.1	lipopolysaccharide core biosynthesis protein [Salmonella enterica subsp. enterica serovar Typhimurium str. DT2]
226	NC_022569	550903065	YP_008672157.1	lipopolysaccharide core biosynthesis protein [Salmonella enterica subsp. enterica serovar Typhimurium str. DT104]
230	NC_003197	16766450	NP_462065.1	hydrogenase 2 small subunit [Salmonella enterica subsp. enterica serovar Typhimurium str. LT2]
230	NC_003198	16761928	NP_457545.1	hydrogenase-2 small chain protein [Salmonella enterica subsp. enterica serovar Typhi str. CT18]
230	NC_004631	29143415	NP_806757.1	hydrogenase 2 small subunit [Salmonella enterica subsp. enterica serovar Typhi str. Ty2]
230	NC_006511	56415091	YP_152166.1	hydrogenase-2 small subunit [Salmonella enterica subsp. enterica serovar Paratyphi A str. ATCC 9150]
230	NC_006905	62181661	YP_218078.1	hydrogenase 2 small subunit [Salmonella enterica subsp. enterica serovar Choleraesuis str. SC-B67]
230	NC_010067	161506279	YP_001573391.1	hydrogenase 2 small subunit [Salmonella enterica subsp. arizonae serovar 62:z4,z23:- str. RSK2980]
230	NC_010102	161616130	YP_001590095.1	hydrogenase 2 small subunit [Salmonella enterica subsp. enterica serovar Paratyphi B str. SPB7]
230	NC_011080	194446655	YP_002042414.1	hydrogenase 2 small subunit [Salmonella enterica subsp. enterica serovar Newport str. SL254]
230	NC_011083	194450897	YP_002047145.1	hydrogenase 2 small subunit [Salmonella enterica subsp. enterica serovar Heidelberg str. SL476]
230	NC_011094	194735997	YP_002116105.1	hydrogenase 2 small subunit [Salmonella enterica subsp. enterica serovar Schwarzengrund str. CVM19633]
230	NC_011147	197364020	YP_002143657.1	hydrogenase 2 small subunit [Salmonella enterica subsp. enterica serovar Paratyphi A str. AKU_12601]
230	NC_011149	197248842	YP_002148071.1	hydrogenase 2 small subunit [Salmonella enterica subsp. enterica serovar Agona str. SL483]
230	NC_011205	198244463	YP_002217127.1	hydrogenase 2 small subunit [Salmonella enterica subsp. enterica serovar Dublin str. CT_02021853]
230	NC_011274	205354068	YP_002227869.1	hydrogenase 2 small subunit [Salmonella enterica subsp. enterica serovar Gallinarum str. 287/91]
230	NC_011294	207858409	YP_002245060.1	hydrogenase 2 small subunit [Salmonella enterica subsp. enterica serovar Enteritidis str. P125109]
230	NC_012125	224584946	YP_002638745.1	hydrogenase 2 small subunit [Salmonella enterica subsp. enterica serovar Paratyphi C strain RKS4594]
230	NC_016810	378701056	YP_005183013.1	hydrogenase-2 small chain protein [Salmonella enterica subsp. enterica serovar Typhimurium str. SL1344]
230	NC_016831	378956768	YP_005214255.1	hydrogenase-2 small chain protein [Salmonella enterica subsp. enterica serovar Gallinarum/pullorum str. RKS5078]
230	NC_016832	378961246	YP_005218732.1	Hydrogenase-2 small chain [Salmonella enterica subsp. enterica serovar Typhi str. P-stx-12]
230	NC_016854	378446501	YP_005234133.1	hydrogenase-2 small chain protein [Salmonella enterica subsp. enterica serovar Typhimurium str. D23580]
230	NC_016856	378451953	YP_005239313.1	hydrogenase 2 small subunit [Salmonella enterica subsp. enterica serovar Typhimurium str. 14028S]
230	NC_016857	379702408	YP_005244136.1	hydrogenase 2 small subunit [Salmonella enterica subsp. enterica serovar Typhimurium str. ST4/74]
230	NC_016860	378985745	YP_005248901.1	hydrogenase 2 small subunit [Salmonella enterica subsp. enterica serovar Typhimurium str. T000240]
230	NC_016863	378990468	YP_005253632.1	hydrogenase 2 small subunit [Salmonella enterica subsp. enterica serovar Typhimurium str. UK-1]
230	NC_017046	383497810	YP_005398499.1	hydrogenase-2 small subunit [Salmonella enterica subsp. enterica serovar Typhimurium str. 798]
230	NC_017623	386592849	YP_006089249.1	Uptake hydrogenase small subunit precursor [Salmonella enterica subsp. enterica serovar Heidelberg str. B182]
230	NC_020307	452123029	YP_007473277.1	hydrogenase 2 small subunit [Salmonella enterica subsp. enterica serovar Javiana str. CFSAN001992]
230	NC_021151	482905717	YP_007904277.1	hydrogenase 2 small subunit [Salmonella enterica subsp. enterica serovar Typhimurium str. U288]
230	NC_021176	488655534	YP_007927337.1	hydrogenase 2 small subunit [Salmonella enterica subsp. enterica serovar Typhi str. Ty21a]
230	NC_021810	525814435	YP_008244453.1	hydrogenase 2 small subunit [Salmonella enterica subsp. enterica serovar Heidelberg str. 41578]
230	NC_021812	525829040	YP_008252044.1	hydrogenase 2 small subunit [Salmonella enterica subsp. enterica serovar Heidelberg str. CFSAN002069]
230	NC_021814	525836993	YP_008253667.1	hydrogenase 2 small subunit [Salmonella enterica subsp. enterica serovar Typhimurium var. 5- str. CFSAN001921]
230	NC_021818	525858904	YP_008262405.1	hydrogenase 2 small subunit [Salmonella enterica subsp. enterica serovar Cubana str. CFSAN002050]
230	NC_021820	526221514	YP_008267354.1	hydrogenase 2 small subunit [Salmonella enterica subsp. enterica serovar 4,[5],12:i:- str. 08-1736]
230	NC_021844	525946125	YP_008307181.1	hydrogenase 2 small subunit [Salmonella enterica subsp. enterica serovar Bareilly str. CFSAN000189]
230	NC_021902	528820989	YP_008362192.1	Hydrogenase-2 small chain [Salmonella enterica subsp. enterica serovar Newport str. USMARC-S3124.1]
230	NC_021984	529220973	YP_008382404.1	hydrogenase 2 small subunit [Salmonella enterica subsp. enterica serovar Pullorum str. S06004]
230	NC_022221	537438333	YP_008482710.1	hydrogenase-2 small chain protein [Salmonella enterica subsp. enterica serovar Gallinarum/pullorum str. CDC1983-67]
230	NC_022241	538363747	YP_008507032.1	putative Ni/Fe hydrogenases, small subunit [Salmonella enterica subsp. enterica serovar Bovismorbificans str. 3114]
230	NC_022525	549480537	YP_008614798.1	hydrogenase 2 small subunit [Salmonella enterica subsp. enterica serovar Thompson str. RM6836]
230	NC_022544	549725713	YP_008645903.1	hydrogenase-2 small chain protein [Salmonella enterica subsp. enterica serovar Typhimurium str. DT2]
230	NC_022569	550902510	YP_008671602.1	hydrogenase-2 small chain protein [Salmonella enterica subsp. enterica serovar Typhimurium str. DT104]
242	NC_003197	16763515	NP_459130.1	phospho-N-acetylmuramoyl-pentapeptide-transferase [Salmonella enterica subsp. enterica serovar Typhimurium str. LT2]
242	NC_003198	16759120	NP_454737.1	phospho-N-acetylmuramoyl-pentapeptide-transferase [Salmonella enterica subsp. enterica serovar Typhi str. CT18]
242	NC_004631	29140670	NP_804012.1	phospho-N-acetylmuramoyl-pentapeptide-transferase [Salmonella enterica subsp. enterica serovar Typhi str. Ty2]
242	NC_006511	56412397	YP_149472.1	phospho-N-acetylmuramoyl-pentapeptide- transferase [Salmonella enterica subsp. enterica serovar Paratyphi A str. ATCC 9150]
242	NC_006905	62178692	YP_215109.1	phospho-N-acetylmuramoyl-pentapeptide-transferase [Salmonella enterica subsp. enterica serovar Choleraesuis str. SC-B67]
242	NC_010067	161504753	YP_001571865.1	phospho-N-acetylmuramoyl-pentapeptide-transferase [Salmonella enterica subsp. arizonae serovar 62:z4,z23:- str. RSK2980]
242	NC_010102	161612469	YP_001586434.1	phospho-N-acetylmuramoyl-pentapeptide-transferase [Salmonella enterica subsp. enterica serovar Paratyphi B str. SPB7]
242	NC_011080	194442805	YP_002039357.1	phospho-N-acetylmuramoyl-pentapeptide-transferase [Salmonella enterica subsp. enterica serovar Newport str. SL254]
242	NC_011083	194448066	YP_002044095.1	phospho-N-acetylmuramoyl-pentapeptide-transferase [Salmonella enterica subsp. enterica serovar Heidelberg str. SL476]
242	NC_011094	194735332	YP_002113143.1	phospho-N-acetylmuramoyl-pentapeptide-transferase [Salmonella enterica subsp. enterica serovar Schwarzengrund str. CVM19633]
242	NC_011147	197361333	YP_002140968.1	phospho-N-acetylmuramoyl-pentapeptide-transferase [Salmonella enterica subsp. enterica serovar Paratyphi A str. AKU_12601]
242	NC_011149	197248344	YP_002145111.1	phospho-N-acetylmuramoyl-pentapeptide-transferase [Salmonella enterica subsp. enterica serovar Agona str. SL483]
242	NC_011205	198244846	YP_002214077.1	phospho-N-acetylmuramoyl-pentapeptide-transferase [Salmonella enterica subsp. enterica serovar Dublin str. CT_02021853]
242	NC_011274	205351464	YP_002225265.1	phospho-N-acetylmuramoyl-pentapeptide-transferase [Salmonella enterica subsp. enterica serovar Gallinarum str. 287/91]
242	NC_011294	207855639	YP_002242290.1	phospho-N-acetylmuramoyl-pentapeptide-transferase [Salmonella enterica subsp. enterica serovar Enteritidis str. P125109]
242	NC_012125	224581968	YP_002635766.1	phospho-N-acetylmuramoyl-pentapeptide-transferase [Salmonella enterica subsp. enterica serovar Paratyphi C strain RKS4594]
242	NC_016810	378698105	YP_005180062.1	phospho-N-acetylmuramoyl-pentapeptide-transferase [Salmonella enterica subsp. enterica serovar Typhimurium str. SL1344]
242	NC_016831	378953929	YP_005211416.1	phospho-N-acetylmuramoyl-pentapeptide- transferase [Salmonella enterica subsp. enterica serovar Gallinarum/pullorum str. RKS5078]
242	NC_016832	378958272	YP_005215758.1	Phospho-N-acetylmuramoyl-pentapeptide- transferase [Salmonella enterica subsp. enterica serovar Typhi str. P-stx-12]
242	NC_016854	378443579	YP_005231211.1	UDP-MurNAc-pentapeptide phosphotransferase [Salmonella enterica subsp. enterica serovar Typhimurium str. D23580]
242	NC_016856	378448425	YP_005235784.1	phospho-N-acetylmuramoyl-pentapeptide- transferase [Salmonella enterica subsp. enterica serovar Typhimurium str. 14028S]
242	NC_016857	379699346	YP_005241074.1	phospho-N-acetylmuramoyl-pentapeptide- transferase [Salmonella enterica subsp. enterica serovar Typhimurium str. ST4/74]
242	NC_016860	378982666	YP_005245821.1	phospho-N-acetylmuramoyl-pentapeptide transferase [Salmonella enterica subsp. enterica serovar Typhimurium str. T000240]
242	NC_016863	378987531	YP_005250695.1	phospho-N-acetylmuramoyl-pentapeptide- transferase [Salmonella enterica subsp. enterica serovar Typhimurium str. UK-1]
242	NC_017046	383494947	YP_005395636.1	phospho-N-acetylmuramoyl-pentapeptide-transferase [Salmonella enterica subsp. enterica serovar Typhimurium str. 798]
242	NC_017623	386590004	YP_006086404.1	phospho-N-acetylmuramoyl-pentapeptide-transferase [Salmonella enterica subsp. enterica serovar Heidelberg str. B182]
242	NC_020307	452121570	YP_007471818.1	phospho-N-acetylmuramoyl-pentapeptide-transferase [Salmonella enterica subsp. enterica serovar Javiana str. CFSAN001992]
242	NC_021151	482902674	YP_007901234.1	phospho-N-acetylmuramoyl-pentapeptide-transferase [Salmonella enterica subsp. enterica serovar Typhimurium str. U288]
242	NC_021176	488652690	YP_007924493.1	phospho-N-acetylmuramoyl-pentapeptide-transferase [Salmonella enterica subsp. enterica serovar Typhi str. Ty21a]
242	NC_021810	525815982	YP_008246000.1	phospho-N-acetylmuramoyl-pentapeptide-transferase [Salmonella enterica subsp. enterica serovar Heidelberg str. 41578]
242	NC_021812	525827827	YP_008250547.1	phospho-N-acetylmuramoyl-pentapeptide-transferase [Salmonella enterica subsp. enterica serovar Heidelberg str. CFSAN002069]
242	NC_021814	525839408	YP_008256698.1	phospho-N-acetylmuramoyl-pentapeptide-transferase [Salmonella enterica subsp. enterica serovar Typhimurium var. 5- str. CFSAN001921]
242	NC_021818	525856545	YP_008259357.1	phospho-N-acetylmuramoyl-pentapeptide-transferase [Salmonella enterica subsp. enterica serovar Cubana str. CFSAN002050]
242	NC_021820	526219078	YP_008264384.1	phospho-N-acetylmuramoyl-pentapeptide-transferase [Salmonella enterica subsp. enterica serovar 4,[5],12:i:- str. 08-1736]
242	NC_021844	525948412	YP_008310036.1	phospho-N-acetylmuramoyl-pentapeptide-transferase [Salmonella enterica subsp. enterica serovar Bareilly str. CFSAN000189]
242	NC_021902	528817824	YP_008359027.1	Phospho-N-acetylmuramoyl-pentapeptide- transferase [Salmonella enterica subsp. enterica serovar Newport str. USMARC-S3124.1]
242	NC_021984	529218876	YP_008379713.1	phospho-N-acetylmuramoyl-pentapeptide-transferase [Salmonella enterica subsp. enterica serovar Pullorum str. S06004]
242	NC_022221	537435495	YP_008479872.1	phospho-N-acetylmuramoyl-pentapeptide- transferase [Salmonella enterica subsp. enterica serovar Gallinarum/pullorum str. CDC1983-67]
242	NC_022241	538360696	YP_008503981.1	phospho-N-acetylmuramoyl-pentapeptide transferase [Salmonella enterica subsp. enterica serovar Bovismorbificans str. 3114]
242	NC_022525	549478239	YP_008611958.1	phospho-N-acetylmuramoyl-pentapeptide-transferase [Salmonella enterica subsp. enterica serovar Thompson str. RM6836]
242	NC_022544	549722850	YP_008643040.1	Phospho-N-acetylmuramoyl-pentapeptide-transfera se [Salmonella enterica subsp. enterica serovar Typhimurium str. DT2]
242	NC_022569	550899550	YP_008668642.1	Phospho-N-acetylmuramoyl-pentapeptide-transferase [Salmonella enterica subsp. enterica serovar Typhimurium str. DT104]
244	NC_003197	16766369	NP_461984.1	fructose-bisphosphate aldolase [Salmonella enterica subsp. enterica serovar Typhimurium str. LT2]
244	NC_003198	16761850	NP_457467.1	fructose 1,6-bisphosphate aldolase [Salmonella enterica subsp. enterica serovar Typhi str. CT18]
244	NC_004631	29143337	NP_806679.1	fructose-bisphosphate aldolase [Salmonella enterica subsp. enterica serovar Typhi str. Ty2]
244	NC_006511	56415014	YP_152089.1	fructose 1,6-bisphosphate aldolase [Salmonella enterica subsp. enterica serovar Paratyphi A str. ATCC 9150]
244	NC_006905	162139549	YP_217997.2	fructose-bisphosphate aldolase [Salmonella enterica subsp. enterica serovar Choleraesuis str. SC-B67]
244	NC_010067	161506380	YP_001573492.1	fructose-bisphosphate aldolase [Salmonella enterica subsp. arizonae serovar 62:z4,z23:- str. RSK2980]
244	NC_010102	229307086	YP_001589990.2	fructose-bisphosphate aldolase [Salmonella enterica subsp. enterica serovar Paratyphi B str. SPB7]
244	NC_011080	194444299	YP_002042322.1	fructose-bisphosphate aldolase [Salmonella enterica subsp. enterica serovar Newport str. SL254]
244	NC_011083	194451269	YP_002047055.1	fructose-bisphosphate aldolase [Salmonella enterica subsp. enterica serovar Heidelberg str. SL476]
244	NC_011094	194735008	YP_002116016.1	fructose-bisphosphate aldolase [Salmonella enterica subsp. enterica serovar Schwarzengrund str. CVM19633]
244	NC_011147	197363943	YP_002143580.1	fructose-bisphosphate aldolase [Salmonella enterica subsp. enterica serovar Paratyphi A str. AKU_12601]
244	NC_011149	197248963	YP_002147982.1	fructose-bisphosphate aldolase [Salmonella enterica subsp. enterica serovar Agona str. SL483]
244	NC_011205	198243554	YP_002217046.1	fructose-bisphosphate aldolase [Salmonella enterica subsp. enterica serovar Dublin str. CT_02021853]
244	NC_011274	205353992	YP_002227793.1	fructose-bisphosphate aldolase [Salmonella enterica subsp. enterica serovar Gallinarum str. 287/91]
244	NC_011294	207858331	YP_002244982.1	fructose-bisphosphate aldolase [Salmonella enterica subsp. enterica serovar Enteritidis str. P125109]
244	NC_012125	224584861	YP_002638659.1	fructose-bisphosphate aldolase [Salmonella enterica subsp. enterica serovar Paratyphi C strain RKS4594]
244	NC_016810	378700976	YP_005182933.1	fructose 1,6-bisphosphate aldolase [Salmonella enterica subsp. enterica serovar Typhimurium str. SL1344]
244	NC_016831	378956685	YP_005214172.1	fructose 1,6-bisphosphate aldolase [Salmonella enterica subsp. enterica serovar Gallinarum/pullorum str. RKS5078]
244	NC_016832	378961160	YP_005218646.1	Fructose-bisphosphate aldolase, class II [Salmonella enterica subsp. enterica serovar Typhi str. P-stx-12]
244	NC_016854	378446422	YP_005234054.1	fructose 1,6-bisphosphate aldolase [Salmonella enterica subsp. enterica serovar Typhimurium str. D23580]
244	NC_016856	378451851	YP_005239211.1	fructose-bisphosphate aldolase [Salmonella enterica subsp. enterica serovar Typhimurium str. 14028S]
244	NC_016857	379702325	YP_005244053.1	fructose-bisphosphate aldolase [Salmonella enterica subsp. enterica serovar Typhimurium str. ST4/74]
244	NC_016860	378985661	YP_005248817.1	fructose-bisphosphate aldolase [Salmonella enterica subsp. enterica serovar Typhimurium str. T000240]
244	NC_016863	378990388	YP_005253552.1	fructose-bisphosphate aldolase [Salmonella enterica subsp. enterica serovar Typhimurium str. UK-1]
244	NC_017046	383497732	YP_005398421.1	fructose 1,6-bisphosphate aldolase [Salmonella enterica subsp. enterica serovar Typhimurium str. 798]
244	NC_017623	386592772	YP_006089172.1	Fructose-bisphosphate aldolase class II [Salmonella enterica subsp. enterica serovar Heidelberg str. B182]
244	NC_020307	452123115	YP_007473363.1	fructose-bisphosphate aldolase [Salmonella enterica subsp. enterica serovar Javiana str. CFSAN001992]
244	NC_021151	482905632	YP_007904192.1	fructose-bisphosphate aldolase [Salmonella enterica subsp. enterica serovar Typhimurium str. U288]
244	NC_021176	488655454	YP_007927257.1	fructose-bisphosphate aldolase [Salmonella enterica subsp. enterica serovar Typhi str. Ty21a]
244	NC_021810	525814349	YP_008244367.1	fructose-bisphosphate aldolase [Salmonella enterica subsp. enterica serovar Heidelberg str. 41578]
244	NC_021812	525829111	YP_008252126.1	fructose-bisphosphate aldolase [Salmonella enterica subsp. enterica serovar Heidelberg str. CFSAN002069]
244	NC_021814	525837064	YP_008253750.1	fructose-bisphosphate aldolase [Salmonella enterica subsp. enterica serovar Typhimurium var. 5- str. CFSAN001921]
244	NC_021818	525858819	YP_008262207.1	fructose-bisphosphate aldolase [Salmonella enterica subsp. enterica serovar Cubana str. CFSAN002050]
244	NC_021820	526221444	YP_008267274.1	fructose-bisphosphate aldolase [Salmonella enterica subsp. enterica serovar 4,[5],12:i:- str. 08-1736]
244	NC_021844	525946196	YP_008307263.1	fructose-bisphosphate aldolase [Salmonella enterica subsp. enterica serovar Bareilly str. CFSAN000189]
244	NC_021902	528820896	YP_008362099.1	Fructose-bisphosphate aldolase [Salmonella enterica subsp. enterica serovar Newport str. USMARC-S3124.1]
244	NC_021984	529220905	YP_008382324.1	fructose-bisphosphate aldolase [Salmonella enterica subsp. enterica serovar Pullorum str. S06004]
244	NC_022221	537438249	YP_008482626.1	fructose 1,6-bisphosphate aldolase [Salmonella enterica subsp. enterica serovar Gallinarum/pullorum str. CDC1983-67]
244	NC_022241	538363658	YP_008506943.1	fructose-bisphosphate aldolase [Salmonella enterica subsp. enterica serovar Bovismorbificans str. 3114]
244	NC_022525	549480466	YP_008614716.1	fructose-bisphosphate aldolase [Salmonella enterica subsp. enterica serovar Thompson str. RM6836]
244	NC_022544	549725633	YP_008645823.1	fructose 1,6-bisphosphate aldolase [Salmonella enterica subsp. enterica serovar Typhimurium str. DT2]
244	NC_022569	550902431	YP_008671523.1	fructose 1,6-bisphosphate aldolase [Salmonella enterica subsp. enterica serovar Typhimurium str. DT104]
245	NC_003197	16767497	NP_463112.1	alanine racemase [Salmonella enterica subsp. enterica serovar Typhimurium str. LT2]
245	NC_003198	16762928	NP_458545.1	alanine racemase [Salmonella enterica subsp. enterica serovar Typhi str. CT18]
245	NC_004631	29144415	NP_807757.1	alanine racemase [Salmonella enterica subsp. enterica serovar Typhi str. Ty2]
245	NC_006511	56416047	YP_153122.1	alanine racemase [Salmonella enterica subsp. enterica serovar Paratyphi A str. ATCC 9150]
245	NC_006905	62182696	YP_219113.1	alanine racemase [Salmonella enterica subsp. enterica serovar Choleraesuis str. SC-B67]
245	NC_010067	161505290	YP_001572402.1	alanine racemase [Salmonella enterica subsp. arizonae serovar 62:z4,z23:- str. RSK2980]
245	NC_010102	161617376	YP_001591341.1	alanine racemase [Salmonella enterica subsp. enterica serovar Paratyphi B str. SPB7]
245	NC_011080	194444595	YP_002043497.1	alanine racemase [Salmonella enterica subsp. enterica serovar Newport str. SL254]
245	NC_011083	194448214	YP_002048237.1	alanine racemase [Salmonella enterica subsp. enterica serovar Heidelberg str. SL476]
245	NC_011094	194735891	YP_002117180.1	alanine racemase [Salmonella enterica subsp. enterica serovar Schwarzengrund str. CVM19633]
245	NC_011147	197364974	YP_002144611.1	alanine racemase [Salmonella enterica subsp. enterica serovar Paratyphi A str. AKU_12601]
245	NC_011149	197249755	YP_002149160.1	alanine racemase [Salmonella enterica subsp. enterica serovar Agona str. SL483]
245	NC_011205	198244007	YP_002218141.1	alanine racemase [Salmonella enterica subsp. enterica serovar Dublin str. CT_02021853]
245	NC_011274	205355019	YP_002228820.1	alanine racemase [Salmonella enterica subsp. enterica serovar Gallinarum str. 287/91]
245	NC_011294	207859401	YP_002246052.1	alanine racemase [Salmonella enterica subsp. enterica serovar Enteritidis str. P125109]
245	NC_012125	224586012	YP_002639811.1	alanine racemase [Salmonella enterica subsp. enterica serovar Paratyphi C strain RKS4594]
245	NC_016810	378702090	YP_005184048.1	alanine racemase [Salmonella enterica subsp. enterica serovar Typhimurium str. SL1344]
245	NC_016831	378957803	YP_005215290.1	alanine racemase [Salmonella enterica subsp. enterica serovar Gallinarum/pullorum str. RKS5078]
245	NC_016832	378962337	YP_005219823.1	Alanine racemase [Salmonella enterica subsp. enterica serovar Typhi str. P-stx-12]
245	NC_016854	378447566	YP_005235198.1	alanine racemase [Salmonella enterica subsp. enterica serovar Typhimurium str. D23580]
245	NC_016856	378453180	YP_005240540.1	alanine racemase [Salmonella enterica subsp. enterica serovar Typhimurium str. 14028S]
245	NC_016857	379703487	YP_005245215.1	alanine racemase [Salmonella enterica subsp. enterica serovar Typhimurium str. ST4/74]
245	NC_016860	378986923	YP_005250079.1	alanine racemase [Salmonella enterica subsp. enterica serovar Typhimurium str. T000240]
245	NC_016863	378991516	YP_005254680.1	alanine racemase [Salmonella enterica subsp. enterica serovar Typhimurium str. UK-1]
245	NC_017046	383498827	YP_005399516.1	alanine racemase [Salmonella enterica subsp. enterica serovar Typhimurium str. 798]
245	NC_017623	386589573	YP_006085973.1	alanine racemase [Salmonella enterica subsp. enterica serovar Heidelberg str. B182]
245	NC_020307	452122019	YP_007472267.1	alanine racemase [Salmonella enterica subsp. enterica serovar Javiana str. CFSAN001992]
245	NC_021151	482906787	YP_007905347.1	alanine racemase [Salmonella enterica subsp. enterica serovar Typhimurium str. U288]
245	NC_021176	488656590	YP_007928393.1	alanine racemase [Salmonella enterica subsp. enterica serovar Typhi str. Ty21a]
245	NC_021810	525815534	YP_008245552.1	alanine racemase [Salmonella enterica subsp. enterica serovar Heidelberg str. 41578]
245	NC_021812	525828177	YP_008250985.1	alanine racemase [Salmonella enterica subsp. enterica serovar Heidelberg str. CFSAN002069]
245	NC_021814	525839785	YP_008257166.1	alanine racemase [Salmonella enterica subsp. enterica serovar Typhimurium var. 5- str. CFSAN001921]
245	NC_021818	525856177	YP_008258850.1	alanine racemase [Salmonella enterica subsp. enterica serovar Cubana str. CFSAN002050]
245	NC_021820	526218702	YP_008263921.1	alanine racemase [Salmonella enterica subsp. enterica serovar 4,[5],12:i:- str. 08-1736]
245	NC_021844	525948775	YP_008310514.1	alanine racemase [Salmonella enterica subsp. enterica serovar Bareilly str. CFSAN000189]
245	NC_021902	528817280	YP_008358483.1	Alanine racemase [Salmonella enterica subsp. enterica serovar Newport str. USMARC-S3124.1]
245	NC_021984	529221748	YP_008383352.1	alanine racemase [Salmonella enterica subsp. enterica serovar Pullorum str. S06004]
245	NC_022221	537439371	YP_008483748.1	alanine racemase [Salmonella enterica subsp. enterica serovar Gallinarum/pullorum str. CDC1983-67]
245	NC_022241	538364827	YP_008508112.1	alanine racemase [Salmonella enterica subsp. enterica serovar Bovismorbificans str. 3114]
245	NC_022525	549481409	YP_008615843.1	alanine racemase [Salmonella enterica subsp. enterica serovar Thompson str. RM6836]
245	NC_022544	549726761	YP_008646951.1	alanine racemase [Salmonella enterica subsp. enterica serovar Typhimurium str. DT2]
245	NC_022569	550903591	YP_008672683.1	alanine racemase [Salmonella enterica subsp. enterica serovar Typhimurium str. DT104]
246	NC_003197	16767541	NP_463156.1	sensor protein BasS/PmrB [Salmonella enterica subsp. enterica serovar Typhimurium str. LT2]
246	NC_003198	16762973	NP_458590.1	two-component sensor kinase [Salmonella enterica subsp. enterica serovar Typhi str. CT18]
246	NC_004631	29144460	NP_807802.1	sensor protein BasS/PmrB [Salmonella enterica subsp. enterica serovar Typhi str. Ty2]
246	NC_006511	56416090	YP_153165.1	two-component sensor kinase [Salmonella enterica subsp. enterica serovar Paratyphi A str. ATCC 9150]
246	NC_006905	62182740	YP_219157.1	sensor protein BasS/PmrB [Salmonella enterica subsp. enterica serovar Choleraesuis str. SC-B67]
246	NC_010067	161505228	YP_001572340.1	sensor protein BasS/PmrB [Salmonella enterica subsp. arizonae serovar 62:z4,z23:- str. RSK2980]
246	NC_010102	161617434	YP_001591399.1	sensor protein BasS/PmrB [Salmonella enterica subsp. enterica serovar Paratyphi B str. SPB7]
246	NC_011080	194443672	YP_002043541.1	sensor protein BasS/PmrB [Salmonella enterica subsp. enterica serovar Newport str. SL254]
246	NC_011083	194451298	YP_002048282.1	sensor protein BasS/PmrB [Salmonella enterica subsp. enterica serovar Heidelberg str. SL476]
246	NC_011094	194733917	YP_002117226.1	sensor protein BasS/PmrB [Salmonella enterica subsp. enterica serovar Schwarzengrund str. CVM19633]
246	NC_011147	197365016	YP_002144653.1	sensor protein BasS/PmrB [Salmonella enterica subsp. enterica serovar Paratyphi A str. AKU_12601]
246	NC_011149	197250751	YP_002149206.1	sensor protein BasS/PmrB [Salmonella enterica subsp. enterica serovar Agona str. SL483]
246	NC_011205	198244901	YP_002218183.1	sensor protein BasS/PmrB [Salmonella enterica subsp. enterica serovar Dublin str. CT_02021853]
246	NC_011274	205355062	YP_002228863.1	sensor protein BasS/PmrB [Salmonella enterica subsp. enterica serovar Gallinarum str. 287/91]
246	NC_011294	207859445	YP_002246096.1	sensor protein BasS/PmrB [Salmonella enterica subsp. enterica serovar Enteritidis str. P125109]
246	NC_012125	224586056	YP_002639855.1	sensor protein BasS/PmrB [Salmonella enterica subsp. enterica serovar Paratyphi C strain RKS4594]
246	NC_016810	378702134	YP_005184092.1	two-component sensor kinase [Salmonella enterica subsp. enterica serovar Typhimurium str. SL1344]
246	NC_016831	378957847	YP_005215334.1	two-component sensor kinase [Salmonella enterica subsp. enterica serovar Gallinarum/pullorum str. RKS5078]
246	NC_016832	378962383	YP_005219869.1	hypothetical protein STBHUCCB_44400 [Salmonella enterica subsp. enterica serovar Typhi str. P-stx-12]
246	NC_016854	378447610	YP_005235242.1	two-component sensor kinase [Salmonella enterica subsp. enterica serovar Typhimurium str. D23580]
246	NC_016856	378453238	YP_005240598.1	sensor protein BasS/PmrB [Salmonella enterica subsp. enterica serovar Typhimurium str. 14028S]
246	NC_016857	379703533	YP_005245261.1	sensor protein BasS/PmrB [Salmonella enterica subsp. enterica serovar Typhimurium str. ST4/74]
246	NC_016860	378986967	YP_005250123.1	sensor kinase BasS/PmrB [Salmonella enterica subsp. enterica serovar Typhimurium str. T000240]
246	NC_016863	378991559	YP_005254723.1	sensor protein BasS/PmrB [Salmonella enterica subsp. enterica serovar Typhimurium str. UK-1]
246	NC_017046	383498869	YP_005399558.1	two-component sensor kinase [Salmonella enterica subsp. enterica serovar Typhimurium str. 798]
246	NC_017623	386589617	YP_006086017.1	Sensor protein basS/pmrB [Salmonella enterica subsp. enterica serovar Heidelberg str. B182]
246	NC_020307	452121972	YP_007472220.1	sensor protein BasS/PmrB [Salmonella enterica subsp. enterica serovar Javiana str. CFSAN001992]
246	NC_021151	482906829	YP_007905389.1	sensor protein BasS/PmrB [Salmonella enterica subsp. enterica serovar Typhimurium str. U288]
246	NC_021176	488656634	YP_007928437.1	sensor protein BasS/PmrB [Salmonella enterica subsp. enterica serovar Typhi str. Ty21a]
246	NC_021810	525815580	YP_008245598.1	sensor protein BasS/PmrB [Salmonella enterica subsp. enterica serovar Heidelberg str. 41578]
246	NC_021812	559996976	YP_008250939.2	sensor protein BasS/PmrB [Salmonella enterica subsp. enterica serovar Heidelberg str. CFSAN002069]
246	NC_021814	525841187	YP_008257121.1	sensor protein BasS/PmrB [Salmonella enterica subsp. enterica serovar Typhimurium var. 5- str. CFSAN001921]
246	NC_021818	525859486	YP_008258896.1	sensor protein BasS/PmrB [Salmonella enterica subsp. enterica serovar Cubana str. CFSAN002050]
246	NC_021820	526221874	YP_008263966.1	sensor protein BasS/PmrB [Salmonella enterica subsp. enterica serovar 4,[5],12:i:- str. 08-1736]
246	NC_021844	525949827	YP_008310468.1	sensor protein BasS/PmrB [Salmonella enterica subsp. enterica serovar Bareilly str. CFSAN000189]
246	NC_021902	528817325	YP_008358528.1	Sensor protein BasS [Salmonella enterica subsp. enterica serovar Newport str. USMARC-S3124.1]
246	NC_021984	529222760	YP_008383397.1	sensor protein BasS/PmrB [Salmonella enterica subsp. enterica serovar Pullorum str. S06004]
246	NC_022221	537439415	YP_008483792.1	two-component sensor kinase [Salmonella enterica subsp. enterica serovar Gallinarum/pullorum str. CDC1983-67]
246	NC_022241	538364874	YP_008508159.1	sensor protein BasS/pmrB [Salmonella enterica subsp. enterica serovar Bovismorbificans str. 3114]
246	NC_022525	549482407	YP_008615889.1	sensor protein BasS/PmrB [Salmonella enterica subsp. enterica serovar Thompson str. RM6836]
246	NC_022544	549726805	YP_008646995.1	two-component sensor kinase [Salmonella enterica subsp. enterica serovar Typhimurium str. DT2]
246	NC_022569	550903635	YP_008672727.1	two-component sensor kinase [Salmonella enterica subsp. enterica serovar Typhimurium str. DT104]
250	NC_003197	16767008	NP_462623.1	lipopolysaccharide core biosynthesis protein [Salmonella enterica subsp. enterica serovar Typhimurium str. LT2]
250	NC_003198	16762586	NP_458203.1	lipopolysaccharide core biosynthesis protein [Salmonella enterica subsp. enterica serovar Typhi str. CT18]
250	NC_004631	29144075	NP_807417.1	lipopolysaccharide core biosynthesis protein [Salmonella enterica subsp. enterica serovar Typhi str. Ty2]
250	NC_006511	56415613	YP_152688.1	lipopolysaccharide core biosynthesis protein [Salmonella enterica subsp. enterica serovar Paratyphi A str. ATCC 9150]
250	NC_006905	62182216	YP_218633.1	lipopolysaccharide core biosynthesis protein [Salmonella enterica subsp. enterica serovar Choleraesuis str. SC-B67]
250	NC_010067	161505742	YP_001572854.1	lipopolysaccharide core biosynthesis protein [Salmonella enterica subsp. arizonae serovar 62:z4,z23:- str. RSK2980]
250	NC_010102	161616801	YP_001590766.1	lipopolysaccharide core biosynthesis protein [Salmonella enterica subsp. enterica serovar Paratyphi B str. SPB7]
250	NC_011080	194443756	YP_002042973.1	lipopolysaccharide core biosynthesis protein [Salmonella enterica subsp. enterica serovar Newport str. SL254]
250	NC_011083	194449746	YP_002047754.1	lipopolysaccharide core biosynthesis protein [Salmonella enterica subsp. enterica serovar Heidelberg str. SL476]
250	NC_011094	194735337	YP_002116658.1	lipopolysaccharide core biosynthesis protein [Salmonella enterica subsp. enterica serovar Schwarzengrund str. CVM19633]
250	NC_011147	197364540	YP_002144177.1	lipopolysaccharide core biosynthesis protein [Salmonella enterica subsp. enterica serovar Paratyphi A str. AKU_12601]
250	NC_011149	197251087	YP_002148655.1	lipopolysaccharide core biosynthesis protein [Salmonella enterica subsp. enterica serovar Agona str. SL483]
250	NC_011205	198246122	YP_002217684.1	lipopolysaccharide core biosynthesis protein [Salmonella enterica subsp. enterica serovar Dublin str. CT_02021853]
250	NC_011274	205354675	YP_002228476.1	lipopolysaccharide core biosynthesis protein [Salmonella enterica subsp. enterica serovar Gallinarum str. 287/91]
250	NC_011294	207858960	YP_002245611.1	lipopolysaccharide core biosynthesis protein [Salmonella enterica subsp. enterica serovar Enteritidis str. P125109]
250	NC_012125	224585523	YP_002639322.1	lipopolysaccharide core biosynthesis protein [Salmonella enterica subsp. enterica serovar Paratyphi C strain RKS4594]
250	NC_016810	378701611	YP_005183569.1	lipopolysaccharide core biosynthesis protein [Salmonella enterica subsp. enterica serovar Typhimurium str. SL1344]
250	NC_016831	378957422	YP_005214909.1	lipopolysaccharide core biosynthesis protein [Salmonella enterica subsp. enterica serovar Gallinarum/pullorum str. RKS5078]
250	NC_016832	378961963	YP_005219449.1	Lipopolysaccharide core heptosyltransferase rfaQ [Salmonella enterica subsp. enterica serovar Typhi str. P-stx-12]
250	NC_016854	378447092	YP_005234724.1	lipopolysaccharide core biosynthesis protein [Salmonella enterica subsp. enterica serovar Typhimurium str. D23580]
250	NC_016856	378452604	YP_005239964.1	lipopolysaccharide core biosynthesis protein [Salmonella enterica subsp. enterica serovar Typhimurium str. 14028S]
250	NC_016857	379702984	YP_005244712.1	lipopolysaccharide core biosynthesis protein [Salmonella enterica subsp. enterica serovar Typhimurium str. ST4/74]
250	NC_016860	378986320	YP_005249476.1	lipopolysaccharide core biosynthesis protein [Salmonella enterica subsp. enterica serovar Typhimurium str. T000240]
250	NC_016863	378991025	YP_005254189.1	lipopolysaccharide core biosynthesis protein [Salmonella enterica subsp. enterica serovar Typhimurium str. UK-1]
250	NC_017046	383498358	YP_005399047.1	lipopolysaccharide core biosynthesis protein [Salmonella enterica subsp. enterica serovar Typhimurium str. 798]
250	NC_017623	386593395	YP_006089795.1	Lipopolysaccharide heptosyltransferase III [Salmonella enterica subsp. enterica serovar Heidelberg str. B182]
250	NC_020307	452122483	YP_007472731.1	lipopolysaccharide core heptosyltransferase RfaQ [Salmonella enterica subsp. enterica serovar Javiana str. CFSAN001992]
250	NC_021151	482906287	YP_007904847.1	lipopolysaccharide core heptosyltransferase RfaQ [Salmonella enterica subsp. enterica serovar Typhimurium str. U288]
250	NC_021176	488656235	YP_007928038.1	lipopolysaccharide core biosynthesis protein [Salmonella enterica subsp. enterica serovar Typhi str. Ty21a]
250	NC_021810	525814995	YP_008245013.1	lipopolysaccharide core heptosyltransferase RfaQ [Salmonella enterica subsp. enterica serovar Heidelberg str. 41578]
250	NC_021812	525828573	YP_008251465.1	lipopolysaccharide core heptosyltransferase RfaQ [Salmonella enterica subsp. enterica serovar Heidelberg str. CFSAN002069]
250	NC_021814	525840193	YP_008257663.1	lipopolysaccharide core heptosyltransferase RfaQ [Salmonella enterica subsp. enterica serovar Typhimurium var. 5- str. CFSAN001921]
250	NC_021818	525859368	YP_008262967.1	lipopolysaccharide core heptosyltransferase RfaQ [Salmonella enterica subsp. enterica serovar Cubana str. CFSAN002050]
250	NC_021820	526218386	YP_008263534.1	lipopolysaccharide core heptosyltransferase RfaQ [Salmonella enterica subsp. enterica serovar 4,[5],12:i:- str. 08-1736]
250	NC_021844	525945659	YP_008306620.1	lipopolysaccharide core heptosyltransferase RfaQ [Salmonella enterica subsp. enterica serovar Bareilly str. CFSAN000189]
250	NC_021902	528816873	YP_008358076.1	Lipopolysaccharide core heptosyltransferase rfaQ [Salmonella enterica subsp. enterica serovar Newport str. USMARC-S3124.1]
250	NC_021984	529221481	YP_008383012.1	lipopolysaccharide core heptosyltransferase RfaQ [Salmonella enterica subsp. enterica serovar Pullorum str. S06004]
250	NC_022221	537438991	YP_008483368.1	lipopolysaccharide core biosynthesis protein [Salmonella enterica subsp. enterica serovar Gallinarum/pullorum str. CDC1983-67]
250	NC_022241	538364333	YP_008507618.1	putative lipopolysaccharide heptosyltransferase III [Salmonella enterica subsp. enterica serovar Bovismorbificans str. 3114]
250	NC_022525	549481003	YP_008615359.1	lipopolysaccharide core heptosyltransferase RfaQ [Salmonella enterica subsp. enterica serovar Thompson str. RM6836]
250	NC_022544	549726276	YP_008646466.1	lipopolysaccharide core biosynthesis protein [Salmonella enterica subsp. enterica serovar Typhimurium str. DT2]
250	NC_022569	550903066	YP_008672158.1	lipopolysaccharide core biosynthesis protein [Salmonella enterica subsp. enterica serovar Typhimurium str. DT104]
259	NC_003197	16765259	NP_460874.1	chemotaxis-specific methylesterase [Salmonella enterica subsp. enterica serovar Typhimurium str. LT2]
259	NC_003198	16760866	NP_456483.1	protein-glutamate methylesterase [Salmonella enterica subsp. enterica serovar Typhi str. CT18]
259	NC_004631	29141442	NP_804784.1	chemotaxis-specific methylesterase [Salmonella enterica subsp. enterica serovar Typhi str. Ty2]
259	NC_006511	56413163	YP_150238.1	protein-glutamate methylesterase [Salmonella enterica subsp. enterica serovar Paratyphi A str. ATCC 9150]
259	NC_006905	62180494	YP_216911.1	chemotaxis-specific methylesterase [Salmonella enterica subsp. enterica serovar Choleraesuis str. SC-B67]
259	NC_010067	161502967	YP_001570079.1	chemotaxis-specific methylesterase [Salmonella enterica subsp. arizonae serovar 62:z4,z23:- str. RSK2980]
259	NC_010102	161613523	YP_001587488.1	chemotaxis-specific methylesterase [Salmonella enterica subsp. enterica serovar Paratyphi B str. SPB7]
259	NC_011080	194442838	YP_002041183.1	chemotaxis-specific methylesterase [Salmonella enterica subsp. enterica serovar Newport str. SL254]
259	NC_011083	194448548	YP_002045971.1	chemotaxis-specific methylesterase [Salmonella enterica subsp. enterica serovar Heidelberg str. SL476]
259	NC_011094	194736588	YP_002114953.1	chemotaxis-specific methylesterase [Salmonella enterica subsp. enterica serovar Schwarzengrund str. CVM19633]
259	NC_011147	197362089	YP_002141726.1	chemotaxis-specific methylesterase [Salmonella enterica subsp. enterica serovar Paratyphi A str. AKU_12601]
259	NC_011149	197251203	YP_002146104.1	chemotaxis-specific methylesterase [Salmonella enterica subsp. enterica serovar Agona str. SL483]
259	NC_011205	198242380	YP_002215166.1	chemotaxis-specific methylesterase [Salmonella enterica subsp. enterica serovar Dublin str. CT_02021853]
259	NC_011274	205352379	YP_002226180.1	chemotaxis-specific methylesterase [Salmonella enterica subsp. enterica serovar Gallinarum str. 287/91]
259	NC_011294	207856562	YP_002243213.1	chemotaxis-specific methylesterase [Salmonella enterica subsp. enterica serovar Enteritidis str. P125109]
259	NC_012125	224583579	YP_002637377.1	chemotaxis-specific methylesterase [Salmonella enterica subsp. enterica serovar Paratyphi C strain RKS4594]
259	NC_016810	378699789	YP_005181746.1	Chemotaxis response regulator protein-glutamate methylesterase [Salmonella enterica subsp. enterica serovar Typhimurium str. SL1344]
259	NC_016831	378955479	YP_005212966.1	Chemotaxis response regulator protein-glutamate methylesterase [Salmonella enterica subsp. enterica serovar Gallinarum/pullorum str. RKS5078]
259	NC_016832	378959116	YP_005216602.1	Chemotaxis response regulator protein-glutamate methylesterase [Salmonella enterica subsp. enterica serovar Typhi str. P-stx-12]
259	NC_016854	378445308	YP_005232940.1	Chemotaxis response regulator protein-glutamate methylesterase [Salmonella enterica subsp. enterica serovar Typhimurium str. D23580]
259	NC_016856	378450526	YP_005237885.1	chemotaxis-specific methylesterase [Salmonella enterica subsp. enterica serovar Typhimurium str. 14028S]
259	NC_016857	379701102	YP_005242830.1	chemotaxis-specific methylesterase [Salmonella enterica subsp. enterica serovar Typhimurium str. ST4/74]
259	NC_016860	378984483	YP_005247638.1	chemotaxis-specific methylesterase [Salmonella enterica subsp. enterica serovar Typhimurium str. T000240]
259	NC_016863	378989263	YP_005252427.1	chemotaxis-specific methylesterase [Salmonella enterica subsp. enterica serovar Typhimurium str. UK-1]
259	NC_017046	383496596	YP_005397285.1	Chemotaxis response regulator protein-glutamate methylesterase [Salmonella enterica subsp. enterica serovar Typhimurium str. 798]
259	NC_017623	386591754	YP_006088154.1	Chemotaxis response regulator protein-glutamate methylesterase CheB [Salmonella enterica subsp. enterica serovar Heidelberg str. B182]
259	NC_020307	452119884	YP_007470132.1	chemotaxis-specific protein-glutamate methyltransferase [Salmonella enterica subsp. enterica serovar Javiana str. CFSAN001992]
259	NC_021151	482903738	YP_007902298.1	chemotaxis-specific protein-glutamate methyltransferase [Salmonella enterica subsp. enterica serovar Typhimurium str. U288]
259	NC_021176	488653495	YP_007925298.1	chemotaxis-specific methylesterase [Salmonella enterica subsp. enterica serovar Typhi str. Ty21a]
259	NC_021810	525817813	YP_008247831.1	chemotaxis-specific protein-glutamate methyltransferase [Salmonella enterica subsp. enterica serovar Heidelberg str. 41578]
259	NC_021812	525829972	YP_008253178.1	chemotaxis protein [Salmonella enterica subsp. enterica serovar Heidelberg str. CFSAN002069]
259	NC_021814	525837962	YP_008254876.1	chemotaxis protein [Salmonella enterica subsp. enterica serovar Typhimurium var. 5- str. CFSAN001921]
259	NC_021818	525857994	YP_008261186.1	chemotaxis protein [Salmonella enterica subsp. enterica serovar Cubana str. CFSAN002050]
259	NC_021820	526220493	YP_008266125.1	chemotaxis protein [Salmonella enterica subsp. enterica serovar 4,[5],12:i:- str. 08-1736]
259	NC_021844	525947024	YP_008308300.1	chemotaxis protein [Salmonella enterica subsp. enterica serovar Bareilly str. CFSAN000189]
259	NC_021902	528819730	YP_008360933.1	Chemotaxis response regulator protein-glutamate methylesterase [Salmonella enterica subsp. enterica serovar Newport str. USMARC-S3124.1]
259	NC_021984	529219975	YP_008381113.1	chemotaxis protein [Salmonella enterica subsp. enterica serovar Pullorum str. S06004]
259	NC_022221	537437046	YP_008481423.1	Chemotaxis response regulator protein-glutamate methylesterase [Salmonella enterica subsp. enterica serovar Gallinarum/pullorum str. CDC1983-67]
259	NC_022241	538362539	YP_008505824.1	chemotaxis response regulator protein-glutamate methylesterase CheB [Salmonella enterica subsp. enterica serovar Bovismorbificans str. 3114]
259	NC_022525	549479645	YP_008613700.1	chemotaxis protein [Salmonella enterica subsp. enterica serovar Thompson str. RM6836]
259	NC_022544	549724542	YP_008644732.1	Chemotaxis response regulator protein-glutamate methylesterase [Salmonella enterica subsp. enterica serovar Typhimurium str. DT2]
259	NC_022569	550901316	YP_008670408.1	Chemotaxis response regulator protein-glutamate methylesterase [Salmonella enterica subsp. enterica serovar Typhimurium str. DT104]
260	NC_003197	16767271	NP_462886.1	nitrogen regulation protein NR(II) [Salmonella enterica subsp. enterica serovar Typhimurium str. LT2]
260	NC_003198	16762426	NP_458043.1	Two-component system sensory histidine kinase [Salmonella enterica subsp. enterica serovar Typhi str. CT18]
260	NC_004631	29143914	NP_807256.1	nitrogen regulation protein NR(II) [Salmonella enterica subsp. enterica serovar Typhi str. Ty2]
260	NC_006511	56415852	YP_152927.1	two-component system sensory histidine kinase [Salmonella enterica subsp. enterica serovar Paratyphi A str. ATCC 9150]
260	NC_006905	62182468	YP_218885.1	nitrogen regulation protein NR(II) [Salmonella enterica subsp. enterica serovar Choleraesuis str. SC-B67]
260	NC_010067	161505494	YP_001572606.1	nitrogen regulation protein NR(II) [Salmonella enterica subsp. arizonae serovar 62:z4,z23:- str. RSK2980]
260	NC_010102	161617129	YP_001591094.1	nitrogen regulation protein NR(II) [Salmonella enterica subsp. enterica serovar Paratyphi B str. SPB7]
260	NC_011080	194444506	YP_002043228.1	nitrogen regulation protein NR(II) [Salmonella enterica subsp. enterica serovar Newport str. SL254]
260	NC_011083	194450587	YP_002048009.1	nitrogen regulation protein NR(II) [Salmonella enterica subsp. enterica serovar Heidelberg str. SL476]
260	NC_011094	194736166	YP_002116926.1	nitrogen regulation protein NR(II) [Salmonella enterica subsp. enterica serovar Schwarzengrund str. CVM19633]
260	NC_011147	197364782	YP_002144419.1	nitrogen regulation protein NR(II) [Salmonella enterica subsp. enterica serovar Paratyphi A str. AKU_12601]
260	NC_011149	197249594	YP_002148925.1	nitrogen regulation protein NR(II) [Salmonella enterica subsp. enterica serovar Agona str. SL483]
260	NC_011205	198243097	YP_002217927.1	nitrogen regulation protein NR(II) [Salmonella enterica subsp. enterica serovar Dublin str. CT_02021853]
260	NC_011274	205354411	YP_002228212.1	nitrogen regulation protein NR(II) [Salmonella enterica subsp. enterica serovar Gallinarum str. 287/91]
260	NC_011294	207859198	YP_002245849.1	nitrogen regulation protein NR(II) [Salmonella enterica subsp. enterica serovar Enteritidis str. P125109]
260	NC_012125	224585816	YP_002639615.1	nitrogen regulation protein NR(II) [Salmonella enterica subsp. enterica serovar Paratyphi C strain RKS4594]
260	NC_016810	378701864	YP_005183822.1	Two-component system sensory histidine kinase [Salmonella enterica subsp. enterica serovar Typhimurium str. SL1344]
260	NC_016831	378957256	YP_005214743.1	Two-component system sensory histidine kinase [Salmonella enterica subsp. enterica serovar Gallinarum/pullorum str. RKS5078]
260	NC_016832	378961773	YP_005219259.1	Nitrogen regulation protein ntrB [Salmonella enterica subsp. enterica serovar Typhi str. P-stx-12]
260	NC_016854	378447343	YP_005234975.1	Two-component system sensory histidine kinase [Salmonella enterica subsp. enterica serovar Typhimurium str. D23580]
260	NC_016856	378452911	YP_005240271.1	nitrogen regulation protein NR(II) [Salmonella enterica subsp. enterica serovar Typhimurium str. 14028S]
260	NC_016857	379703248	YP_005244976.1	nitrogen regulation protein NR(II) [Salmonella enterica subsp. enterica serovar Typhimurium str. ST4/74]
260	NC_016860	378986690	YP_005249846.1	nitrogen regulation protein NR(II) [Salmonella enterica subsp. enterica serovar Typhimurium str. T000240]
260	NC_016863	378991287	YP_005254451.1	nitrogen regulation protein NR(II) [Salmonella enterica subsp. enterica serovar Typhimurium str. UK-1]
260	NC_017046	383498606	YP_005399295.1	two-component system sensory histidine kinase [Salmonella enterica subsp. enterica serovar Typhimurium str. 798]
260	NC_017623	386589363	YP_006085763.1	Nitrogen regulation protein NR(II) [Salmonella enterica subsp. enterica serovar Heidelberg str. B182]
260	NC_020307	452122221	YP_007472469.1	nitrogen regulation protein NR(II) [Salmonella enterica subsp. enterica serovar Javiana str. CFSAN001992]
260	NC_021151	482906556	YP_007905116.1	nitrogen regulation protein NR(II) [Salmonella enterica subsp. enterica serovar Typhimurium str. U288]
260	NC_021176	488656052	YP_007927855.1	nitrogen regulation protein NR(II) [Salmonella enterica subsp. enterica serovar Typhi str. Ty21a]
260	NC_021810	525815271	YP_008245289.1	nitrogen regulation protein NR(II) [Salmonella enterica subsp. enterica serovar Heidelberg str. 41578]
260	NC_021812	525828358	YP_008251205.1	nitrogen regulation protein NR(II) [Salmonella enterica subsp. enterica serovar Heidelberg str. CFSAN002069]
260	NC_021814	525839977	YP_008257397.1	nitrogen regulation protein NR(II) [Salmonella enterica subsp. enterica serovar Typhimurium var. 5- str. CFSAN001921]
260	NC_021818	525855940	YP_008258551.1	nitrogen regulation protein NR(II) [Salmonella enterica subsp. enterica serovar Cubana str. CFSAN002050]
260	NC_021820	526218169	YP_008263266.1	nitrogen regulation protein NR(II) [Salmonella enterica subsp. enterica serovar 4,[5],12:i:- str. 08-1736]
260	NC_021844	525948949	YP_008310722.1	nitrogen regulation protein NR(II) [Salmonella enterica subsp. enterica serovar Bareilly str. CFSAN000189]
260	NC_021902	528821437	YP_008362640.1	Nitrogen regulation protein NR(II) [Salmonella enterica subsp. enterica serovar Newport str. USMARC-S3124.1]
260	NC_021984	529221352	YP_008382857.1	nitrogen regulation protein NR(II) [Salmonella enterica subsp. enterica serovar Pullorum str. S06004]
260	NC_022221	537438825	YP_008483202.1	Two-component system sensory histidine kinase [Salmonella enterica subsp. enterica serovar Gallinarum/pullorum str. CDC1983-67]
260	NC_022241	538364584	YP_008507869.1	Two-component system sensory histidine kinase [Salmonella enterica subsp. enterica serovar Bovismorbificans str. 3114]
260	NC_022525	549481217	YP_008615614.1	nitrogen regulation protein NR(II) [Salmonella enterica subsp. enterica serovar Thompson str. RM6836]
260	NC_022544	549726531	YP_008646721.1	Two-component system sensory histidine kinase [Salmonella enterica subsp. enterica serovar Typhimurium str. DT2]
260	NC_022569	550903368	YP_008672460.1	Two-component system sensory histidine kinase [Salmonella enterica subsp. enterica serovar Typhimurium str. DT104]
261	NC_003197	16766996	NP_462611.1	ADP-heptose--LPS heptosyltransferase [Salmonella enterica subsp. enterica serovar Typhimurium str. LT2]
261	NC_003198	16762599	NP_458216.1	ADP-heptose-LPS heptosyltransferase II [Salmonella enterica subsp. enterica serovar Typhi str. CT18]
261	NC_004631	29144088	NP_807430.1	ADP-heptose:LPS heptosyltransferase II [Salmonella enterica subsp. enterica serovar Typhi str. Ty2]
261	NC_006511	56415601	YP_152676.1	ADP-heptose--LPS-heptosyltransferase II [Salmonella enterica subsp. enterica serovar Paratyphi A str. ATCC 9150]
261	NC_006905	62182204	YP_218621.1	ADP-heptose--LPS heptosyltransferase [Salmonella enterica subsp. enterica serovar Choleraesuis str. SC-B67]
261	NC_010067	161505754	YP_001572866.1	ADP-heptose:LPS heptosyltransferase II [Salmonella enterica subsp. arizonae serovar 62:z4,z23:- str. RSK2980]
261	NC_010102	161616789	YP_001590754.1	ADP-heptose:LPS heptosyltransferase II [Salmonella enterica subsp. enterica serovar Paratyphi B str. SPB7]
261	NC_011080	194443073	YP_002042961.1	ADP-heptose--LPS heptosyltransferase [Salmonella enterica subsp. enterica serovar Newport str. SL254]
261	NC_011083	194447352	YP_002047742.1	ADP-heptose--LPS heptosyltransferase [Salmonella enterica subsp. enterica serovar Heidelberg str. SL476]
261	NC_011094	194737811	YP_002116646.1	ADP-heptose--LPS heptosyltransferase [Salmonella enterica subsp. enterica serovar Schwarzengrund str. CVM19633]
261	NC_011147	197364528	YP_002144165.1	ADP-heptose--LPS heptosyltransferase [Salmonella enterica subsp. enterica serovar Paratyphi A str. AKU_12601]
261	NC_011149	197250450	YP_002148644.1	ADP-heptose--LPS heptosyltransferase [Salmonella enterica subsp. enterica serovar Agona str. SL483]
261	NC_011205	198243825	YP_002217673.1	ADP-heptose:LPS heptosyltransferase II [Salmonella enterica subsp. enterica serovar Dublin str. CT_02021853]
261	NC_011274	205354686	YP_002228487.1	ADP-heptose:LPS heptosyltransferase II [Salmonella enterica subsp. enterica serovar Gallinarum str. 287/91]
261	NC_011294	207858948	YP_002245599.1	ADP-heptose--LPS heptosyltransferase [Salmonella enterica subsp. enterica serovar Enteritidis str. P125109]
261	NC_012125	224585511	YP_002639310.1	ADP-heptose:LPS heptosyltransferase II [Salmonella enterica subsp. enterica serovar Paratyphi C strain RKS4594]
261	NC_016810	378701599	YP_005183557.1	ADP-heptose--LPS-heptosyltransferase II [Salmonella enterica subsp. enterica serovar Typhimurium str. SL1344]
261	NC_016831	378957434	YP_005214921.1	ADP-heptose--LPS-heptosyltransferase II [Salmonella enterica subsp. enterica serovar Gallinarum/pullorum str. RKS5078]
261	NC_016832	378961975	YP_005219461.1	ADP-heptose--LPS heptosyltransferase 2 [Salmonella enterica subsp. enterica serovar Typhi str. P-stx-12]
261	NC_016854	378447080	YP_005234712.1	ADP-heptose--LPS-heptosyltransferase II [Salmonella enterica subsp. enterica serovar Typhimurium str. D23580]
261	NC_016856	378452592	YP_005239952.1	ADP-heptose--LPS heptosyltransferase [Salmonella enterica subsp. enterica serovar Typhimurium str. 14028S]
261	NC_016857	379702972	YP_005244700.1	lipopolysaccharide heptosyltransferase II [Salmonella enterica subsp. enterica serovar Typhimurium str. ST4/74]
261	NC_016860	378986308	YP_005249464.1	ADP-heptose--LPS heptosyltransferase [Salmonella enterica subsp. enterica serovar Typhimurium str. T000240]
261	NC_016863	378991013	YP_005254177.1	ADP-heptose--LPS heptosyltransferase [Salmonella enterica subsp. enterica serovar Typhimurium str. UK-1]
261	NC_017046	383498346	YP_005399035.1	ADP-heptose--LPS-heptosyltransferase II [Salmonella enterica subsp. enterica serovar Typhimurium str. 798]
261	NC_017623	386593384	YP_006089784.1	ADP-heptose--lipooligosaccharide heptosyltransferase II [Salmonella enterica subsp. enterica serovar Heidelberg str. B182]
261	NC_020307	452122495	YP_007472743.1	ADP-heptose:LPS heptosyltransferase II [Salmonella enterica subsp. enterica serovar Javiana str. CFSAN001992]
261	NC_021151	482906275	YP_007904835.1	ADP-heptose:LPS heptosyltransferase II [Salmonella enterica subsp. enterica serovar Typhimurium str. U288]
261	NC_021176	488656247	YP_007928050.1	ADP-heptose:LPS heptosyltransferase II [Salmonella enterica subsp. enterica serovar Typhi str. Ty21a]
261	NC_021810	525814983	YP_008245001.1	ADP-heptose:LPS heptosyltransferase II [Salmonella enterica subsp. enterica serovar Heidelberg str. 41578]
261	NC_021812	525830575	YP_008251477.1	ADP-heptose:LPS heptosyl transferase [Salmonella enterica subsp. enterica serovar Heidelberg str. CFSAN002069]
261	NC_021814	525841290	YP_008257675.1	ADP-heptose:LPS heptosyl transferase [Salmonella enterica subsp. enterica serovar Typhimurium var. 5- str. CFSAN001921]
261	NC_021818	525860397	YP_008262955.1	ADP-heptose:LPS heptosyl transferase [Salmonella enterica subsp. enterica serovar Cubana str. CFSAN002050]
261	NC_021820	526221795	YP_008263546.1	ADP-heptose:LPS heptosyl transferase [Salmonella enterica subsp. enterica serovar 4,[5],12:i:- str. 08-1736]
261	NC_021844	525949066	YP_008306632.1	ADP-heptose:LPS heptosyl transferase [Salmonella enterica subsp. enterica serovar Bareilly str. CFSAN000189]
261	NC_021902	528816885	YP_008358088.1	ADP-heptose--LPS heptosyltransferase 2 [Salmonella enterica subsp. enterica serovar Newport str. USMARC-S3124.1]
261	NC_021984	529222679	YP_008383024.1	ADP-heptose:LPS heptosyl transferase [Salmonella enterica subsp. enterica serovar Pullorum str. S06004]
261	NC_022221	537439003	YP_008483380.1	ADP-heptose-LPS heptosyltransferase II [Salmonella enterica subsp. enterica serovar Gallinarum/pullorum str. CDC1983-67]
261	NC_022241	538364321	YP_008507606.1	hypothetical protein BN855_38060 [Salmonella enterica subsp. enterica serovar Bovismorbificans str. 3114]
261	NC_022525	549482314	YP_008615347.1	ADP-heptose:LPS heptosyl transferase [Salmonella enterica subsp. enterica serovar Thompson str. RM6836]
261	NC_022544	549726264	YP_008646454.1	ADP-heptose-LPS heptosyltransferase II [Salmonella enterica subsp. enterica serovar Typhimurium str. DT2]
261	NC_022569	550903054	YP_008672146.1	ADP-heptose-LPS heptosyltransferase II [Salmonella enterica subsp. enterica serovar Typhimurium str. DT104]
263	NC_003197	16767396	NP_463011.1	UDP-N-acetylenolpyruvoylglucosamine reductase [Salmonella enterica subsp. enterica serovar Typhimurium str. LT2]
263	NC_003198	16762311	NP_457928.1	UDP-N-acetylenolpyruvoylglucosamine reductase [Salmonella enterica subsp. enterica serovar Typhi str. CT18]
263	NC_004631	29143799	NP_807141.1	UDP-N-acetylenolpyruvoylglucosamine reductase [Salmonella enterica subsp. enterica serovar Typhi str. Ty2]
263	NC_006511	56415969	YP_153044.1	UDP-N-acetylenolpyruvoylglucosamine reductase [Salmonella enterica subsp. enterica serovar Paratyphi A str. ATCC 9150]
263	NC_006905	62182595	YP_219012.1	UDP-N-acetylenolpyruvoylglucosamine reductase [Salmonella enterica subsp. enterica serovar Choleraesuis str. SC-B67]
263	NC_010067	161505376	YP_001572488.1	UDP-N-acetylenolpyruvoylglucosamine reductase [Salmonella enterica subsp. arizonae serovar 62:z4,z23:- str. RSK2980]
263	NC_010102	161617277	YP_001591242.1	UDP-N-acetylenolpyruvoylglucosamine reductase [Salmonella enterica subsp. enterica serovar Paratyphi B str. SPB7]
263	NC_011080	194443092	YP_002043394.1	UDP-N-acetylenolpyruvoylglucosamine reductase [Salmonella enterica subsp. enterica serovar Newport str. SL254]
263	NC_011083	194447663	YP_002048129.1	UDP-N-acetylenolpyruvoylglucosamine reductase [Salmonella enterica subsp. enterica serovar Heidelberg str. SL476]
263	NC_011094	194737386	YP_002117045.1	UDP-N-acetylenolpyruvoylglucosamine reductase [Salmonella enterica subsp. enterica serovar Schwarzengrund str. CVM19633]
263	NC_011147	197364896	YP_002144533.1	UDP-N-acetylenolpyruvoylglucosamine reductase [Salmonella enterica subsp. enterica serovar Paratyphi A str. AKU_12601]
263	NC_011149	197248269	YP_002149053.1	UDP-N-acetylenolpyruvoylglucosamine reductase [Salmonella enterica subsp. enterica serovar Agona str. SL483]
263	NC_011205	198244381	YP_002218060.1	UDP-N-acetylenolpyruvoylglucosamine reductase [Salmonella enterica subsp. enterica serovar Dublin str. CT_02021853]
263	NC_011274	205354454	YP_002228255.1	UDP-N-acetylenolpyruvoylglucosamine reductase [Salmonella enterica subsp. enterica serovar Gallinarum str. 287/91]
263	NC_011294	207859321	YP_002245972.1	UDP-N-acetylenolpyruvoylglucosamine reductase [Salmonella enterica subsp. enterica serovar Enteritidis str. P125109]
263	NC_012125	224585684	YP_002639483.1	UDP-N-acetylenolpyruvoylglucosamine reductase [Salmonella enterica subsp. enterica serovar Paratyphi C strain RKS4594]
263	NC_016810	378701989	YP_005183947.1	UDP-N-acetylenolpyruvoylglucosamine reductase [Salmonella enterica subsp. enterica serovar Typhimurium str. SL1344]
263	NC_016831	378957046	YP_005214533.1	UDP-N-acetylenolpyruvoylglucosamine reductase [Salmonella enterica subsp. enterica serovar Gallinarum/pullorum str. RKS5078]
263	NC_016832	378961653	YP_005219139.1	UDP-N-acetylenolpyruvoylglucosamine reductase [Salmonella enterica subsp. enterica serovar Typhi str. P-stx-12]
263	NC_016854	378447468	YP_005235100.1	UDP-N-acetylenolpyruvoylglucosamine reductase [Salmonella enterica subsp. enterica serovar Typhimurium str. D23580]
263	NC_016856	378453060	YP_005240420.1	UDP-N-acetylenolpyruvoylglucosamine reductase [Salmonella enterica subsp. enterica serovar Typhimurium str. 14028S]
263	NC_016857	379703378	YP_005245106.1	UDP-N-acetylenolpyruvoylglucosamine reductase [Salmonella enterica subsp. enterica serovar Typhimurium str. ST4/74]
263	NC_016860	378986819	YP_005249975.1	UDP-N-acetylenolpyruvoylglucosamine reductase [Salmonella enterica subsp. enterica serovar Typhimurium str. T000240]
263	NC_016863	378991413	YP_005254577.1	UDP-N-acetylenolpyruvoylglucosamine reductase [Salmonella enterica subsp. enterica serovar Typhimurium str. UK-1]
263	NC_017046	383498730	YP_005399419.1	UDP-N-acetylenolpyruvoylglucosamine reductase [Salmonella enterica subsp. enterica serovar Typhimurium str. 798]
263	NC_017623	386589474	YP_006085874.1	UDP-N-acetylenolpyruvoylglucosamine reductase [Salmonella enterica subsp. enterica serovar Heidelberg str. B182]
263	NC_020307	452122095	YP_007472343.1	UDP-N-acetylenolpyruvoylglucosamine reductase [Salmonella enterica subsp. enterica serovar Javiana str. CFSAN001992]
263	NC_021151	482906683	YP_007905243.1	UDP-N-acetylenolpyruvoylglucosamine reductase [Salmonella enterica subsp. enterica serovar Typhimurium str. U288]
263	NC_021176	488655930	YP_007927733.1	UDP-N-acetylenolpyruvoylglucosamine reductase [Salmonella enterica subsp. enterica serovar Typhi str. Ty21a]
263	NC_021810	525815433	YP_008245451.1	UDP-N-acetylenolpyruvoylglucosamine reductase [Salmonella enterica subsp. enterica serovar Heidelberg str. 41578]
263	NC_021812	525828259	YP_008251085.1	UDP-N-acetylenolpyruvoylglucosamine reductase [Salmonella enterica subsp. enterica serovar Heidelberg str. CFSAN002069]
263	NC_021814	525839867	YP_008257268.1	UDP-N-acetylenolpyruvoylglucosamine reductase [Salmonella enterica subsp. enterica serovar Typhimurium var. 5- str. CFSAN001921]
263	NC_021818	525856043	YP_008258669.1	UDP-N-acetylenolpyruvoylglucosamine reductase [Salmonella enterica subsp. enterica serovar Cubana str. CFSAN002050]
263	NC_021820	526218059	YP_008263137.1	UDP-N-acetylenolpyruvoylglucosamine reductase [Salmonella enterica subsp. enterica serovar 4,[5],12:i:- str. 08-1736]
263	NC_021844	525948840	YP_008310595.1	UDP-N-acetylenolpyruvoylglucosamine reductase [Salmonella enterica subsp. enterica serovar Bareilly str. CFSAN000189]
263	NC_021902	528821264	YP_008362467.1	UDP-N-acetylenolpyruvoylglucosamine reductase [Salmonella enterica subsp. enterica serovar Newport str. USMARC-S3124.1]
263	NC_021984	529221189	YP_008382658.1	UDP-N-acetylenolpyruvoylglucosamine reductase [Salmonella enterica subsp. enterica serovar Pullorum str. S06004]
263	NC_022221	537438611	YP_008482988.1	UDP-N-acetylenolpyruvoylglucosamine reductase [Salmonella enterica subsp. enterica serovar Gallinarum/pullorum str. CDC1983-67]
263	NC_022241	538364720	YP_008508005.1	UDP-N-acetylenolpyruvoylglucosamine reductase [Salmonella enterica subsp. enterica serovar Bovismorbificans str. 3114]
263	NC_022525	549481327	YP_008615742.1	UDP-N-acetylenolpyruvoylglucosamine reductase [Salmonella enterica subsp. enterica serovar Thompson str. RM6836]
263	NC_022544	549726659	YP_008646849.1	UDP-N-acetylenolpyruvoylglucosamine reductase [Salmonella enterica subsp. enterica serovar Typhimurium str. DT2]
263	NC_022569	550903491	YP_008672583.1	UDP-N-acetylenolpyruvoylglucosamine reductase [Salmonella enterica subsp. enterica serovar Typhimurium str. DT104]
265	NC_003197	16763616	NP_459231.1	UDP-3-O-[3-hydroxymyristoyl] glucosamine N-acyltransferase [Salmonella enterica subsp. enterica serovar Typhimurium str. LT2]
265	NC_003198	16759216	NP_454833.1	UDP-3-O-[3-hydroxymyristoyl] glucosamine N-acyltransferase [Salmonella enterica subsp. enterica serovar Typhi str. CT18]
265	NC_004631	29140766	NP_804108.1	UDP-3-O-[3-hydroxymyristoyl] glucosamine N-acyltransferase [Salmonella enterica subsp. enterica serovar Typhi str. Ty2]
265	NC_006511	56412499	YP_149574.1	UDP-3-O-[3-hydroxymyristoyl] glucosamine N-acyltransferase [Salmonella enterica subsp. enterica serovar Paratyphi A str. ATCC 9150]
265	NC_006905	62178796	YP_215213.1	UDP-3-O-[3-hydroxymyristoyl] glucosamine N-acyltransferase [Salmonella enterica subsp. enterica serovar Choleraesuis str. SC-B67]
265	NC_010067	161504655	YP_001571767.1	UDP-3-O-[3-hydroxymyristoyl] glucosamine N-acyltransferase [Salmonella enterica subsp. arizonae serovar 62:z4,z23:- str. RSK2980]
265	NC_010102	161612598	YP_001586563.1	UDP-3-O-[3-hydroxymyristoyl] glucosamine N-acyltransferase [Salmonella enterica subsp. enterica serovar Paratyphi B str. SPB7]
265	NC_011080	194446270	YP_002039466.1	UDP-3-O-[3-hydroxymyristoyl] glucosamine N-acyltransferase [Salmonella enterica subsp. enterica serovar Newport str. SL254]
265	NC_011083	194449850	YP_002044216.1	UDP-3-O-[3-hydroxymyristoyl] glucosamine N-acyltransferase [Salmonella enterica subsp. enterica serovar Heidelberg str. SL476]
265	NC_011094	194737345	YP_002113249.1	UDP-3-O-[3-hydroxymyristoyl] glucosamine N-acyltransferase [Salmonella enterica subsp. enterica serovar Schwarzengrund str. CVM19633]
265	NC_011147	197361434	YP_002141070.1	UDP-3-O-[3-hydroxymyristoyl] glucosamine N-acyltransferase [Salmonella enterica subsp. enterica serovar Paratyphi A str. AKU_12601]
265	NC_011149	197251563	YP_002145231.1	UDP-3-O-[3-hydroxymyristoyl] glucosamine N-acyltransferase [Salmonella enterica subsp. enterica serovar Agona str. SL483]
265	NC_011205	198245250	YP_002214187.1	UDP-3-O-[3-hydroxymyristoyl] glucosamine N-acyltransferase [Salmonella enterica subsp. enterica serovar Dublin str. CT_02021853]
265	NC_011274	205351563	YP_002225364.1	UDP-3-O-[3-hydroxymyristoyl] glucosamine N-acyltransferase [Salmonella enterica subsp. enterica serovar Gallinarum str. 287/91]
265	NC_011294	207855744	YP_002242395.1	UDP-3-O-[3-hydroxymyristoyl] glucosamine N-acyltransferase [Salmonella enterica subsp. enterica serovar Enteritidis str. P125109]
265	NC_012125	224582074	YP_002635872.1	UDP-3-O-[3-hydroxymyristoyl] glucosamine N-acyltransferase [Salmonella enterica subsp. enterica serovar Paratyphi C strain RKS4594]
265	NC_016810	378698205	YP_005180162.1	UDP-3-O-[3-hydroxymyristoyl] glucosamine N-acyltransferase [Salmonella enterica subsp. enterica serovar Typhimurium str. SL1344]
265	NC_016831	378954035	YP_005211522.1	UDP-3-O-[3-hydroxymyristoyl] glucosamine N-acyltransferase [Salmonella enterica subsp. enterica serovar Gallinarum/pullorum str. RKS5078]
265	NC_016832	378958373	YP_005215859.1	UDP-3-O-[3-hydroxymyristoyl] glucosamine N-acyltransferase [Salmonella enterica subsp. enterica serovar Typhi str. P-stx-12]
265	NC_016854	378443679	YP_005231311.1	UDP-3-O-[3-hydroxymyristoyl] glucosamine N-acyltransferase [Salmonella enterica subsp. enterica serovar Typhimurium str. D23580]
265	NC_016856	378448539	YP_005235898.1	UDP-3-O-[3-hydroxymyristoyl] glucosamine N-acyltransferase [Salmonella enterica subsp. enterica serovar Typhimurium str. 14028S]
265	NC_016857	379699447	YP_005241175.1	UDP-3-O-[3-hydroxymyristoyl] glucosamine N-acyltransferase [Salmonella enterica subsp. enterica serovar Typhimurium str. ST4/74]
265	NC_016860	378982768	YP_005245923.1	UDP-3-O-[3-hydroxymyristoyl] glucosamine N-acyltransferase [Salmonella enterica subsp. enterica serovar Typhimurium str. T000240]
265	NC_016863	378987631	YP_005250795.1	UDP-3-O-[3-hydroxymyristoyl] glucosamine N-acyltransferase [Salmonella enterica subsp. enterica serovar Typhimurium str. UK-1]
265	NC_017046	383495049	YP_005395738.1	UDP-3-O-[3-hydroxymyristoyl] glucosamine N-acyltransferase [Salmonella enterica subsp. enterica serovar Typhimurium str. 798]
265	NC_017623	386590118	YP_006086518.1	UDP glucosamine N-acyltransferase [Salmonella enterica subsp. enterica serovar Heidelberg str. B182]
265	NC_020307	452121467	YP_007471715.1	UDP-3-O-[3-hydroxymyristoyl] glucosamine N-acyltransferase [Salmonella enterica subsp. enterica serovar Javiana str. CFSAN001992]
[truncated: 1,107 more rows]
